# Supplementary material for: Designing stable viologen anolytes for aqueous organic redox flow batteries by enhancing electron donor−acceptor interactions
Source: Research Square preprint supplement (doi:10.21203/rs.3.rs-7369273/v1), 2025-09-26
Supplement: Supplementary file 1 [file 548f18b4ea2c8f02a855b837.docx]

**[Supplementary Information](https://www.nature.com/nmat/submission-guidelines/aip-and-formatting" \l "supplementary-information)**

Designing stable viologen anolytes for aqueous organic redox flow battery by enhancing electron donor−acceptor interactions

*Manrong Song1,2, Honglin Chen1,2, Meiling Huang1,2, Youke Chen1,2, Xiaocong Zhou1,2, Jiaheng Hu1,2, Jing Sun3, Qinping Jian3, Jiayou Ren3, Yilin Wang1,2, Bin Liu3*, Tianshou Zhao1,2,3**

*1**Department of Mechanical and Energy Engineering, Southern University of Science and Technology, Shenzhen 518055, China*

*2Joint Research Center on Energy Storage Technology in Salt Caverns, Shenzhen 518055, China*

*3Department of Mechanical and Aerospace Engineering, The Hong Kong University of Science and Technology, Hong Kong SAR, China*

**Chemicals**

4,4'-bipyridine and 1-methylimidazole were purchased from TCI and Bide Pharmatech, respectively. 1,2-dichloroethane,1,3-dibromopropane, 1,4-dibromobutane and Amberlite® IRA-900 chloride were purchased from Macklin. Ferrocene, AlCl3, NaBH4, trimethylamine and 3-chloropropanyl chloride were purchased from Sigma-Aldrich. D2O and DMSO-d6 were purchased from Adamas and Macklin, respectively. All reagents were used without further purification. Solvents for chromatography and reaction were obtained by passing commercially available.

**Instrumentation**

NMR spectra were collected on Bruker AVANCE Ⅲ 400 or AVANCE Ⅲ 500 instrument and calibrated by using residual deuterium Oxide (δH = 4.79 ppm), or dimethyl-d6 sulfoxide (δH = 4.79 ppm) or DMSO-d6 (δC = 39.60 ppm) as internal references. The following abbreviations are used to designate multiplicities: s = singlet, d = doublet, t = triplet, q = quartet, m = multiplet, quint = quintet, br = broad. UV−vis spectra were recorded on a PerkinElmer Lambda 365 spectrometer. High−resolution mass spectra (HRMS) were recorded on a Thermo Scientific Q Exactive Hybrid QuadrupoleOrbitrap mass spectrometer. X-Ray crystallographic analysis was performed on a Bruker D8 Venture diffractometer with PHOTON II detector in shutterless mode with an incoat microfocus source equipped with an Oxford 800 Plus liquid nitrogen vapor cooling device. The flow cell was galvanostatically charged/discharged at room temperature on an Arbin LBT battery tester (Arbin Instruments) at current densities ranging from 20 to 80 mA cm−2. Electrochemical measurements including cyclic voltammetry (CV) and linear sweep voltammetry were recorded by an electrochemical analyzer from CH instruments CHI 706E with a three−electrode system (one glassy carbon working electrode, one platinum counter electrode and one Ag/AgCl reference electrode). RDE setup was purchased from PINE Instrument Company.

**Synthetic procedures**

**Scheme 1. Synthesis of CnViIm (x=2,3,4) electrolyte.**

**Synthesis of 1-(2-Chloroethyl)-3-methylimidazolium chloride.**

1-(2-Chloroethyl)-3-methylimidazolium chloride was synthesized using procedures previously reported by Li et al1.

**1H NMR** (400 MHz, Deuterium Oxide, 298 K**)** δ 8.86 (s, 1H), 7.57 (d, J = 1.9 Hz, 1H), 7.49 (d, J = 1.9 Hz, 1H), 4.61 – 4.58 (m, 2H), 4.01 – 3.98 (m, 2H), 3.93 (s, 3H).

**13C NMR** (400 MHz, Deuterium Oxide, 298 K) δ 136.65, 123.71, 122.37, 50.80, 42.68, 35.80.

**Synthesis of 1,1'-bis(2-(1-methyl-imidazolium)ethyl)-4,4'-bipyridinium** **chloride (C2ViIm)**

To a solution of compound 4,4'-Bipyridine (4.80 g, 20.0 mmol, 1.0 equiv) and 1-(2-Chloroethyl)-3-methylimidazolium chloride (11.0 g, 60.0 mmol, 3.0 equiv) in H2O (5 mL), the mixed solution was reacted in a hydrothermal autoclave at 120°C for 48 hours. After the reaction, ethanol and then acetone were added to the resultant aqueous solution in sequential order in a 1:5:10 (product:ethanol:acetone) volume ratio to precipitate out the pure product. The product was filtered, washed with DMF, MeCN, and acetone in sequence. At last, the residue was concentrated in vacuo to give compound C2ViIm.

**1H NMR** (400 MHz, Deuterium Oxide, 298 K) δ 9.03 (d, J = 6.6 Hz, 4H), 8.53 (d, J = 6.5 Hz, 4H), 7.44 (d, J = 2.0 Hz, 2H), 7.39 (d, J = 2.0 Hz, 2H), 5.19 (t, J = 6.2 Hz, 4H), 4.90 (t, J = 6.2 Hz, 4H), 3.81 (s, 6H).

**13C NMR** (400 MHz, Deuterium Oxide, 298 K) δ 150.95 , 145.98 , 136.85 , 127.75 , 124.75 , 122.18 , 60.38 , 48.58 , 36.03 .

**HRMS** (ESI, Pos) m/z: [M]4+ Calcd for C22H28N6 94.0588, Found 94.0590.

**Synthesis of** **1-(2-Bromopropyl)-3-methylimidazolium chloride.**

The preparation of 1-(2-Bromopropyl)-3-methylimidazolium bromide complexe followed the similar procedures as described for 1-(2-Chloroethyl)-3-methylimidazolium chloride.

**1H NMR** (400 MHz, Deuterium Oxide, 298 K) δ 8.78 (s, 1H), 7.51 (d, J = 2.0 Hz, 1H), 7.44 (d, J = 2.0 Hz, 1H), 4.39 (t, J = 6.7 Hz, 2H), 3.89 (s, 3H), 3.44 (t, J = 6.2 Hz, 2H), 2.41 (p, J = 6.5 Hz, 2H).

**Synthesis of 1,1'-bis(3-(1-methyl-imidazolium)propyl)-4,4'-bipyridinium chloride (C3ViIm)**

The preparation of C3ViIm electrolyte followed the similar procedures as described for C2ViIm. Ion exchange of C3ViIm to its chloride salt was performed by flushing an aqueous solution of C3ViIm over an ion-exchange column filled with Amberlite IRA-900 ion exchange resin. The absence of bromide was verified by CV.

**1H NMR** (500 MHz, Deuterium Oxide, 298 K) δ 9.16 (d, J = 6.4 Hz, 4H), 8.85 (s, 1H), 8.68 – 8.56 (m, 4H), 7.57 (t, J = 2.0 Hz, 2H), 7.49 (d, J = 1.9 Hz, 2H), 4.91 – 4.81 (m, 4H), 4.44 (t, J = 7.4 Hz, 4H), 3.91 (s, 6H), 2.72 (p, J = 7.6 Hz, 4H).

**13C NMR** (500 MHz, Deuterium Oxide, 298 K) δ 150.35 , 145.64 , 136.26 , 127.30 , 124.02 , 122.07 , 58.53 , 45.97 , 35.78 , 30.86 .

**HRMS** (ESI, Pos) m/z: [M]4+ Calcd for C24H32N6 101.0667, Found 101.0665.

**Synthesis of 1-(2-Bromobutyl)-3-methylimidazolium** **bromide.**

The preparation of 1-(2-Bromobutyl)-3-methylimidazolium bromide complexe followed the similar procedures as described for 1-(2-Chloroethyl)-3-methylimidazolium chloride. The same procedure was used until the colloidal form 1-(2-Bromobutyl)-3-methylimidazolium bromide was obtained. The obtained product has no dicationic byproduct.

**1H NMR** (400 MHz, Deuterium Oxide, 298 K) δ 8.80 (s, 1H), 7.60 – 7.45 (m, 2H), 4.30 (dd, J = 8.2, 5.9 Hz, 2H), 3.94 (s, 3H), 3.56 (t, J = 6.4 Hz, 2H), 2.18 – 2.01 (m, 2H), 2.01 – 1.87 (m, 2H).

**13C NMR** (400 MHz, Deuterium Oxide, 298 K) δ 135.91 , 123.62 , 122.18 , 48.74 (d, J = 4.3 Hz), 35.79 , 33.49 , 28.64 , 28.08 , 26.25 .

**Synthesis of 1,1'-bis(4-(1-methyl-imidazolium)butyl)-4,4'-bipyridinium chloride (C4ViIm).**

The preparation of C4ViIm compound followed the similar procedures as described for C2ViIm. Ion exchange of C4ViIm to its chloride salt was performed by flushing an aqueous solution of C4ViIm over an ion-exchange column filled with Amberlite IRA-900 ion exchange resin. The absence of bromide was verified by CV.

**1H NMR** (400 MHz, Deuterium Oxide, 298 K) δ 9.16 – 9.09 (m, 4H), 8.75 (s, 2H), 8.56 (d, J = 6.5 Hz, 4H), 7.49 (d, J = 1.9 Hz, 2H), 7.45 (d, J = 2.0 Hz, 2H), 4.77 (d, J = 8.0 Hz, 4H), 4.29 (t, J = 7.0 Hz, 4H), 3.89 (s, 6H), 2.13 (t, J = 8.2 Hz, 4H), 2.03 (dt, J = 8.8, 6.4 Hz, 4H).

**13C NMR** (400 MHz, Deuterium Oxide, 298 K) δ 150.17 , 145.46 , 127.07 , 123.68 , 121.97 , 61.13 , 48.49 , 35.60 , 27.40 , 26.12 .

**HRMS** (ESI, Pos) m/z: [M]4+ Calcd for C26H38N6 108.5784, Found 108.5786.

**Synthesis of bis((3-trimethylammonio)propyl)ferrocene (BTMAP-Fc).**

1,1-bis(3-chloropropyl)ferrocene was synthesized using procedures previously reported by Xu et al2 and Aziz et al3.

10.9 g (24.0 mmol) of pure 1,1-bis(3-chloropropyl)ferrocene was dissolved in about 100 mL of 4.2 M trimethylamine in ethanol. The solution was sealed in a thick-walled glass tube and heated to 60 °C for more than 5 days. Then, all volatile materials were removed in vacuo to obtain a yellow oil. The oil was stirred in H2O (~150 mL) and filtered to remove unreacted ferrocene and other water-insoluble impurities. The filtrate was evaporated in vacuo to obtain pure BTMAP-Fc.

**1H NMR** (400 MHz, Deuterium Oxide, 298 K) δ 4.22 – 4.14 (m, 8H), 3.35 – 3.27 (m, 4H), 3.09 (s, 18H), 2.50 (t, J = 7.3 Hz, 4H), 1.98 (p, J = 7.5 Hz, 4H).

The single crystals of the C2ViIm, C3ViIm and C4ViIm were prepared by slow diffusion of hexane solvent into an ethanol solution of the C2ViIm, C3ViIm and C4ViIm, respectively.


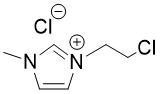

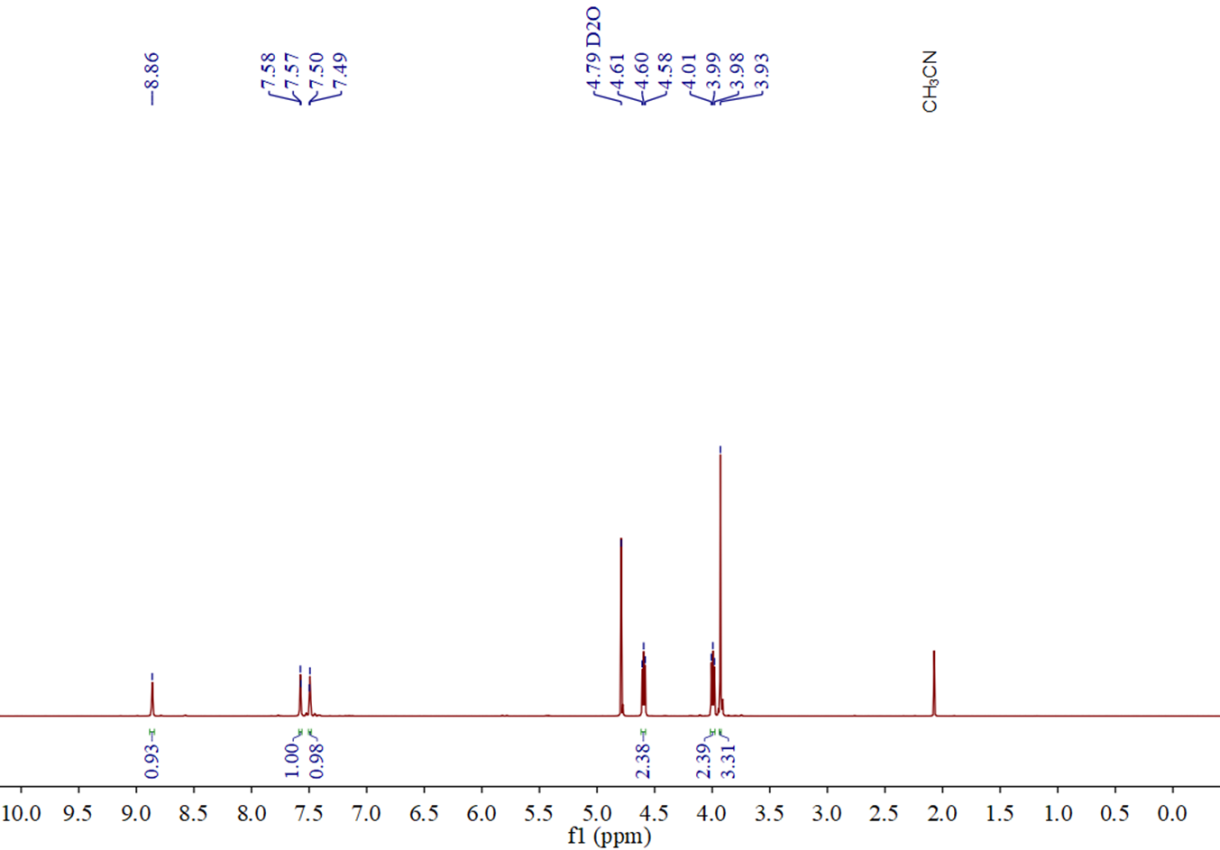


**Supplementary Figure 1**. The 1H NMR spectrum of 1-(2-chloroethyl)-3-methylimidazolium chloride. 1H NMR (400 MHz, Deuterium Oxide) δ 8.86 (s, 1H), 7.57 (d, J = 1.9 Hz, 1H), 7.49 (d, J = 1.9 Hz, 1H), 4.61 – 4.58 (m, 2H), 4.01 – 3.98 (m, 2H), 3.93 (s, 3H).


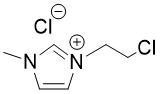

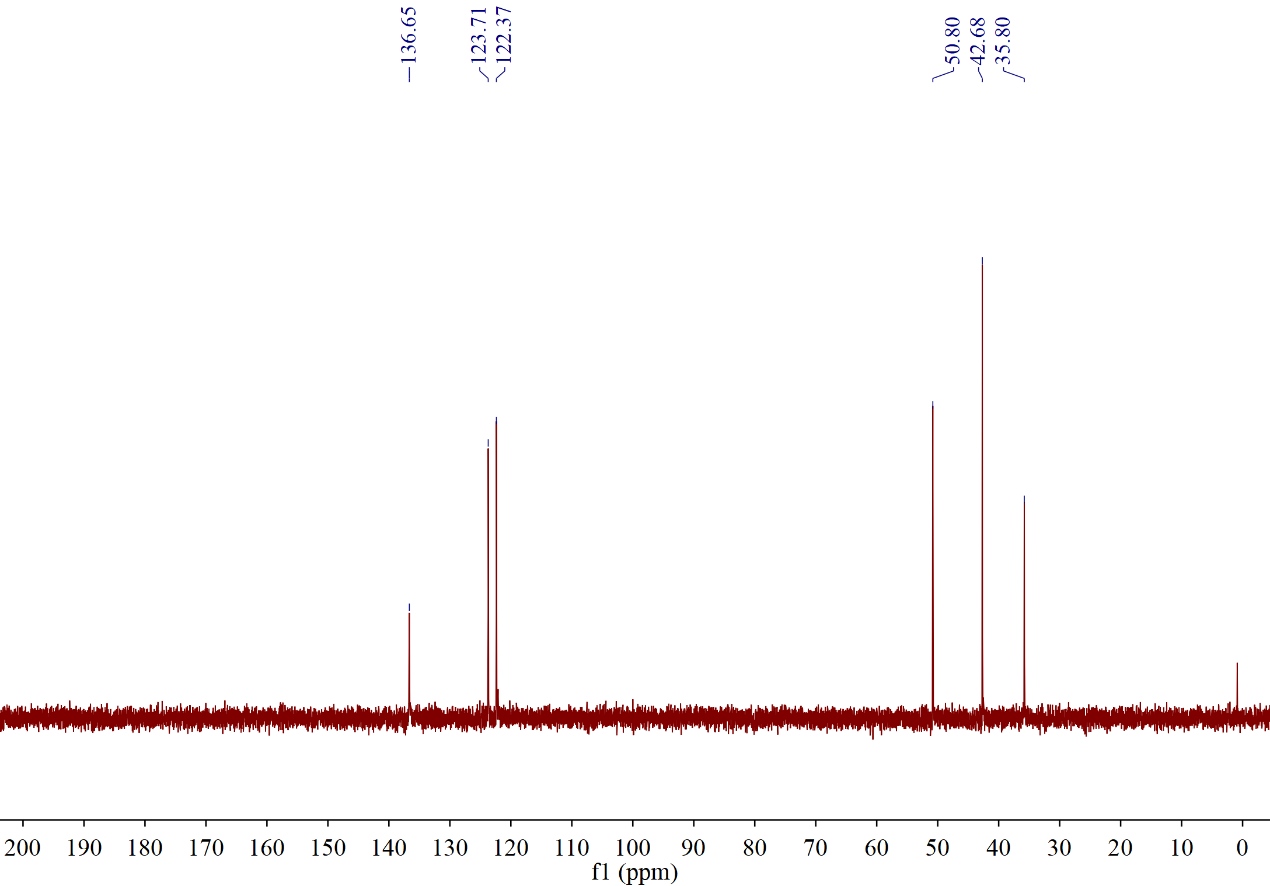


**Supplementary Figure 2**. 13C NMR spectrum of 1-(2-chloroethyl)-3-methylimidazolium chloride. 13C NMR (101 MHz, Deuterium Oxide) δ 136.65 , 123.71 , 122.37 , 50.80 , 42.68 , 35.80 .


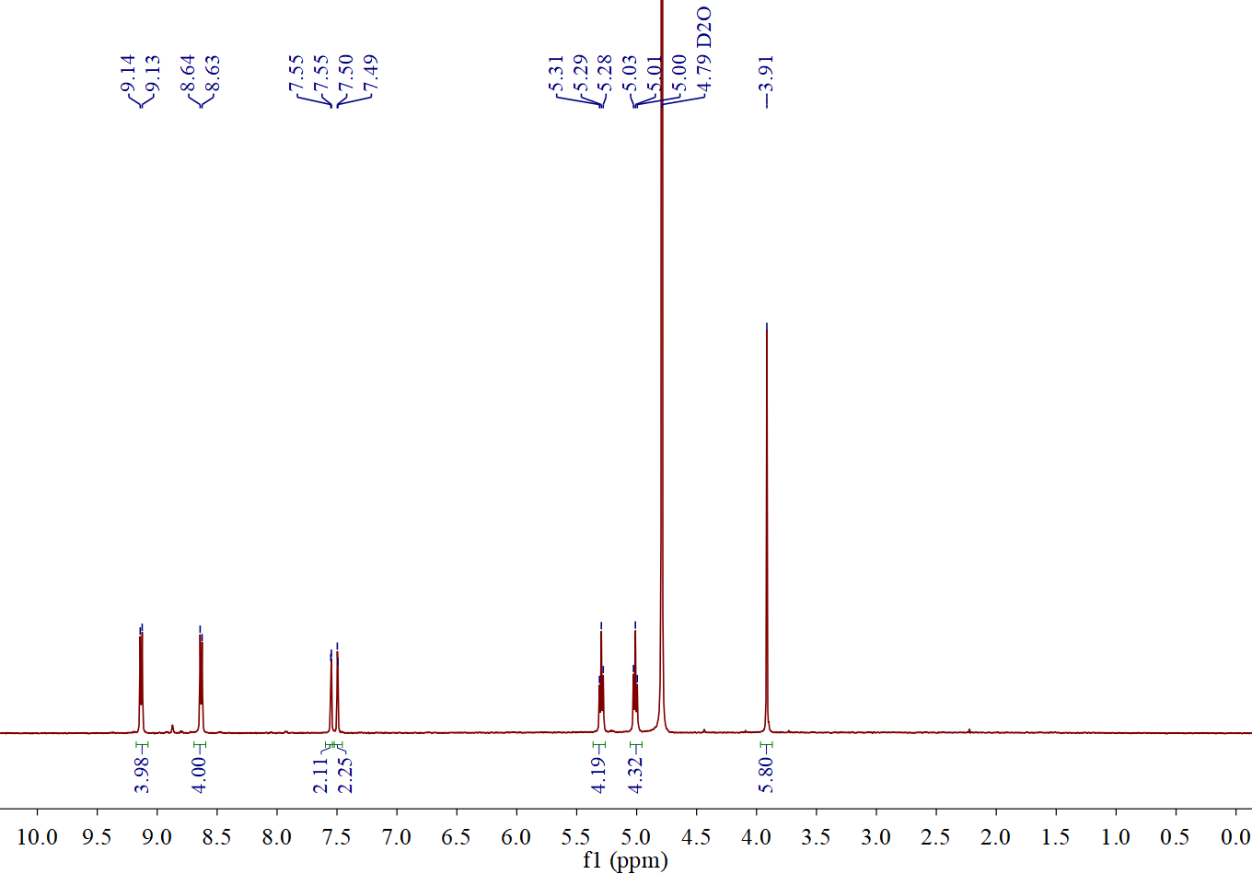


**Supplementary Figure 3**. The 1H NMR spectrum of C2ViIm. 1H NMR (400 MHz, Deuterium Oxide) δ 9.03 (d, J = 6.6 Hz, 4H), 8.53 (d, J = 6.5 Hz, 4H), 7.44 (d, J = 2.0 Hz, 2H), 7.39 (d, J = 2.0 Hz, 2H), 5.19 (t, J = 6.2 Hz, 4H), 4.90 (t, J = 6.2 Hz, 4H), 3.81 (s, 6H).


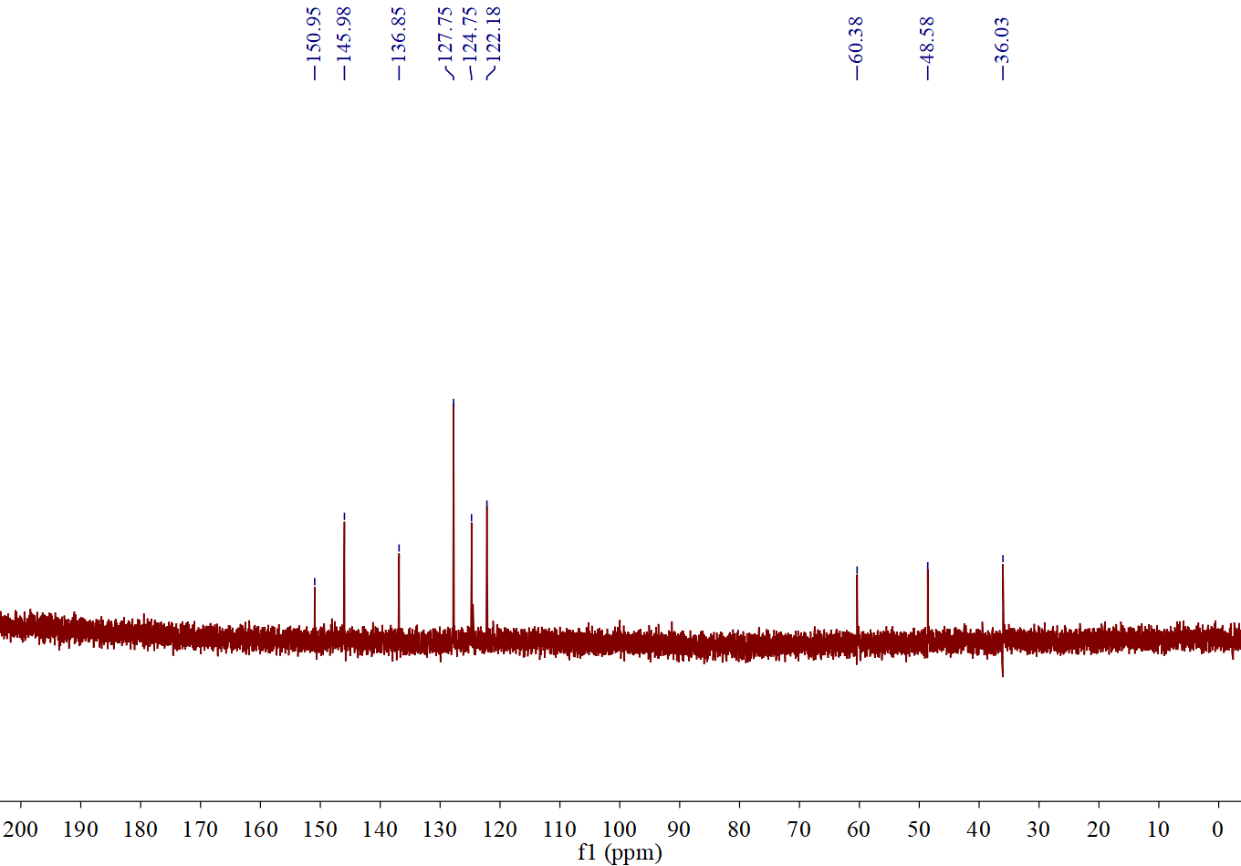


**Supplementary Figure 4**. 13C NMR spectrum of C2ViIm. 13C NMR (101 MHz, Deuterium Oxide) δ 150.95 , 145.98 , 136.85 , 127.75 , 124.75 , 122.18 , 60.38 , 48.58 , 36.03 .


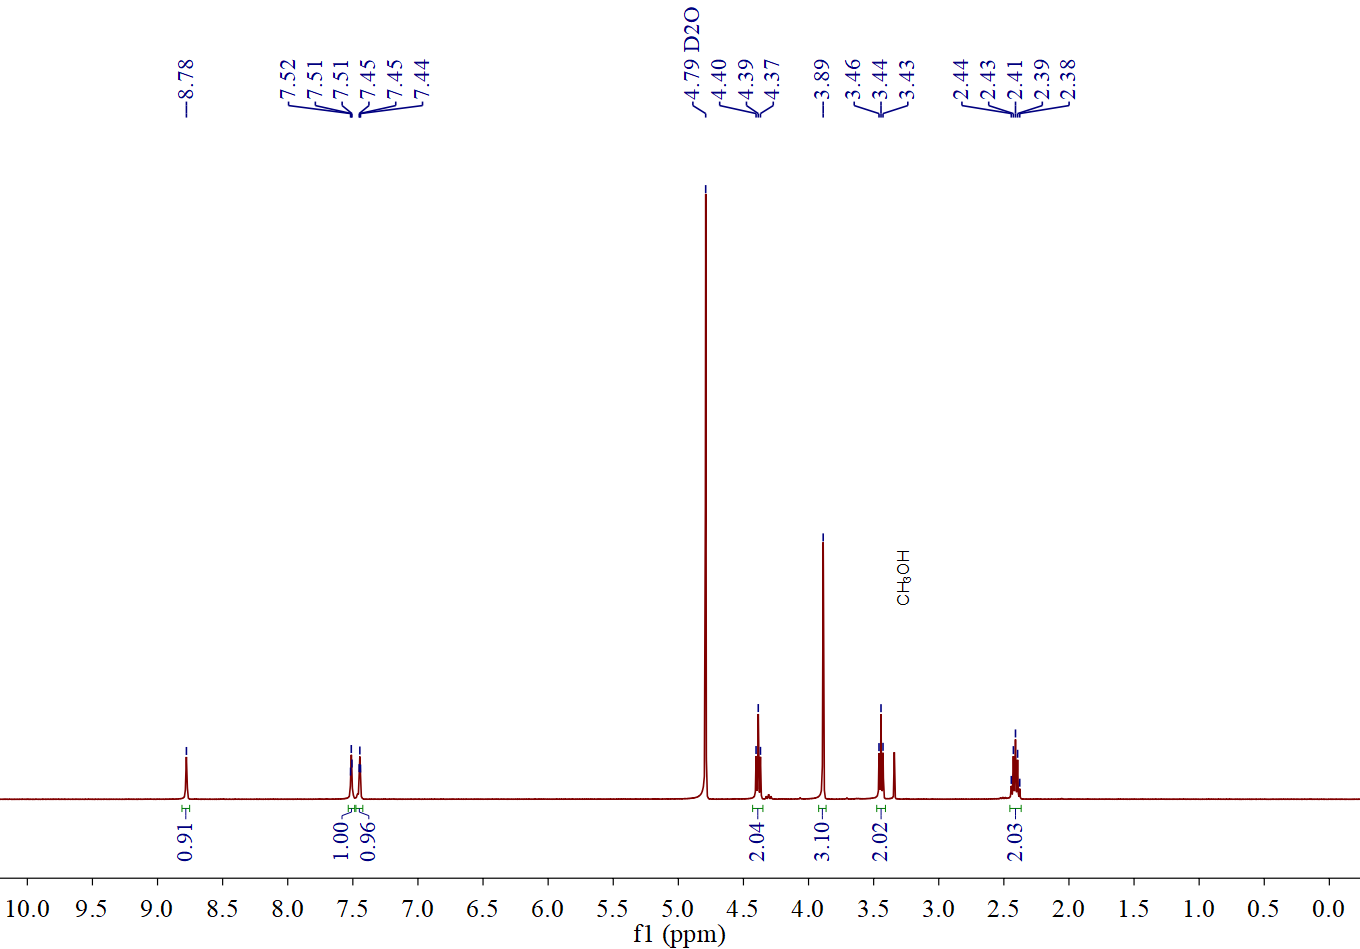


**Supplementary Figure 5**. 1H NMR spectrum of 1-(2-Bromopropyl)-3-methylimidazolium chloride. 1H NMR (400 MHz, Deuterium Oxide) δ 8.78 (s, 1H), 7.51 (d, J = 2.0 Hz, 1H), 7.44 (d, J = 2.0 Hz, 1H), 4.39 (t, J = 6.7 Hz, 2H), 3.89 (s, 3H), 3.44 (t, J = 6.2 Hz, 2H), 2.41 (p, J = 6.5 Hz, 2H).


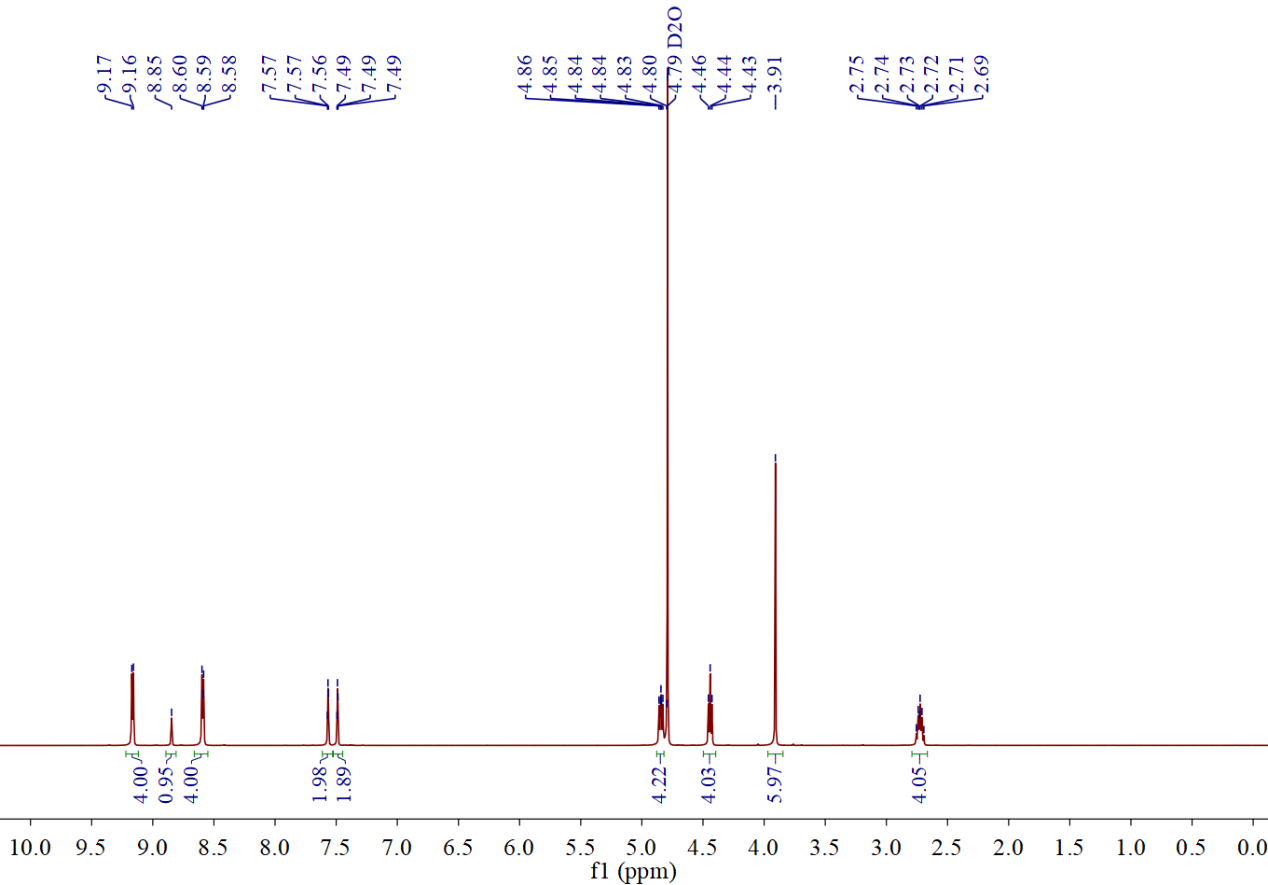


**Supplementary Figure 6**. The 1H NMR spectrum of C3ViIm. 1H NMR (500 MHz, Deuterium Oxide) δ 9.16 (d, *J* = 6.4 Hz, 4H), 8.85 (s, 1H), 8.68 – 8.56 (m, 4H), 7.57 (t, *J* = 2.0 Hz, 2H), 7.49 (d, *J* = 1.9 Hz, 2H), 4.91 – 4.81 (m, 4H), 4.44 (t, *J* = 7.4 Hz, 4H), 3.91 (s, 6H), 2.72 (p, *J* = 7.6 Hz, 4H).


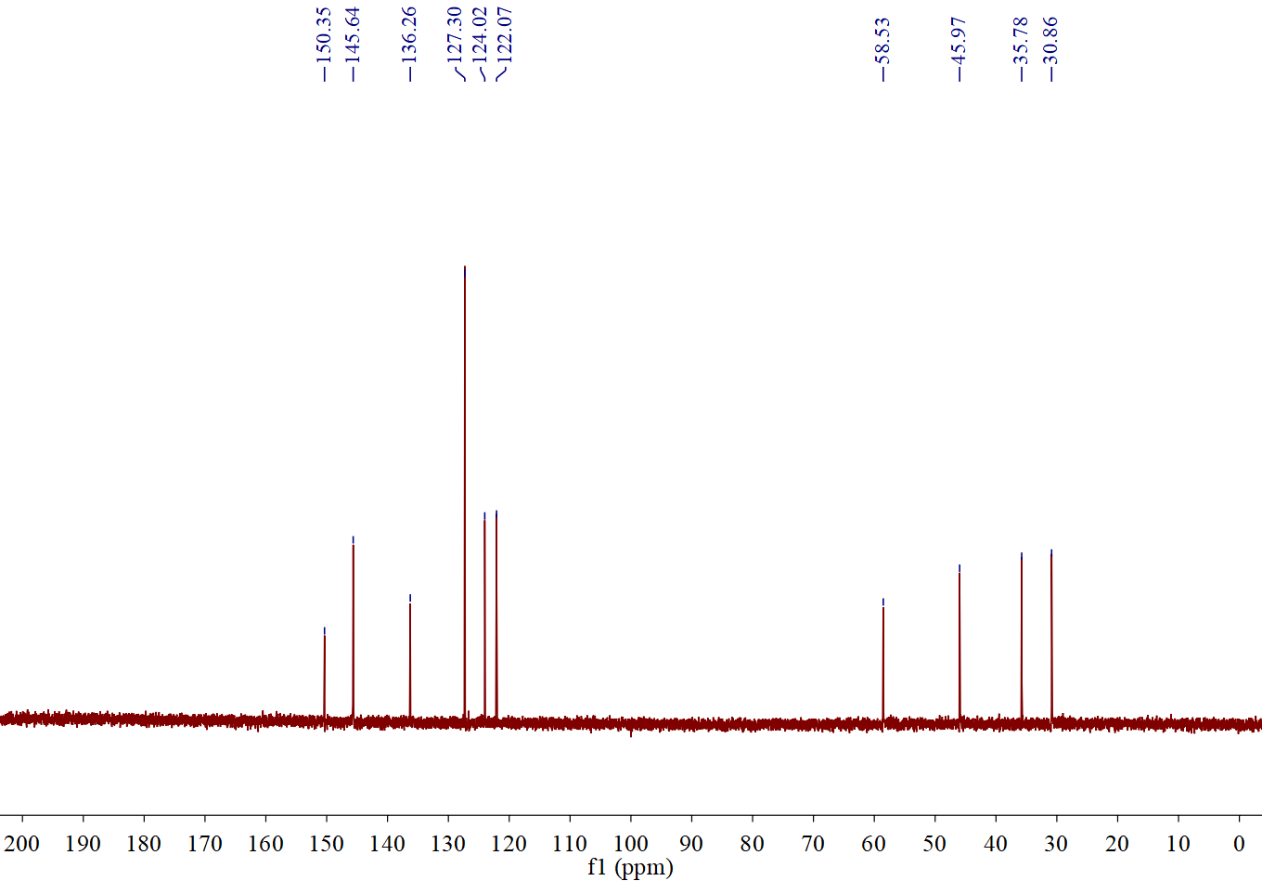


**Supplementary Figure 7**. 13C NMR spectrum of C3ViIm. 13C NMR (126 MHz, Deuterium Oxide) δ 150.35 , 145.64 , 136.26 , 127.30 , 124.02 , 122.07 , 58.53 , 45.97 , 35.78 , 30.86 .

**Supplementary Figure 8**. 1H NMR spectrum of 1-(2-Bromobutyl)-3-methylimidazolium bromide. 1H NMR (400 MHz, Deuterium Oxide) δ 8.80 (s, 1H), 7.60 – 7.45 (m, 2H), 4.30 (dd, J = 8.2, 5.9 Hz, 2H), 3.94 (s, 3H), 3.56 (t, J = 6.4 Hz, 2H), 2.18 – 2.01 (m, 2H), 2.01 – 1.87 (m, 2H).


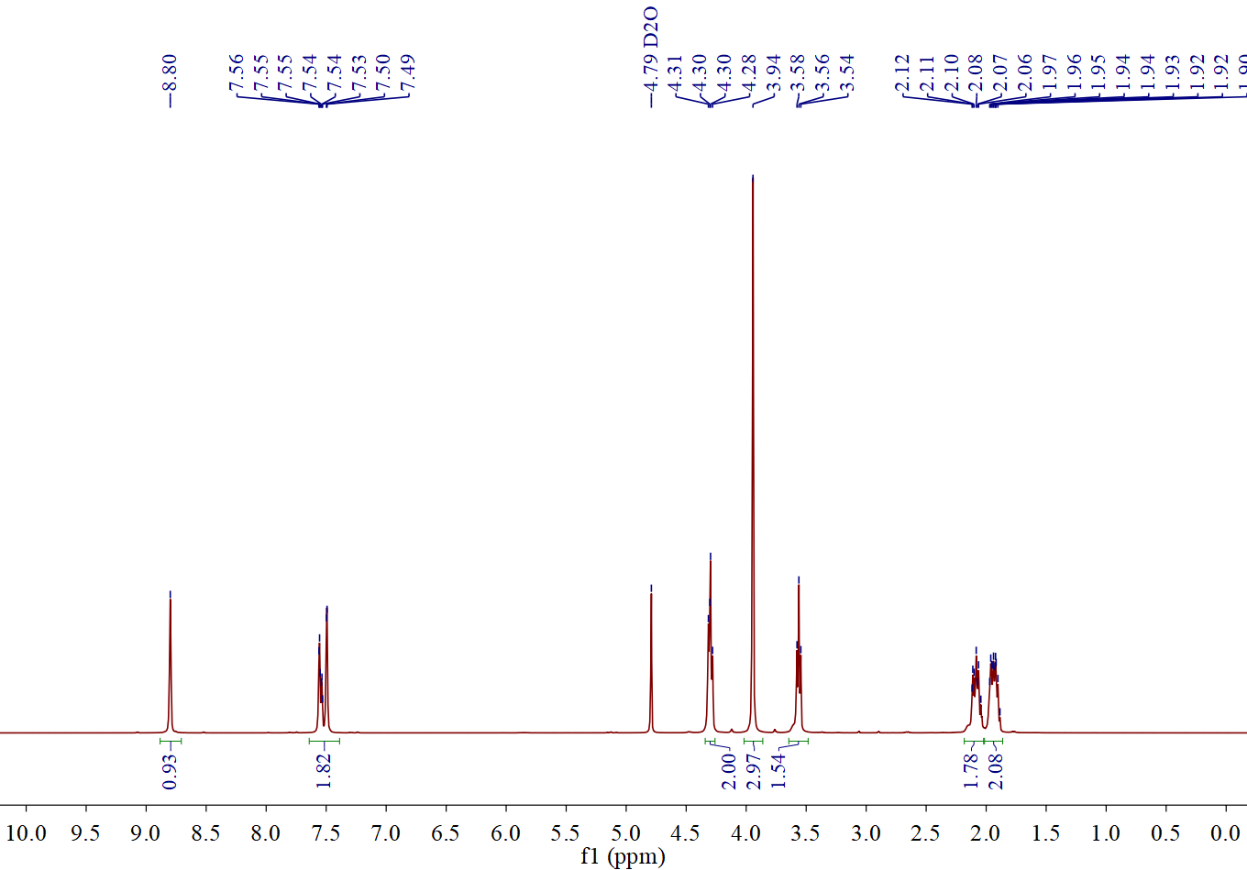

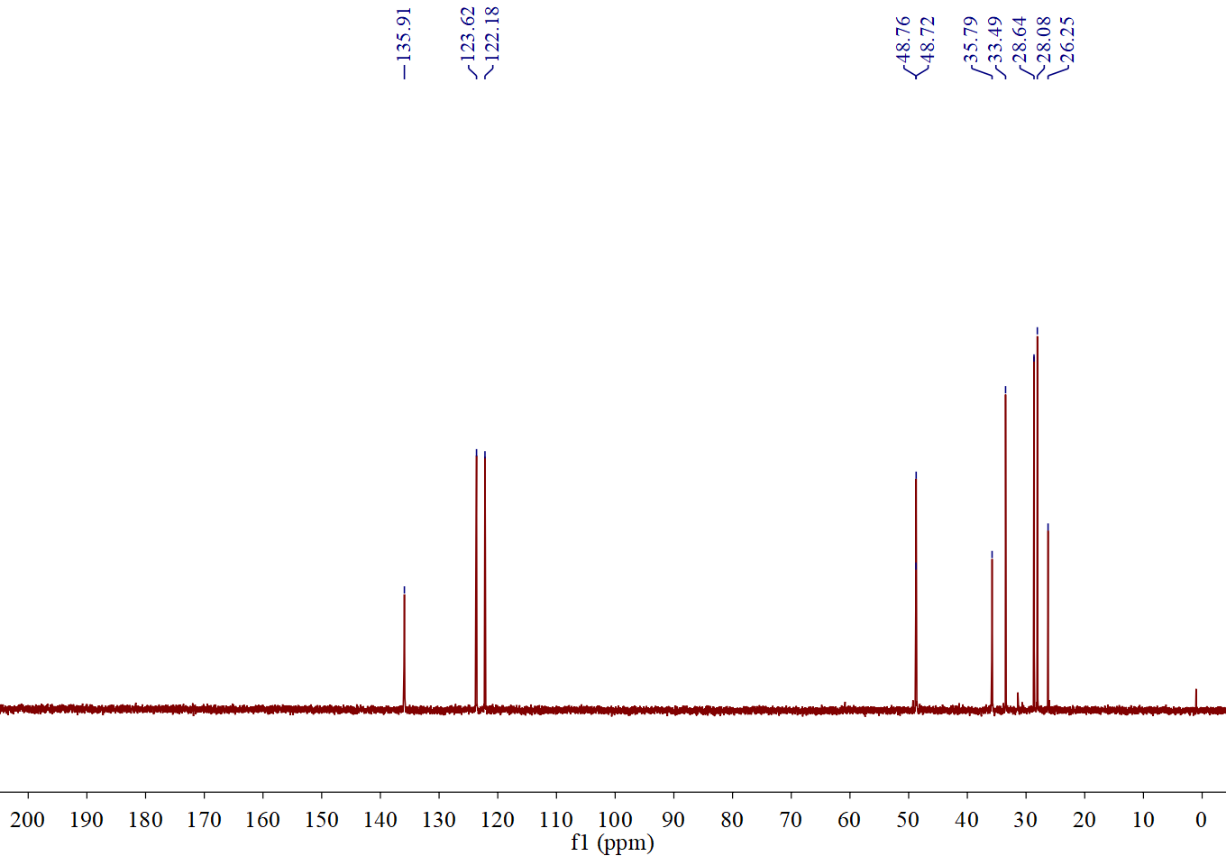


**Supplementary Figure 9**. 1H NMR spectrum of 1-(2-Bromobutyl)-3-methylimidazolium bromide. 13C NMR (400 MHz, Deuterium Oxide) δ 135.91 , 123.62 , 122.18 , 48.74 (d, J = 4.3 Hz), 35.79 , 33.49 , 28.64 , 28.08 , 26.25 .


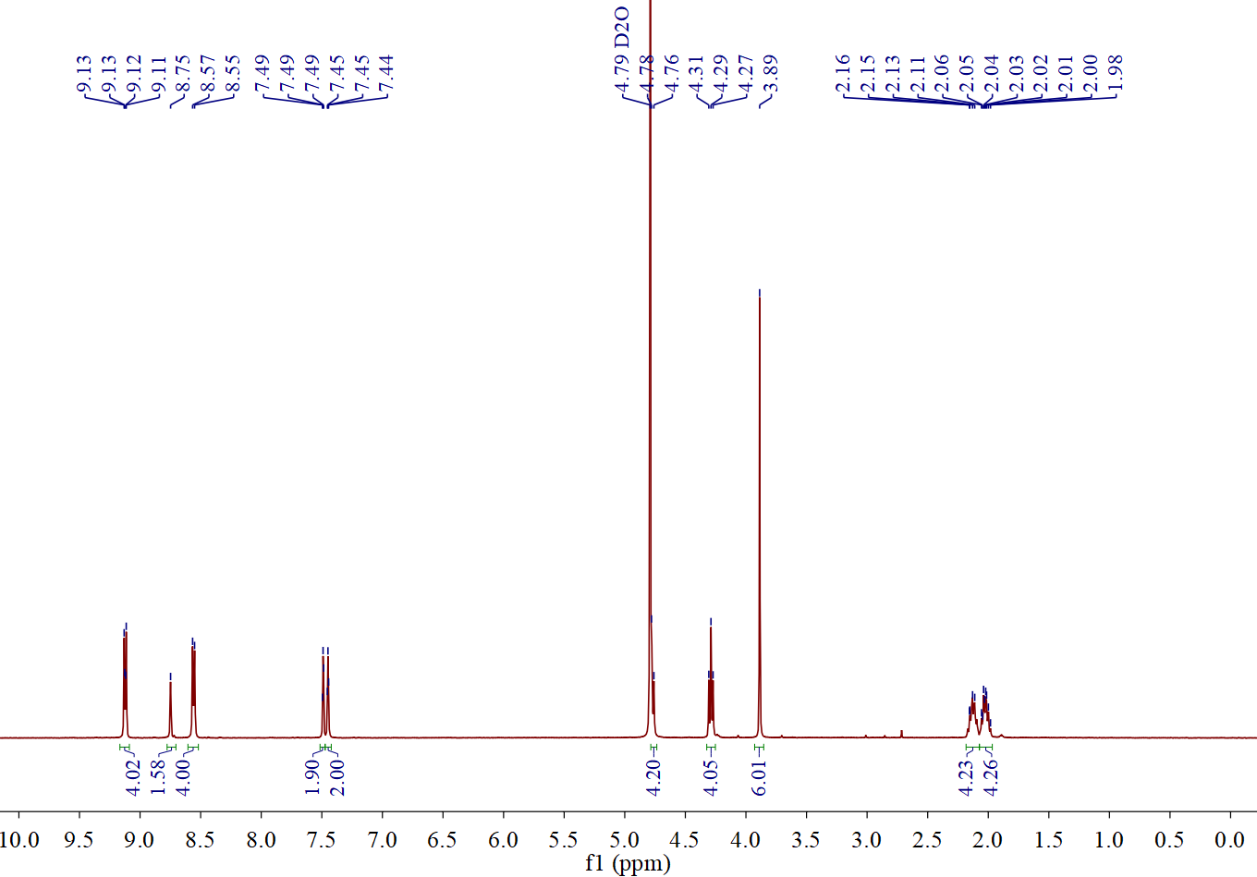


**Supplementary Figure 10**. 1H NMR spectrum of C4ViIm. 1H NMR (400 MHz, Deuterium Oxide) δ 9.16 – 9.09 (m, 4H), 8.75 (s, 2H), 8.56 (d, J = 6.5 Hz, 4H), 7.49 (d, J = 1.9 Hz, 2H), 7.45 (d, J = 2.0 Hz, 2H), 4.77 (d, J = 8.0 Hz, 4H), 4.29 (t, J = 7.0 Hz, 4H), 3.89 (s, 6H), 2.13 (t, J = 8.2 Hz, 4H), 2.03 (dt, J = 8.8, 6.4 Hz, 4H).


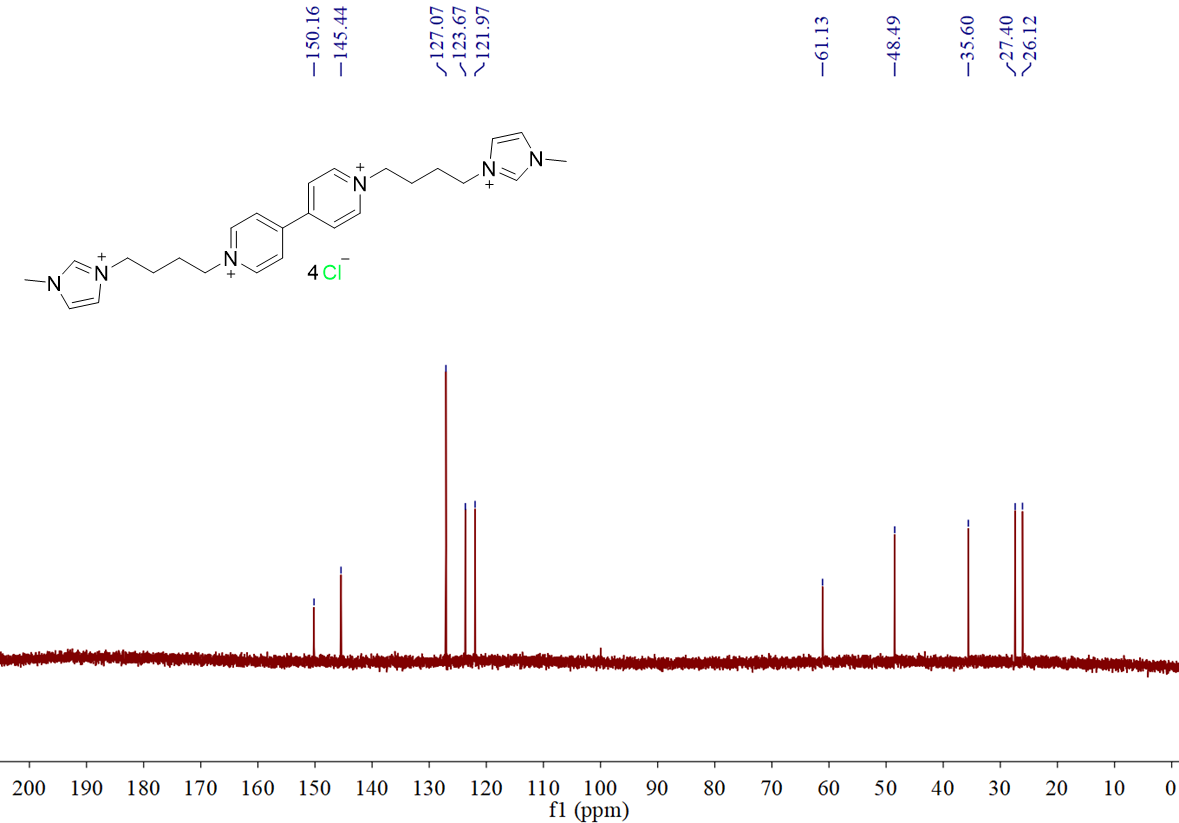


**Supplementary Figure 11**. 13C NMR spectrum of C4ViIm. 13C NMR (101 MHz, Deuterium Oxide) δ 150.17 , 145.46 , 127.07 , 123.68 , 121.97 , 61.13 , 48.49 , 35.60 , 27.40 , 26.12 .


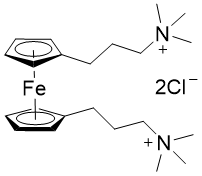


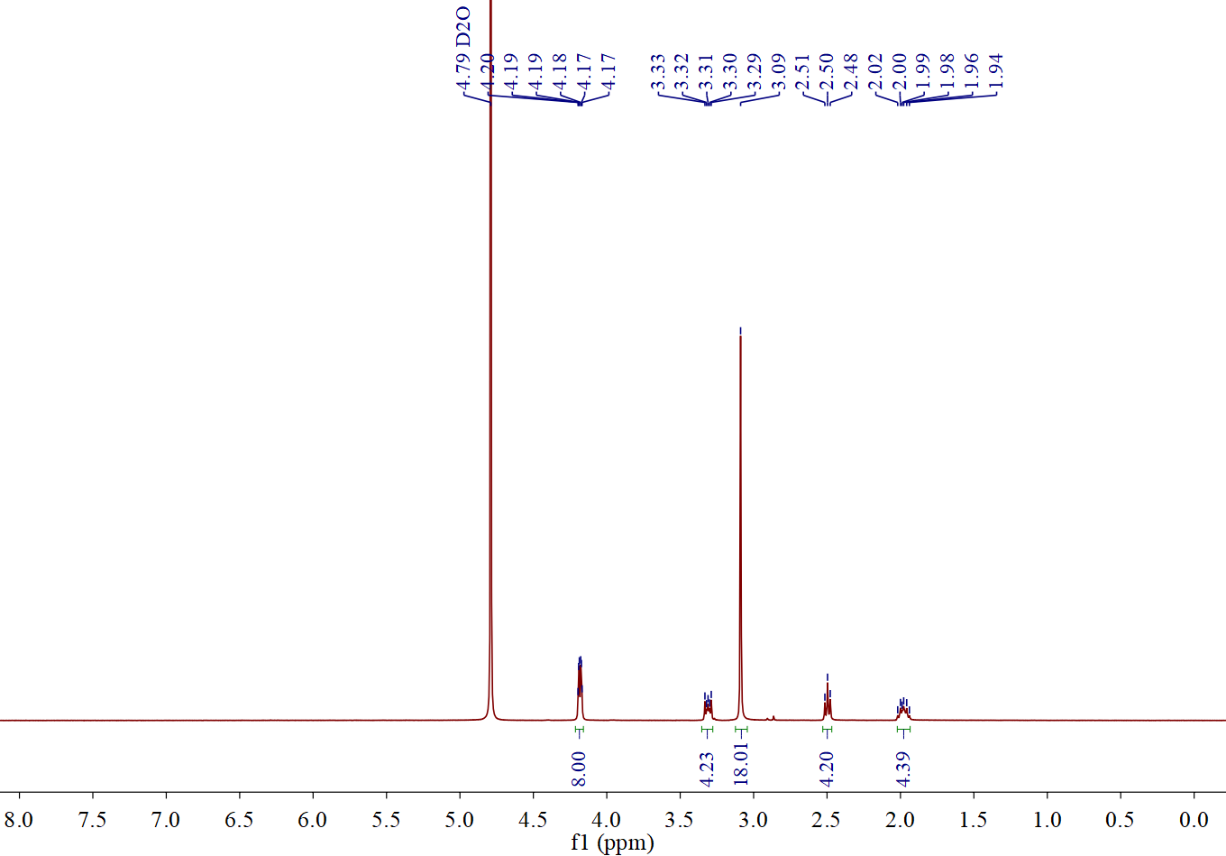


**Supplementary Figure 12**. 1H NMR spectrum of BTMAP-Fc. 1H NMR (400 MHz, Deuterium Oxide) δ 4.22 – 4.14 (m, 8H), 3.35 – 3.27 (m, 4H), 3.09 (s, 18H), 2.50 (t, J = 7.3 Hz, 4H), 1.98 (p, J = 7.5 Hz, 4H).

**Computational methods:**

All the quantum calculations were performed using the density functional theory (DFT), implemented in the Gaussian 09 software package4, with the default convergence criteria. All transition state searches, geometry optimization and frequency calculations were performed at the medium computational level based on Solvation Model Density (SMD)5. The use of the hybrid density functional B3LYP with the 6-31G(d) basis sets reduced computational costs and the difficulty of geometric optimization convergence6. Minimum energy points were identified as those with only positive eigenvalues, while first-order saddle points (TS) were identified as those with only one negative eigenvalue. In addition, intrinsic reaction coordinate (IRC)7 calculations were performed to confirm that each transition structure connects the precedent reactants to their respective products. Thermodynamic parameters were computed at 298 K and 1 atm, after frequency calculation in the default configuration using the standard statistical thermodynamic equations8. To accurately describe energy changes9,10, the hybrid exchange-correlation functional M06-2X11 was combined with the Ahlrichs 4-zeta def2-TZVPP basis set12 for single-point energy calculations of reactants, transition states, and products. The M06-2X, a highly-nonlocal functional that incorporates the double amount of nonlocal exchange (2X), was selected as the density functional due to its widespread applications in exploring reaction mechanism, especially when accounting for the solvent effects13. In addition, the introduction of Grimme's zero damping DFT-D3 method further compensates for the lack of long-range dispersion effects in M06-2X itself14. The Gibbs free energy (ΔG) is obtained through thermal correction of the electronic energy, further reflecting the differences in reaction energy barriers.


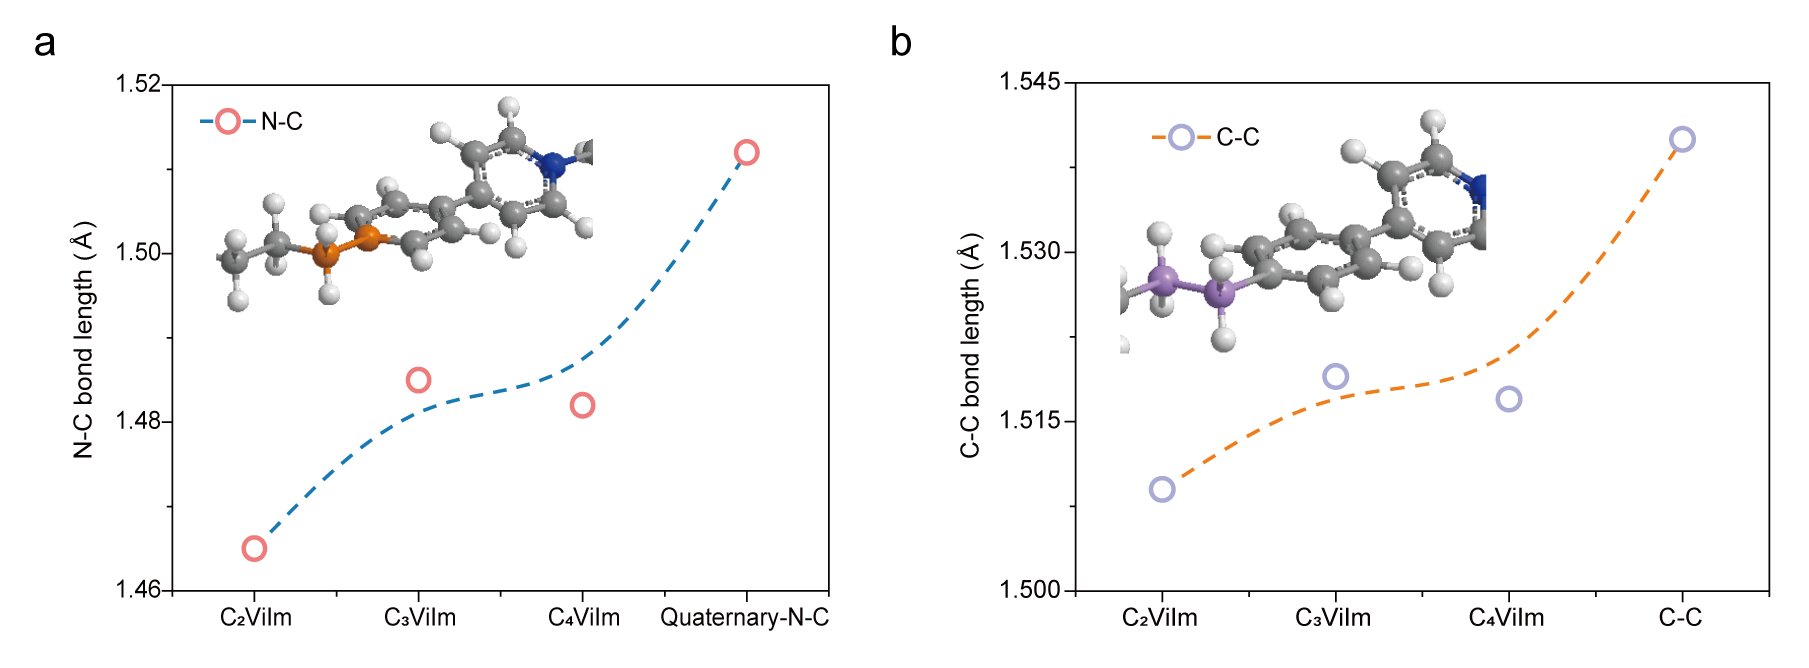


**Supplementary Figure 13**. Chemical/electrochemical properties of CnViIm (n=2,3,4) and resulting chemical bond length of synthesized viologen derivatives. **a**, Comparison of the bond lengths of N−C bonds in synthetic viologens and quaternary ammonium, quaternary-N−C bond length is generally 1.512 Å15. **b,** Comparison of the bond lengths of C−C bonds in synthetic viologens and Csp3−Csp3, the Csp3−Csp3 bond length is generally 1.54 Å16.

**Supplementary Table 1**. Crystal data and structure refinement for C2ViIm. **CCDC#2455722**

| Empirical formula | C22H28N6Cl4 |
| --- | --- |
| Formula weight | 571.34 |
| Temperature/K | 200.0(2) |
| Crystal system | monoclinic |
| Space group | C2/c |
| a/Å | 17.9612(6) |
| b/Å | 6.2392(2) |
| c/Å | 25.2772(9) |
| α/° | 90 |
| | β/° | | --- | | | 102.543(1) | | --- | |
| γ/° | 90 |
| Volume/Å3 | 2765.05(16) |
| Z | 4 |
| ρcalc g/cm3 | 1.372 |
| μ/mm‑1 | 0.463 |
| F(000) | 1196.0 |
| Crystal size/mm3 | 0.42 × 0.38 × 0.06 |
| Radiation | MoKα (λ = 0.71073) |
| 2θ range for data collection/° | 4.646 to 61.804 |
| Index ranges | -25 ≤ h ≤ 23, -9 ≤ k ≤ 9, -36 ≤ l ≤ 36 |
| Reflections collected | 48489 |
| Independent reflections | 4355 [Rint = 0.0870, Rsigma = 0.0418] |
| Data/restraints/parameters | 4355/0/163 |
| Goodness-of-fit on F2 | 1.025 |
| Final R indexes [I>=2σ (I)] | R1 = 0.0462 wR2 = 0.1110 |
| Final R indexes [all data] | R1 = 0.0667, wR2 = 0.1238 |
| Largest diff. peak/hole / e Å-3 | 0.51/-0.45 |

**Supplementary Table 2**. Crystal data and structure refinement for C3ViIm. **CCDC #2464546**

| Empirical formula | C28H42N6Cl4 |
| --- | --- |
| Formula weight | 309.21 |
| Temperature/K | 200.0(2) |
| Crystal system | monoclinic |
| Space group | P21/n |
| a/Å | 12.0206(5) |
| b/Å | 7.2406(3) |
| c/Å | 17.8219(6) |
| α/° | 90 |
| | β/° | | --- | | | 103.6110(10) | | --- | |
| γ/° | 90 |
| Volume/Å3 | 1507.59(10) |
| Z | 4 |
| ρcalc g/cm3 | 1.362 |
| μ/mm‑1 | 0.433 |
| F(000) | 652.0 |
| Crystal size/mm3 | 0.36 × 0.28 × 0.06 |
| Radiation | MoKα (λ = 0.71073) |
| 2θ range for data collection/° | 4.642 to 60.99 |
| Index ranges | -16 ≤ h ≤ 17, -10 ≤ k ≤ 10, -25 ≤ l ≤ 25 |
| Reflections collected | 34460 |
| Independent reflections | 4579 [Rint = 0.0790, Rsigma = 0.0480] |
| Data/restraints/parameters | 4579/0/180 |
| Goodness-of-fit on F2 | 1.030 |
| Final R indexes [I>=2σ (I)] | R1 = 0.0450, wR2 = 0.0980 |
| Final R indexes [all data] | R1 = 0.0786, wR2 = 0.1126 |
| Largest diff. peak/hole / e Å-3 | 0.39/-0.28 |

**Supplementary Table 3**. Crystal data and structure refinement for C4ViIm. **CCDC#2455762**

| Empirical formula | C28H42N6Cl4 |
| --- | --- |
| Formula weight | 666.54 |
| Temperature/K | 100.0(2) |
| Crystal system | triclinic |
| Space group | P-1 |
| a/Å | 9.4745(5) |
| b/Å | 9.6049(5) |
| c/Å | 10.6530(6) |
| α/° | 63.718(2) |
| | β/° | | --- | | | 78.672(2) | | --- | |
| γ/° | 83.915(2) |
| Volume/Å3 | 852.09(8) |
| Z | 1 |
| ρcalc g/cm3 | 1.299 |
| μ/mm‑1 | 0.384 |
| F(000) | 354.0 |
| Crystal size/mm3 | 0.25 × 0.23 × 0.19 |
| Radiation | MoKα (λ = 0.71073) |
| 2θ range for data collection/° | 4.326 to 61.056 |
| Index ranges | -13 ≤ h ≤ 13, -13 ≤ k ≤ 13, -15 ≤ l ≤ 15 |
| Reflections collected | 32874 |
| Independent reflections | 5207 [Rint = 0.0636, Rsigma = 0.0408] |
| Data/restraints/parameters | 5207/1/205 |
| Goodness-of-fit on F2 | 1.134 |
| Final R indexes [I>=2σ (I)] | R1 = 0.0430, wR2 = 0.0890 |
| Final R indexes [all data] | R1 = 0.0561, wR2 = 0.0932 |
| Largest diff. peak/hole / e Å-3 | 0.43/-0.35 |

**Supplementary Table 4.** Bond lengths for C2ViIm.

| Atom | Atom | Length/Å |  | Atom | Atom | Length/Å |
| --- | --- | --- | --- | --- | --- | --- |
| N1 | C1 | 1.461(2) |  | N3 | C9 | 1.341(2) |
| N1 | C2 | 1.324(2) |  | C3 | C4 | 1.509(2) |
| N1 | C11 | 1.371(2) |  | C5 | C6 | 1.378(2) |
| N2 | C2 | 1.327(2) |  | C6 | C7 | 1.399(2) |
| N2 | C3 | 1.465(2) |  | C7 | C71 | 1.483(3) |
| N2 | C10 | 1.377(2) |  | C7 | C8 | 1.392(2) |
| N3 | C4 | 1.479(2) |  | C8 | C9 | 1.375(2) |
| N3 | C5 | 1.346(2) |  | C10 | C11 | 1.352(3) |

| **Supplementary** **Table 5**. Bond angles for C2ViIm. | | | | | | | | |
| --- | --- | --- | --- | --- | --- | --- | --- | --- |
| Atom | Atom | Atom | Angle/˚ |  | Atom | Atom | Atom | Angle/˚ |
| C2 | N1 | C1 | 124.74(17) |  | N3 | C4 | C3 | 109.38(14) |
| C2 | N1 | C11 | 108.87(15) |  | N3 | C5 | C6 | 120.40(15) |
| C11 | N1 | C1 | 126.34(16) |  | C5 | C6 | C7 | 119.77(15) |
| C2 | N2 | C3 | 124.86(15) |  | C6 | C7 | C71 | 121.09(17) |
| C2 | N2 | C10 | 108.92(14) |  | C8 | C7 | C6 | 118.03(14) |
| C10 | N2 | C3 | 126.15(16) |  | C8 | C7 | C71 | 120.88(17) |
| C5 | N3 | C4 | 119.93(14) |  | C9 | C8 | C7 | 119.90(14) |
| C9 | N3 | C4 | 118.97(14) |  | N3 | C9 | C8 | 120.68(14) |
| C9 | N3 | C5 | 121.10(14) |  | C11 | C10 | N2 | 106.56(16) |
| N1 | C2 | N2 | 108.44(15) |  | C10 | C11 | N1 | 107.21(15) |
| N2 | C3 | C4 | 109.80(14) |  |  |  |  |  |

**Supplementary** **Table 6**. Bond lengths for C3ViIm.

| Atom | Atom | Length/Å |  | Atom | Atom | Length/Å |
| --- | --- | --- | --- | --- | --- | --- |
| N1 | C1 | 1.461(2) |  | C3 | C4 | 1.517(2) |
| N1 | C2 | 1.325(2) |  | C4 | C5 | 1.519(2) |
| N1 | C11 | 1.370(2) |  | C6 | C7 | 1.377(2) |
| N2 | C2 | 1.326(2) |  | C7 | C8 | 1.390(2) |
| N2 | C3 | 1.466(2) |  | C8 | C81 | 1.486(3) |
| N2 | C12 | 1.372(2) |  | C8 | C9 | 1.397(2) |
| N3 | C5 | 1.485(2) |  | C9 | C10 | 1.375(2) |
| N3 | C6 | 1.337(2) |  | C11 | C12 | 1.350(3) |
| N3 | C10 | 1.345(2) |  |  |  |  |

**Supplementary** **Table 7**. Bond angles for C3ViIm.

| Atom | Atom | Atom | Angle/˚ |  | Atom | Atom | Atom | Angle/˚ |
| --- | --- | --- | --- | --- | --- | --- | --- | --- |
| C2 | N1 | C1 | 125.53(16) |  | C3 | C4 | C5 | 106.37(15) |
| C2 | N1 | C11 | 108.47(15) |  | N3 | C5 | C4 | 112.98(14) |
| C11 | N1 | C1 | 125.84(16) |  | N3 | C6 | C7 | 120.63(16) |
| C2 | N2 | C3 | 124.39(16) |  | C6 | C7 | C8 | 120.46(16) |
| C2 | N2 | C12 | 108.57(15) |  | C7 | C8 | C81 | 121.39(19) |
| C12 | N2 | C3 | 126.99(16) |  | C7 | C8 | C9 | 117.36(15) |
| C6 | N3 | C5 | 119.75(15) |  | C9 | C8 | C81 | 121.24(19) |
| C6 | N3 | C10 | 120.68(15) |  | C10 | C9 | C8 | 120.10(16) |
| C10 | N3 | C5 | 119.51(15) |  | N3 | C10 | C9 | 120.71(16) |
| N1 | C2 | N2 | 108.77(16) |  | C12 | C11 | N1 | 107.25(16) |
| N2 | C3 | C4 | 112.44(16) |  | C11 | C12 | N2 | 106.93(16) |

**Supplementary** **Table 8**. Bond lengths for C4ViIm.

| Atom | Atom | Length/Å |  | Atom | Atom | Length/Å |
| --- | --- | --- | --- | --- | --- | --- |
| O1 | C14 | 1.435(16) |  | N3 | C7 | 1.3458(19) |
| O1A | C14A | 1.424(16) |  | N3 | C11 | 1.3426(19) |
| C14 | C15 | 1.501(6) |  | C3 | C4 | 1.520(2) |
| C14A | C15A | 1.494(6) |  | C4 | C5 | 1.530(2) |
| N1 | C1 | 1.469(2) |  | C5 | C6 | 1.517(2) |
| N1 | C2 | 1.327(2) |  | C7 | C8 | 1.372(2) |
| N1 | C12 | 1.377(2) |  | C8 | C9 | 1.398(2) |
| N2 | C2 | 1.331(2) |  | C9 | C91 | 1.488(3) |
| N2 | C3 | 1.4695(19) |  | C9 | C10 | 1.396(2) |
| N2 | C13 | 1.380(2) |  | C10 | C11 | 1.376(2) |
| N3 | C6 | 1.4821(19) |  | C12 | C13 | 1.355(2) |

**Supplementary** **Table 9**. Bond angles for C4ViIm.

| Atom | Atom | Atom | Angle/˚ |  | Atom | Atom | Atom | Angle/˚ |
| --- | --- | --- | --- | --- | --- | --- | --- | --- |
| O1 | C14 | C15 | 107.9(19) |  | C3 | C4 | C5 | 113.50(13) |
| O1A | C14A | C15A | 110.5(17) |  | C6 | C5 | C4 | 111.96(14) |
| C2 | N1 | C1 | 124.35(14) |  | N3 | C6 | C5 | 110.35(13) |
| C2 | N1 | C12 | 108.98(13) |  | N3 | C7 | C8 | 120.68(14) |
| C12 | N1 | C1 | 126.59(14) |  | C7 | C8 | C9 | 120.01(14) |
| C2 | N2 | C3 | 125.06(13) |  | C8 | C9 | C91 | 120.80(16) |
| C2 | N2 | C13 | 108.57(13) |  | C10 | C9 | C8 | 117.81(13) |
| C13 | N2 | C3 | 126.35(13) |  | C10 | C9 | C91 | 121.38(16) |
| C7 | N3 | C6 | 119.73(13) |  | C11 | C10 | C9 | 119.93(14) |
| C11 | N3 | C6 | 119.40(13) |  | N3 | C11 | C10 | 120.70(14) |
| C11 | N3 | C7 | 120.87(13) |  | C13 | C12 | N1 | 106.86(14) |
| N1 | C2 | N2 | 108.56(14) |  | C12 | C13 | N2 | 107.03(14) |
| N2 | C3 | C4 | 110.40(12) |  |  |  |  |  |


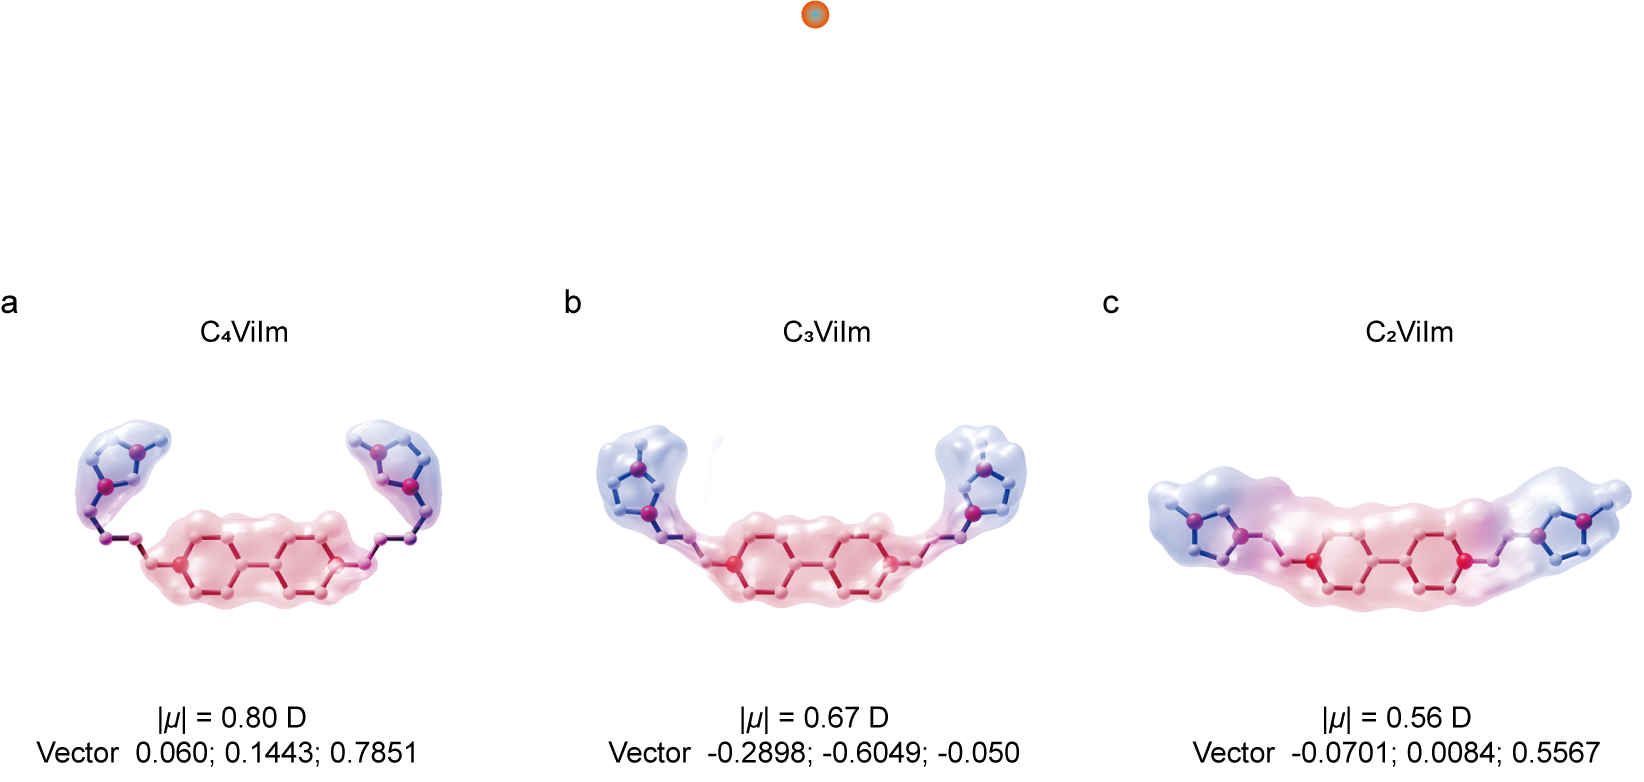


**Supplementary Figure 14**. DFT calculations of the strong donor-acceptor interaction-induced dipole moment (μ).


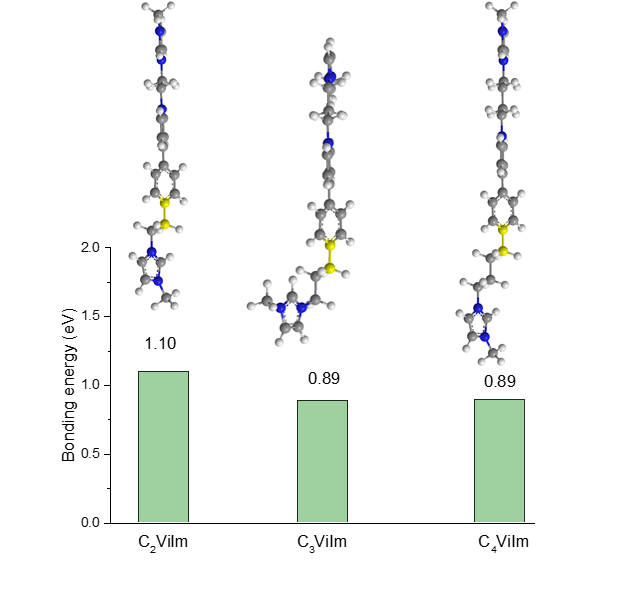


**Supplementary Figure 15**. DFT calculations showing the C−N of electrolytes with the binding energy.


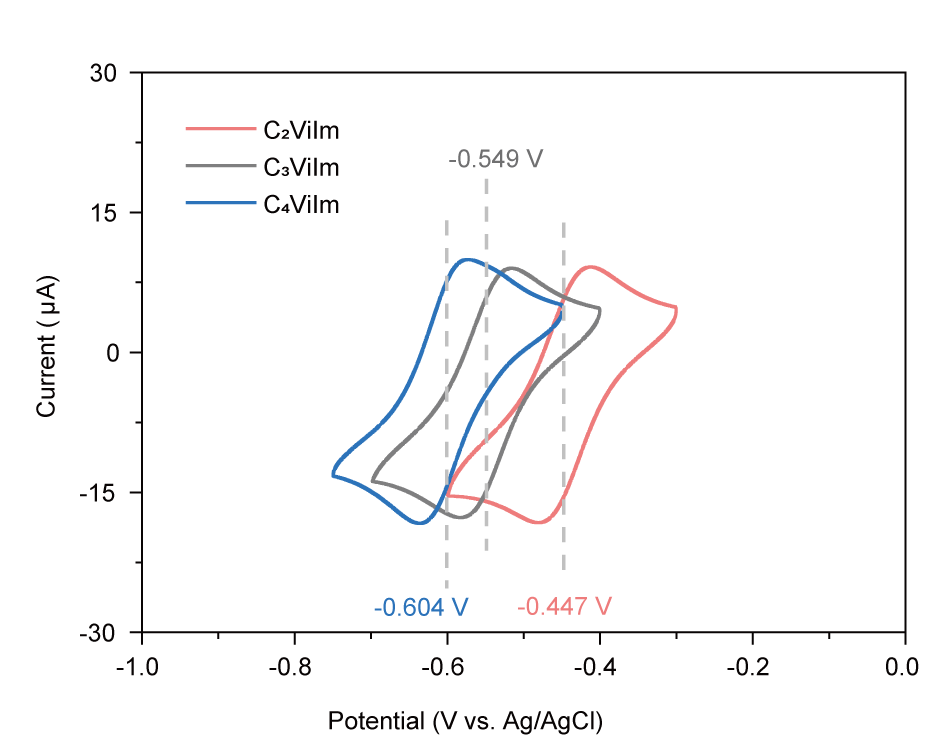


**Supplementary Figure 16**. Cyclic voltammetry of C2ViIm, C3ViIm and C4ViIm in 0.5 M NaCl (scanned at 100 mV s−1).


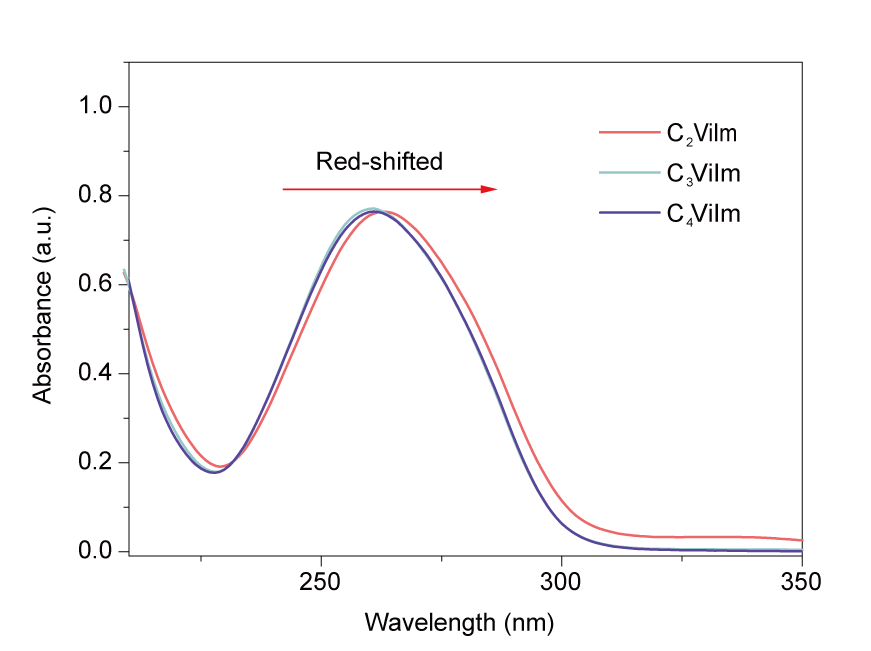


**Supplementary Figure 17**. UV–Vis spectrum of C2ViIm, C3ViIm and C4ViIm in water.


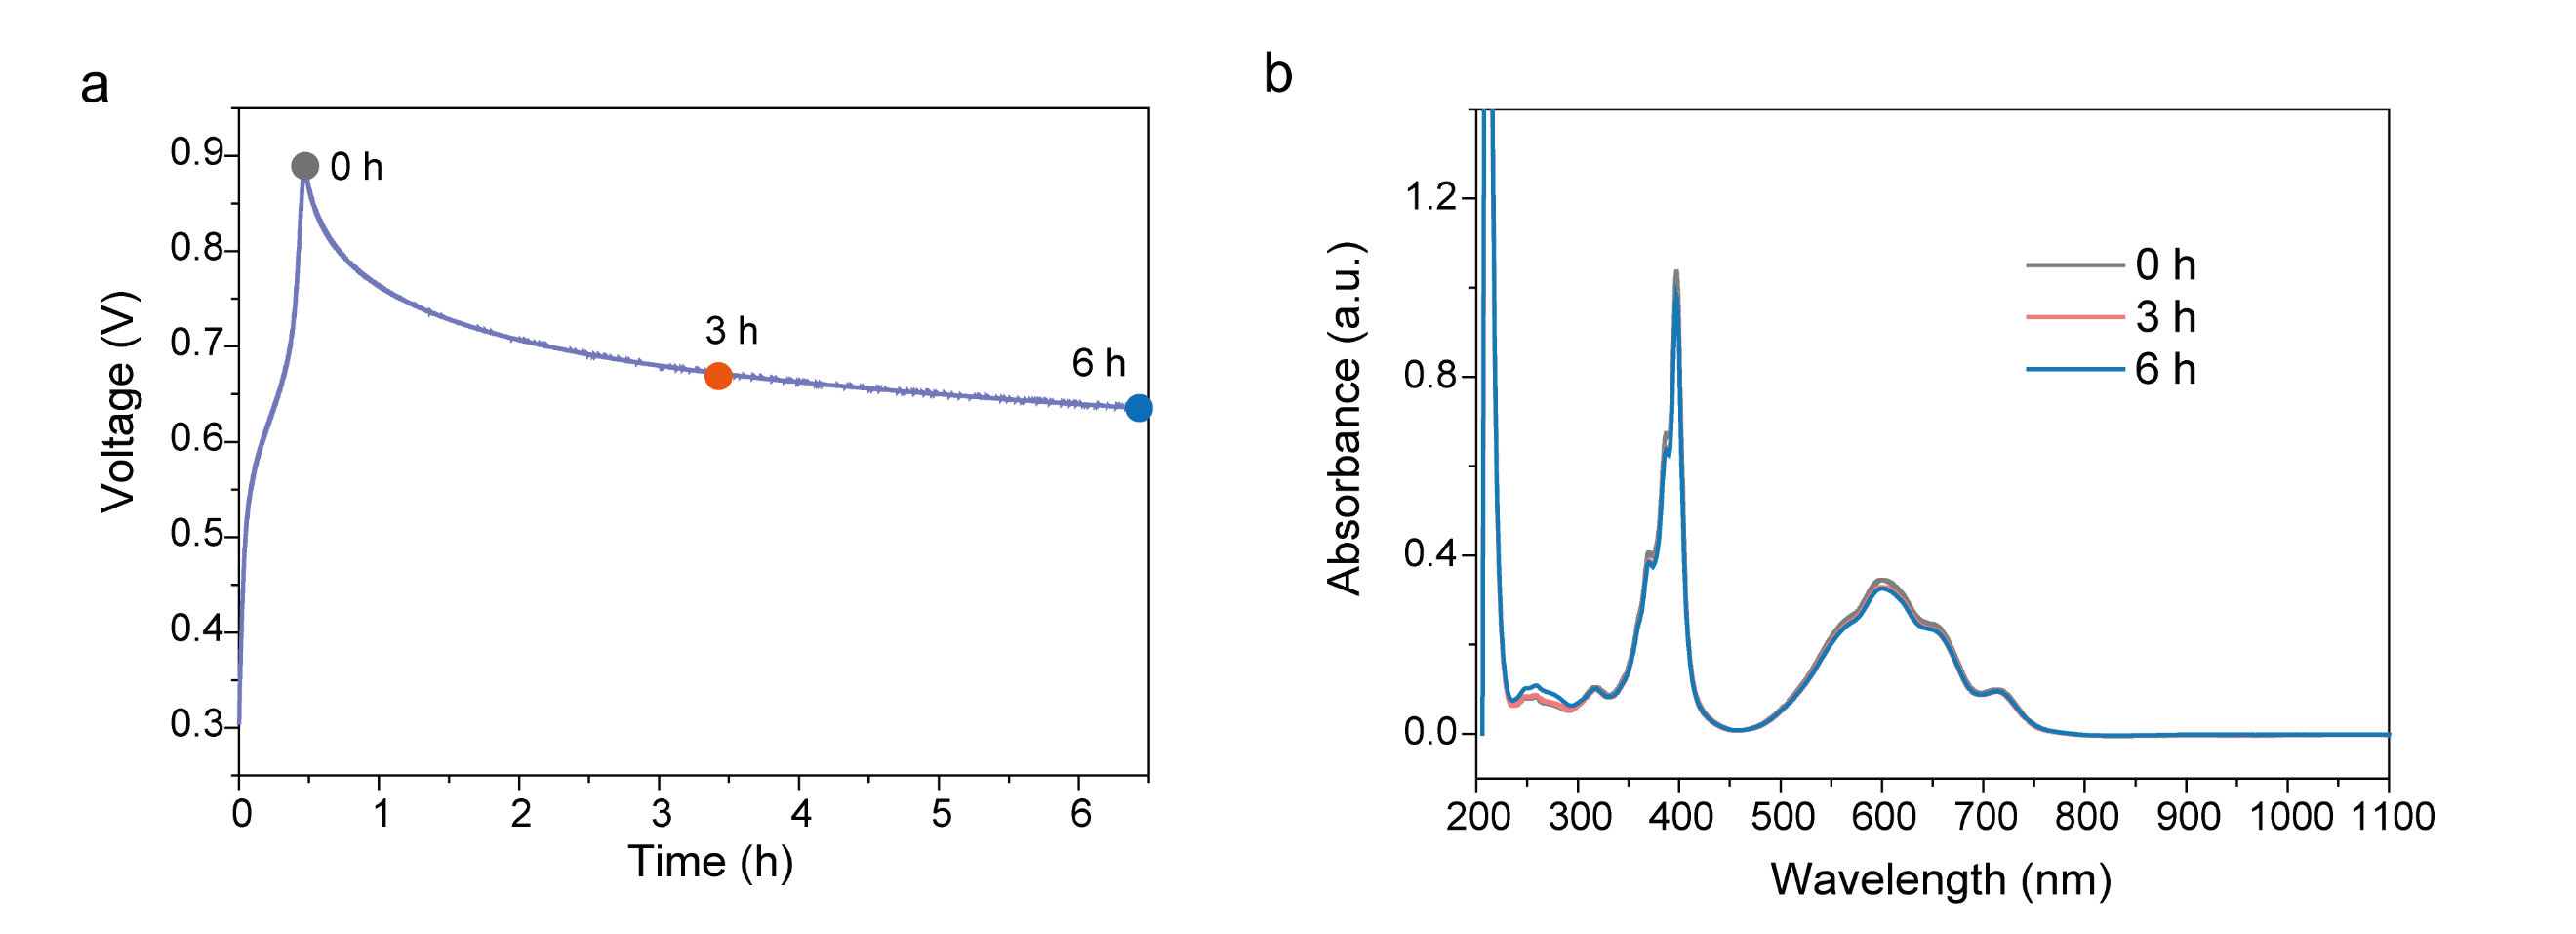


**Supplementary Figure 18**. (a) The corresponding charge curve of BTMAP−Fc/C2ViIm flow battery. (b) Ultraviolet-visible (UV−Vis) spectroscopy measurement at charge state of C2ViIm.

**Notes**: The stability of C2ViIm in the charging state was tested by ex-situ UV−Vis. The BTMAP−Fc/C2ViIm flow battery was first charged to 0.9 V, and then UV−Vis was tested at 0, 3 and 6 hours. The results showed no significant changes, indicating that C2ViIm has good stability in the charging state.

**Solubility measurements**

The solubility of CnViIm was measured by adding excess electrolytes into deionized water to form saturated solution with precipitation, and then measured by UV-vis spectrophotometry according to the established absorbance concentration calibration curves.

**Permeability measurements**

The membrane permeability of CnViIm was tested with aH-typed electrolytic cell setup, which is separated by a piece of fresh treated anion-exchange DSV membrane. 5 mL solution of 0.1 M CnViIm in 2 M NaCl was placed on one storage tank as the donating side, while the other storage tank filled with 5 mL 2 M NaCl was used as the receiving side. The crossover of the CnViIm species was periodically monitored by measuring the concentration of CnViIm in the receiving side by UV-vis. The permeability of each redox active species was calculated using Fick’s Law17:

where P is the permeability (cm2 s-1), Ct is the CnViIm concentration measured at the receiving side at time t, C0 is the initial concentration of CnViIm on the donating side, in our case 0.1 M. V0 is the initial volume on either the receiving or donating sides, since they are equal. In this case 5 mL. A is the effective area of the membrane (0.785 cm2), L is the thickness of the membrane (50 μM for anion-exchange DSV) and t is time (s). Note that for CxViIm with DSV membrane, the crossover was detected after over 4 months, resulting in insignificant permeability coefficient on the order of magnitude 10−11 or 10−12.

**Electrochemical studies**

All electrochemical tests were performed before nitrogen removal of oxygen from the solution. The CV was recorded with a three-electrode cell equipped with glassy carbon working electrode (diameter: 3 mm), platinum column counter electrode and Ag/AgCl reference electrode. The glassy carbon working electrode was polished with 0.3 μm alumina powder and washed in DI water before the experiment. The redox active species were dissolved in 0.5 M NaCl aqueous solution for CV testing an electrochemical station from CH Instrument Inc (CHI 706E) recorded CV data at a scan rate of 100 mV s−1.

The rotating disc electrode (RDE, Pine MSR) was employed to measure the diffusion coefficients. Glassy carbon disk with a 5-mm-diameter was used as the working electrode. Platinum column and Ag/AgCl electrode were used counter electrode and reference electrode, respectively. The experiments were measured in 0.5 M NaCl aqueous solution. Linear sweeping voltammetry (LSV) data were collected at a scan rate of 5 mV s−1. The Levich equation was applied to determine the diffusion coefficients.

where the electron transfer number n = 2, F = 96485 C mol−1, C0 = 1.0 × 10−6 mol cm−3, A = 0.1963 cm2, and the kinematic viscosity *ν* = 0.01 cm2 s−1 for a 0.5 M NaCl solution (T = 293 K). The diffusion coefficient (*D*) was calculated for CxViIm.

The kinetics-controlled current, represented by *ik*, was obtained by taking the reciprocal of the vertical axis intercepts from the linear relationship between *i*−*1* and *ω*−*1/2* against the overpotentials. A Tafel plot was generated by plotting log(*ik*) at different overpotentials, which resulted in a y-axis intercept equal to the log(*i0*). The reaction rate constant (*k0*) was then determined using Equation.

**Flow battery testing**

For the symmetric cell measurements, all measurements of battery test were performed in an argon-filled glovebox (O2 < 0.1 ppm). The flow cell was assembled with pretreated Selemion DSV or AMV membrane, home-made poly(tetrafluoroethylene) (PTFE) frame, three pieces of 39AA carbon paper electrodes (size 4 cm2, thickness of 3.2 mm, AvCarb Material Solutions Co.), Poco graphite plate with single serpentine channel (Fuel Cell Technologies Inc.) and cupper current collector. Before the cell assembly, DSV or AMV membrane were soaked in 2 M NaCl aqueous solution for 48 h. The carbon paper electrodes were pretreated at 400 ℃ in air for 6 h before use. The Longer peristaltic pump is used to circulate active electrolytes (46 mL min−1).

In symmetrical cell, 0.1 M CnViIm dissolved in 2 M NaCl (precharged to 50% SOC of first electron reduction, using BTMAP-Fc as counter cathode in bulk electrolysis) was used on both sides, separated by a Selemion AMV anion exchange membrane. Galvanostatic cycling with potential limitation was used in the symmetric cell cycling test with a current density of 2.5 mA·cm−2 and a voltage cutoff of ±0.125 V to avoid triggering the second redox state.

For the full cell measurements, all measurements of battery test follow the symmetric cell measurements. The flow cell was assembled with pretreated DSV membrane. The flow cell was galvanostatically charged and discharged at assigned current density under room temperature on an Arbin LBT battery tester (Arbin Instruments). All post analysis in full cell is done by discharging the flow battery until the voltage is lower than the open circuit voltage.


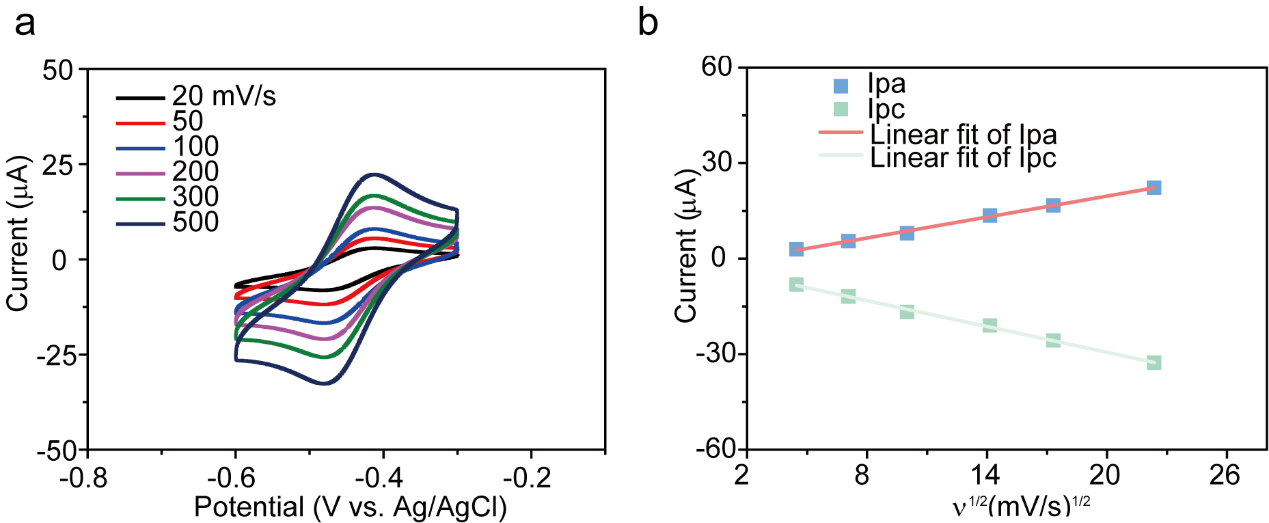


**Supplementary Figure 19**. (a) Cyclic voltammograms of 1.0 mM C2ViIm in 0.5 M NaCl at various scan rates from 20 to 500 mV s−1. (b) Corresponding plots of Ipa and Ipc versus the square root of scan rates.


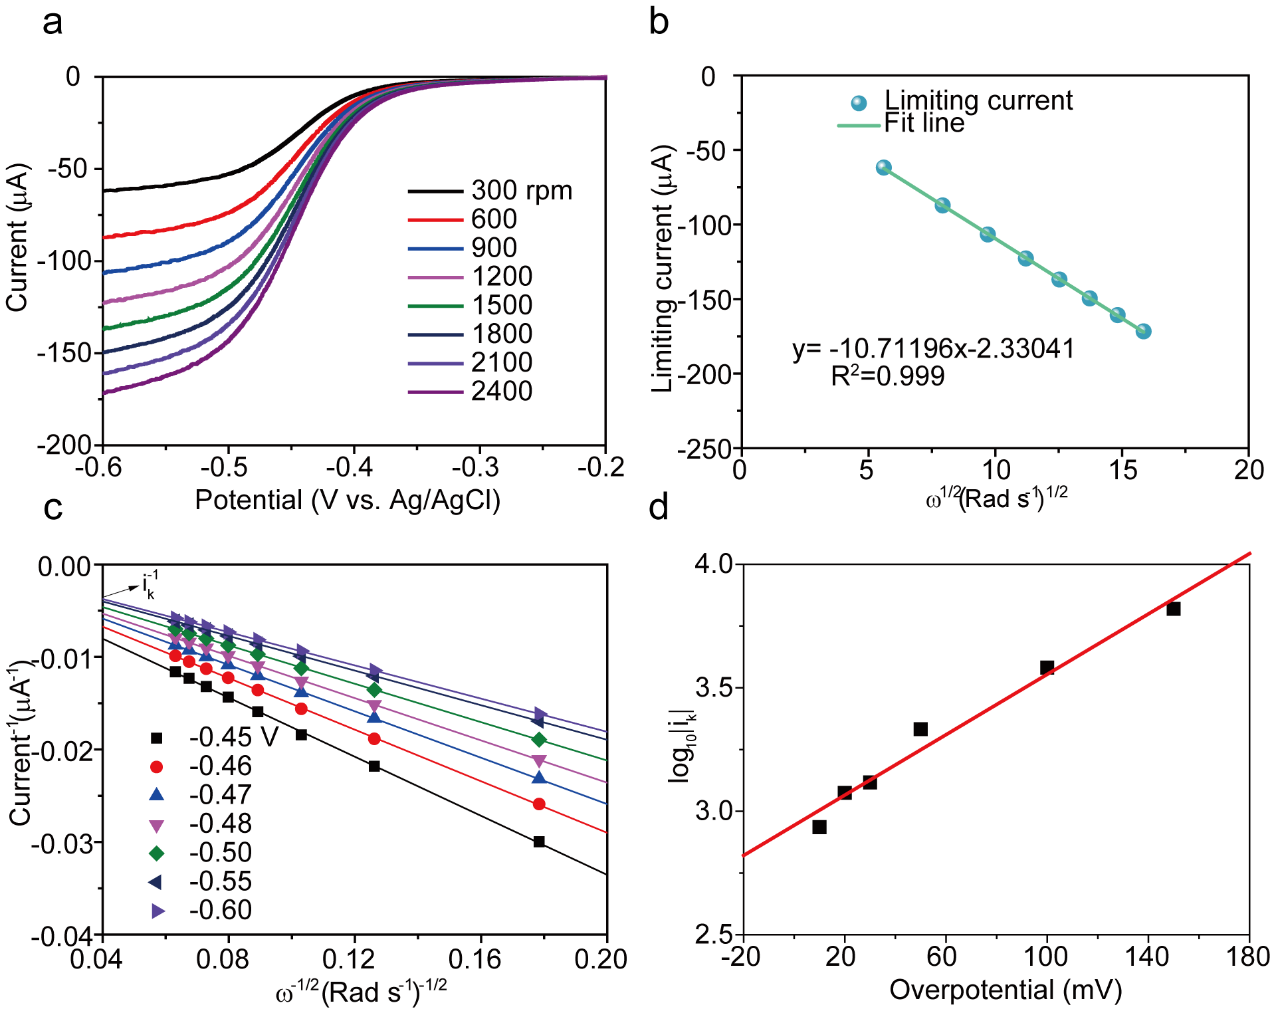


**Supplementary Figure 20**. LSV measurements of C2ViIm. (a) Current versus potential at rotation rates from 300 to 2400 rpm with potential sweeping rate of 5 mV s−1. (b) Levich plot (limiting current versus square root of rotation rate). (c) Koutecky-Levich plot at different overpotentials. (d) Tafel plot, the logarithm of kinetically limited current versus overpotential. According to the experimental data, the *D0* and *k0* of C2ViIm are 4.01×10−6 cm2 s−1 and 0.0230 cm s−1, respectively.


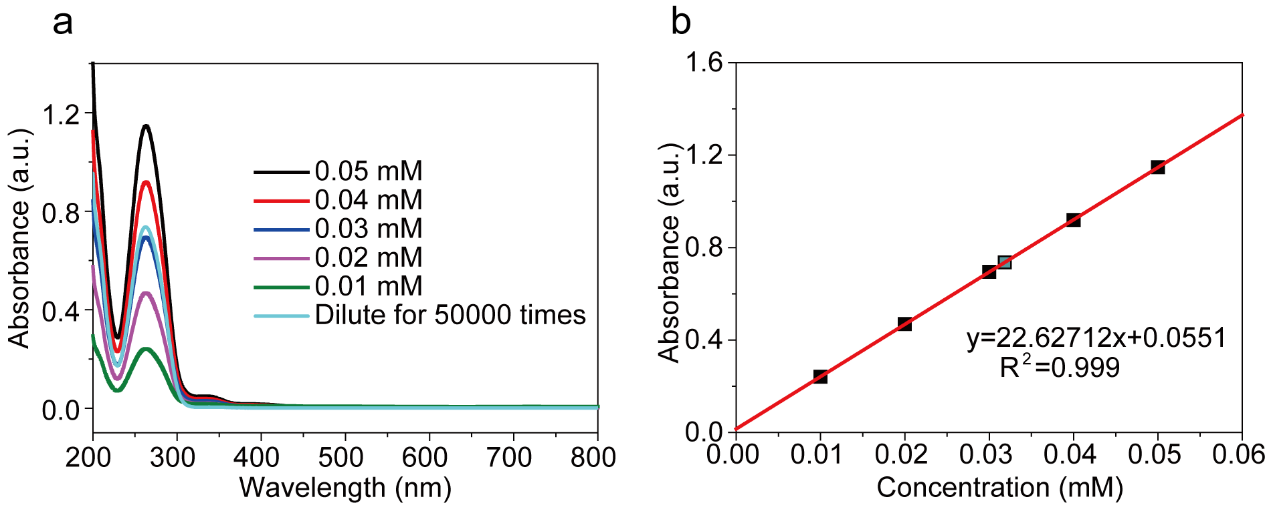


**Supplementary Figure 21**. (a) UV-Vis spectra of C2ViIm at various concentrations in H2O. (b) The fitted calibration curve of 0.01, 0.02, 0.03, 0.04, and 0.05 mM concentrations. The green dot represents the solubility for the tested sample.


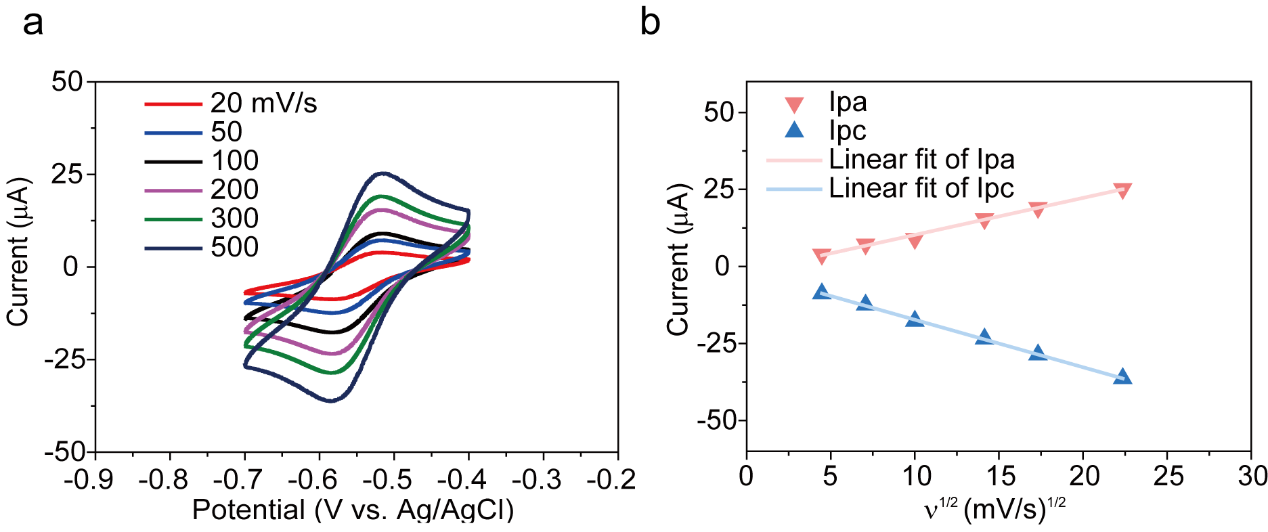


**Supplementary Figure 22**. (a) Cyclic voltammograms of 1.0 mM C3ViIm in 0.5 M NaCl at various scan rates from 20 to 500 mV s−1. (b) Corresponding plots of Ipa and Ipc versus the square root of scan rates.


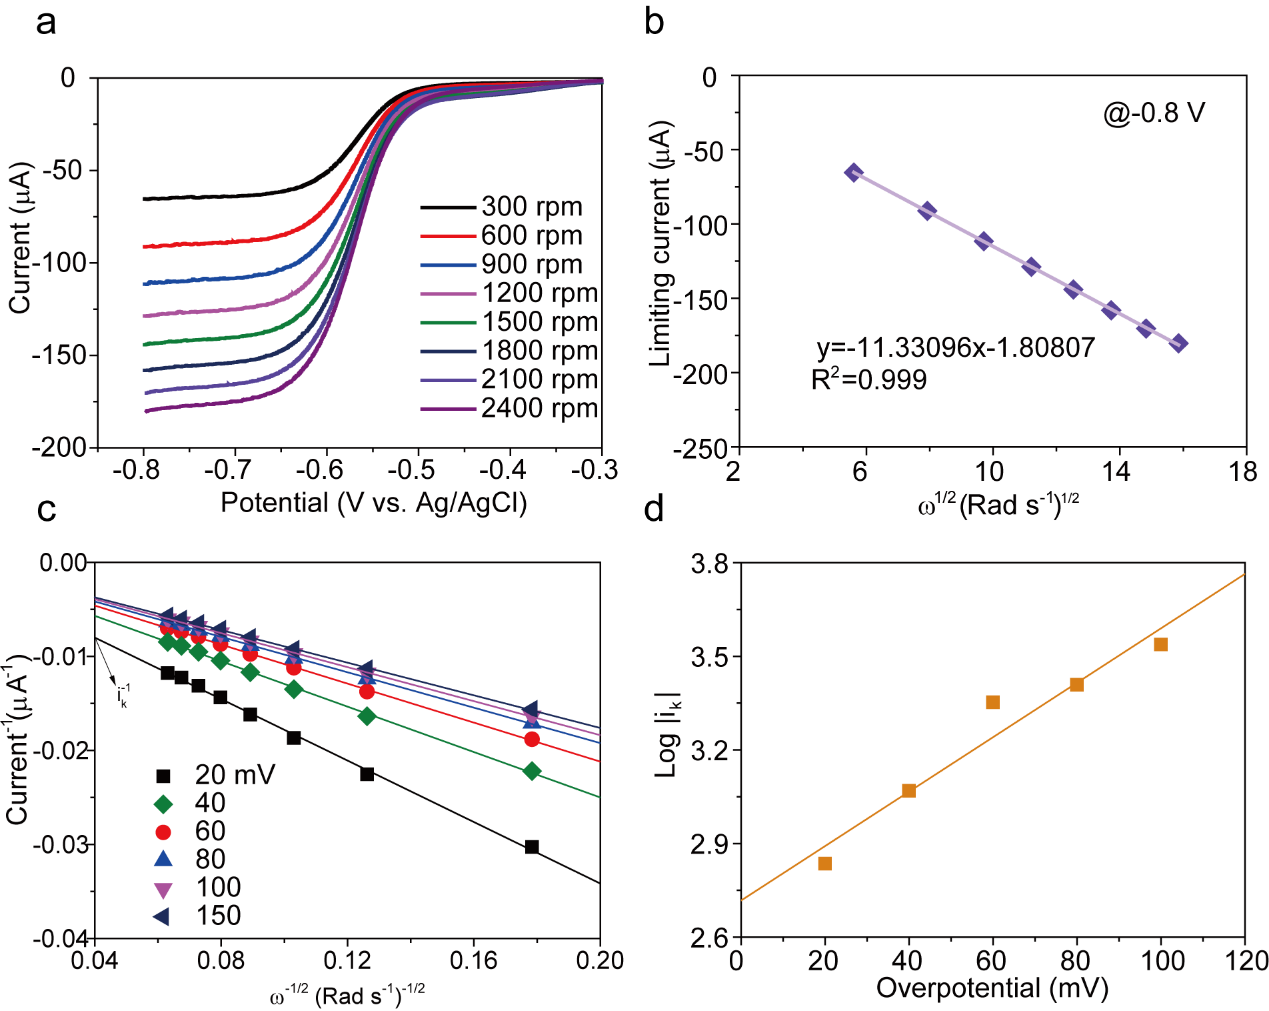


**Supplementary Figure 23**. LSV measurements of C3ViIm. (a) Current versus potential at rotation rates from 300 to 2400 rpm with potential sweeping rate of 5 mV s−1. (b) Levich plot (limiting current versus square root of rotation rate). (c) Koutecky-Levich plot at different overpotentials. (d) Tafel plot, the logarithm of kinetically limited current versus overpotential. According to the experimental data, the *D0* and *k0* of C3ViIm are 3.37×10−6 cm2 s−1 and 0.014 cm s−1, respectively.


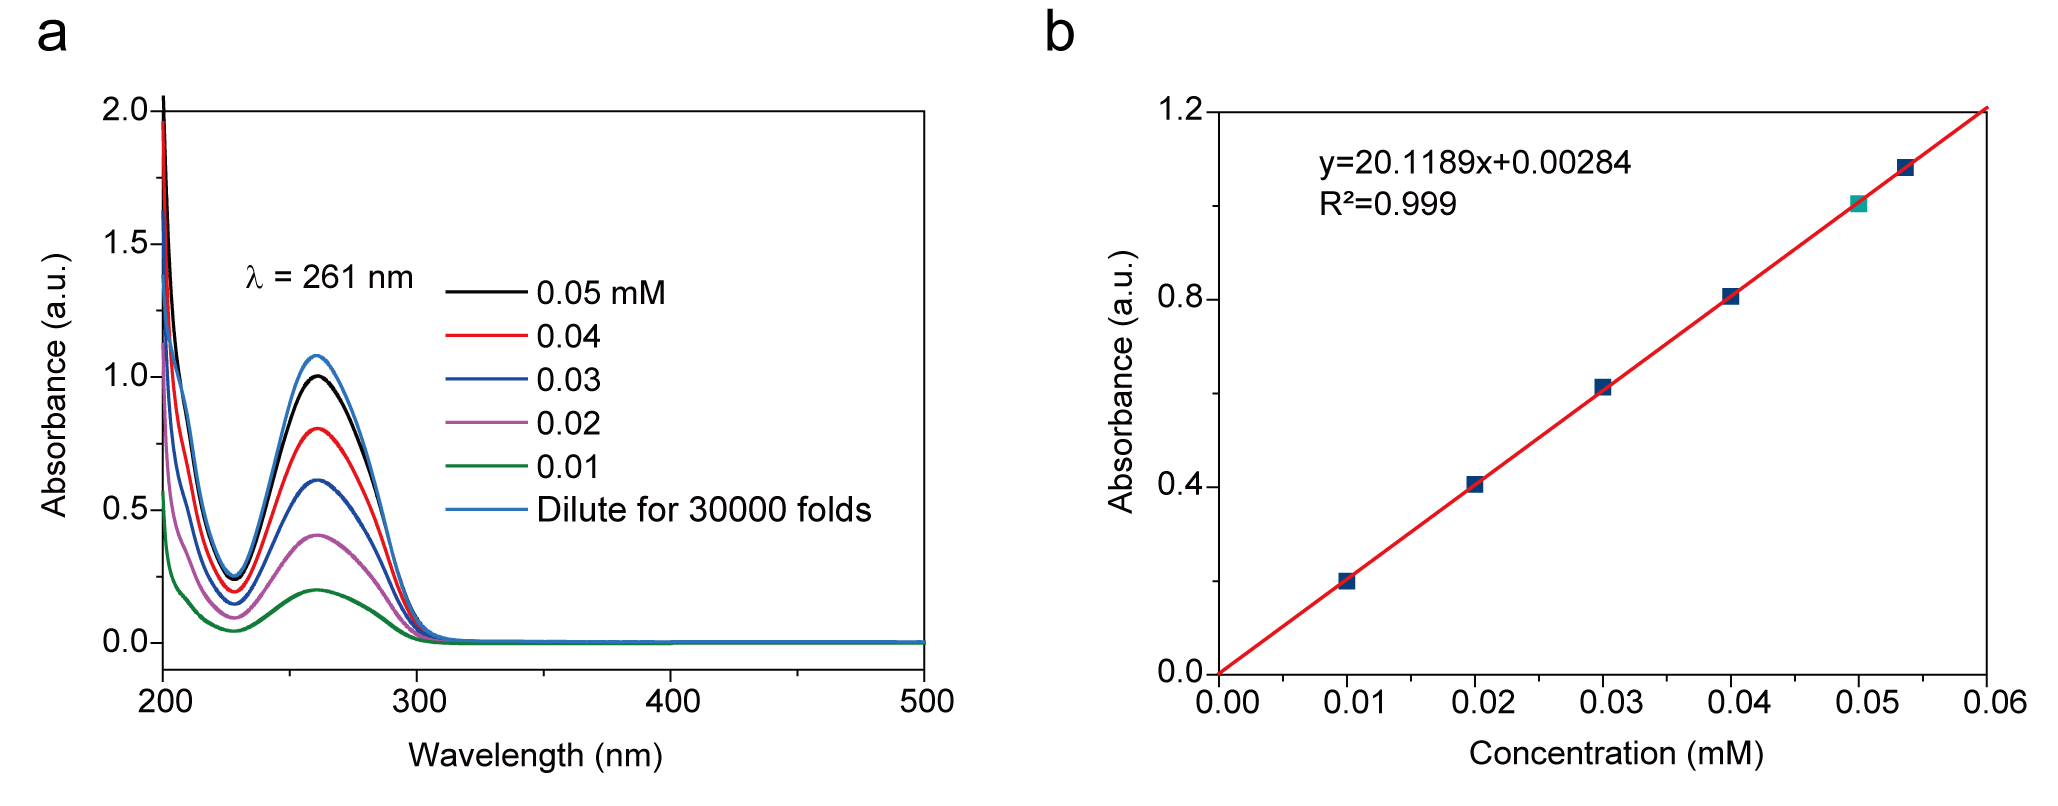


**Supplementary Figure 24**. (a) UV-Vis spectra of C3ViIm at various concentrations in H2O. (b) The fitted calibration curve of 0.01, 0.02, 0.03, 0.04, and 0.05 mM concentrations. The green dot represents the solubility for the tested sample.


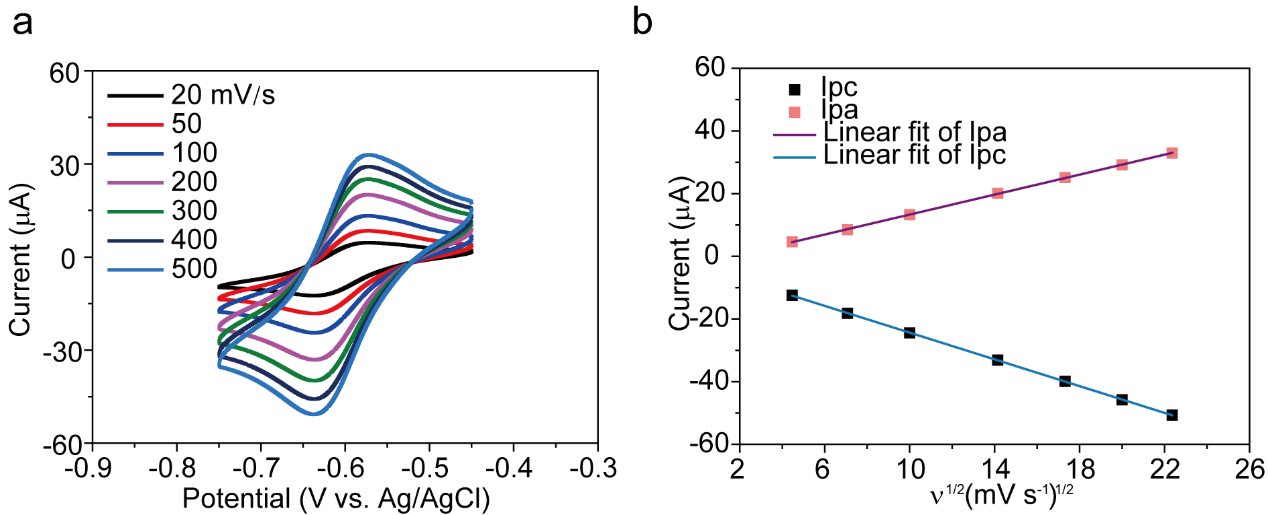


**Supplementary Figure 25**. (a) Cyclic voltammograms of 1.0 mM C4ViIm in 0.5 M NaCl at various scan rates from 20 to 500 mV s−1. (b) Corresponding plots of Ipa and Ipc versus the square root of scan rates.


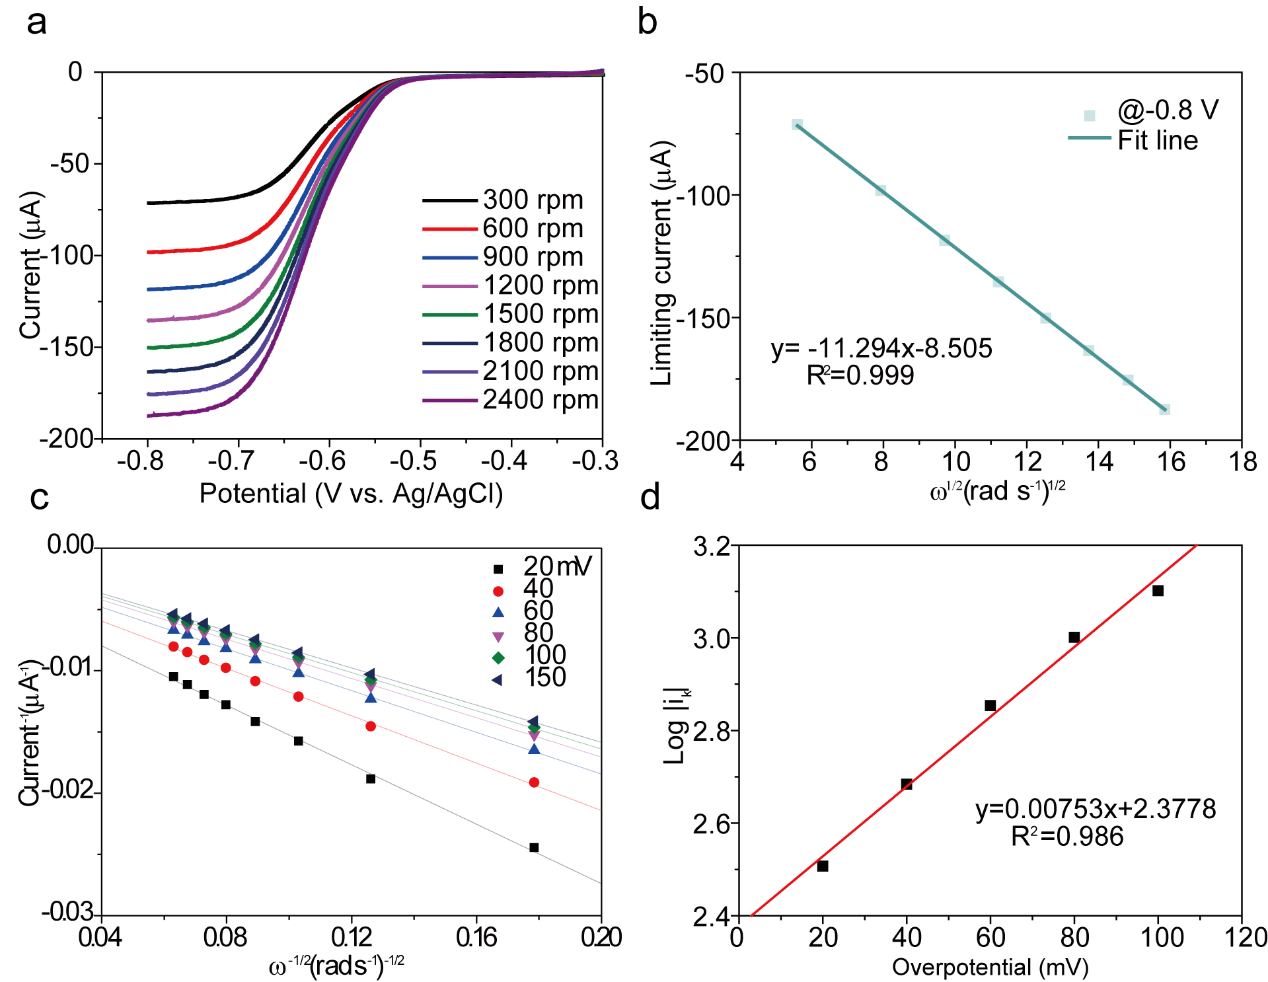


**Supplementary Figure 26**. LSV measurements of C4ViIm. (a) Current versus potential at rotation rates from 300 to 2400 rpm with potential sweeping rate of 5 mV s−1. (b) Levich plot (limiting current versus square root of rotation rate). (c) Koutecky-Levich plot at different overpotentials. (d) Tafel plot, the logarithm of kinetically limited current versus overpotential. According to the experimental data, the *D0* and *k0* of C4ViIm are 3.35×10−6 cm2 s−1 and 0.0060 cm s−1, respectively.


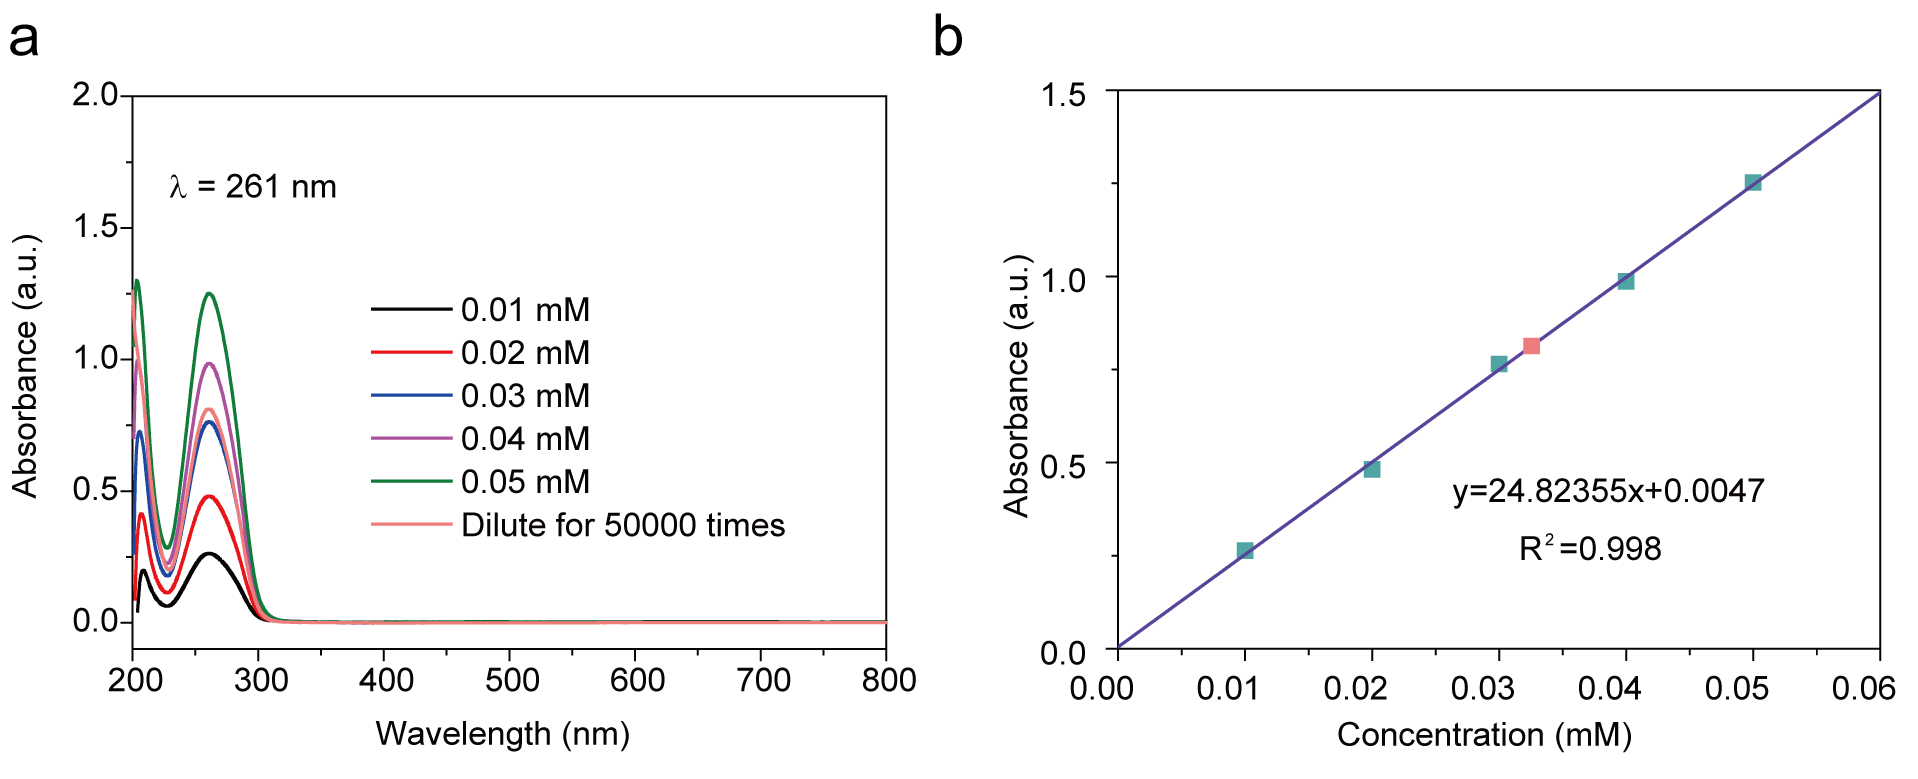


**Supplementary Figure 27**. (a) UV-Vis spectra of C4ViIm at various concentrations in H2O. (b) The fitted calibration curve of 0.01, 0.02, 0.03, 0.04, and 0.05 mM concentrations. The orange-red dot represents the solubility for the tested sample.

**Supplementary Table 10.** Summary of the physicochemical and electrochemical properties of C2ViIm, C3ViIm and C4ViIm.

| compound | Solubility  (mol L–1) | E1/2,V (Ag/AgCl) | D,cm2 s–1 | k0,cm s–1 | Permeability (cm2 s–1) |
| --- | --- | --- | --- | --- | --- |
| C2ViIm | 1.65 | –0.447 | 4.01×10–6 | 2.30×10–2 | 4.10×10–11 |
| C3ViIm | 1.63 | –0.549 | 3.37×10–6 | 1.40×10–2 | 2.47×10–11 |
| C4ViIm | 1.62 | -0.604 | 3.35×10–6 | 0.60×10–2 | 4.53×10–12 |

In 0.5 M NaCl, performed at room temperature. Solubility in H2O. E1/2, redox potential. D, diffusion coefficient. k0, electron-transfer rate constant.


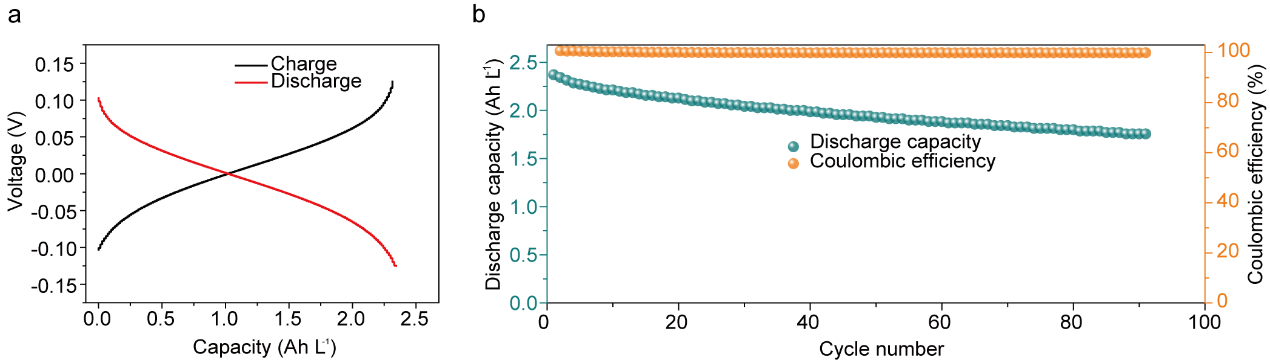


**Supplementary Figure 28**. Charge/discharge profiles of the C4ViIm symmetric AORFB at first cycle. The symmetric AORFB at 2.5 mA cm−2 with 0.1 M C4ViIm (supporting electrolyte, 2 M NaCl) electrolyte symmetric cell, the capacity limiting side consisting of 7 mL solution and the noncapacity limiting side consisting of 12 mL solution.

**Notes**: The symmetric flow battery was assembled with 0.1 M C4ViIm using a Selemion AMV membrane to evaluate the reliability and electrochemical stability of the C4ViIm in the charge/discharge cycling process at 2.5 mA cm−2. The 0.1 M C4ViIm symmetric flow battery produced a capacity of 2.34 Ah L−1 with a capacity retention of 75.1% (capacity fading rate of 0.274% per cycle) after 91 cycles (over 10 days) (Fig 3d). The Coulombic efficiency of the symmetric flow cell at 2.5 mA cm−2 current density is nearly 100%.


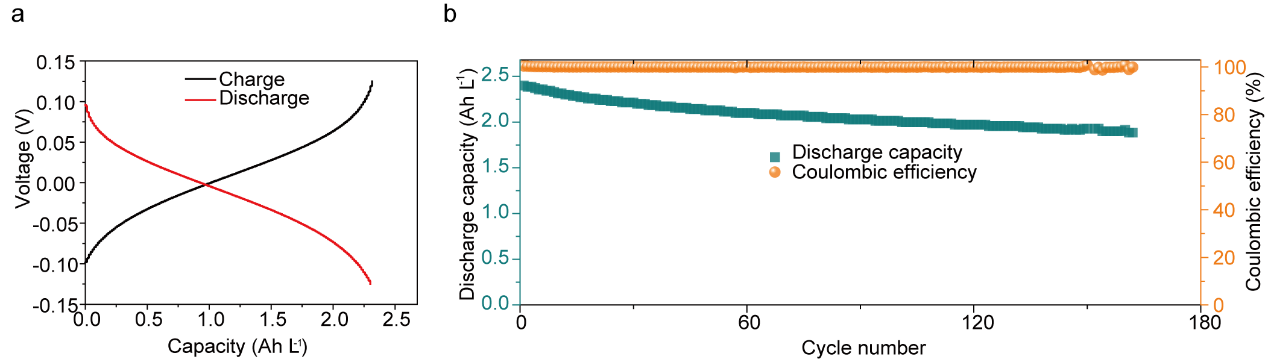


**Supplementary Figure 29**. Charge/discharge profiles of the C3ViIm symmetric AORFB at first cycle. The symmetric AORFB at 2.5 mA cm−2 with 0.1 M C3ViIm (supporting electrolyte, 2 M NaCl) electrolyte symmetric cell, the capacity limiting side consisting of 7 mL solution and the noncapacity limiting side consisting of 12 mL solution.

**Notes**: The symmetric flow battery was assembled with 0.1 M C3ViIm using a Selemion AMV membrane to evaluate the reliability and electrochemical stability of the C3ViIm in the charge/discharge cycling process at 2.5 mA cm−2. The 0.1 M C3ViIm symmetric flow battery produced a capacity of 2.30 Ah L−1 with a capacity retention of 81.9% (capacity fading rate of 0.113% per cycle) after 160 cycles (over 18 days) (Fig 3c). The Coulombic efficiency of the symmetric flow cell at 2.5 mA cm−2 current density is nearly 100%.


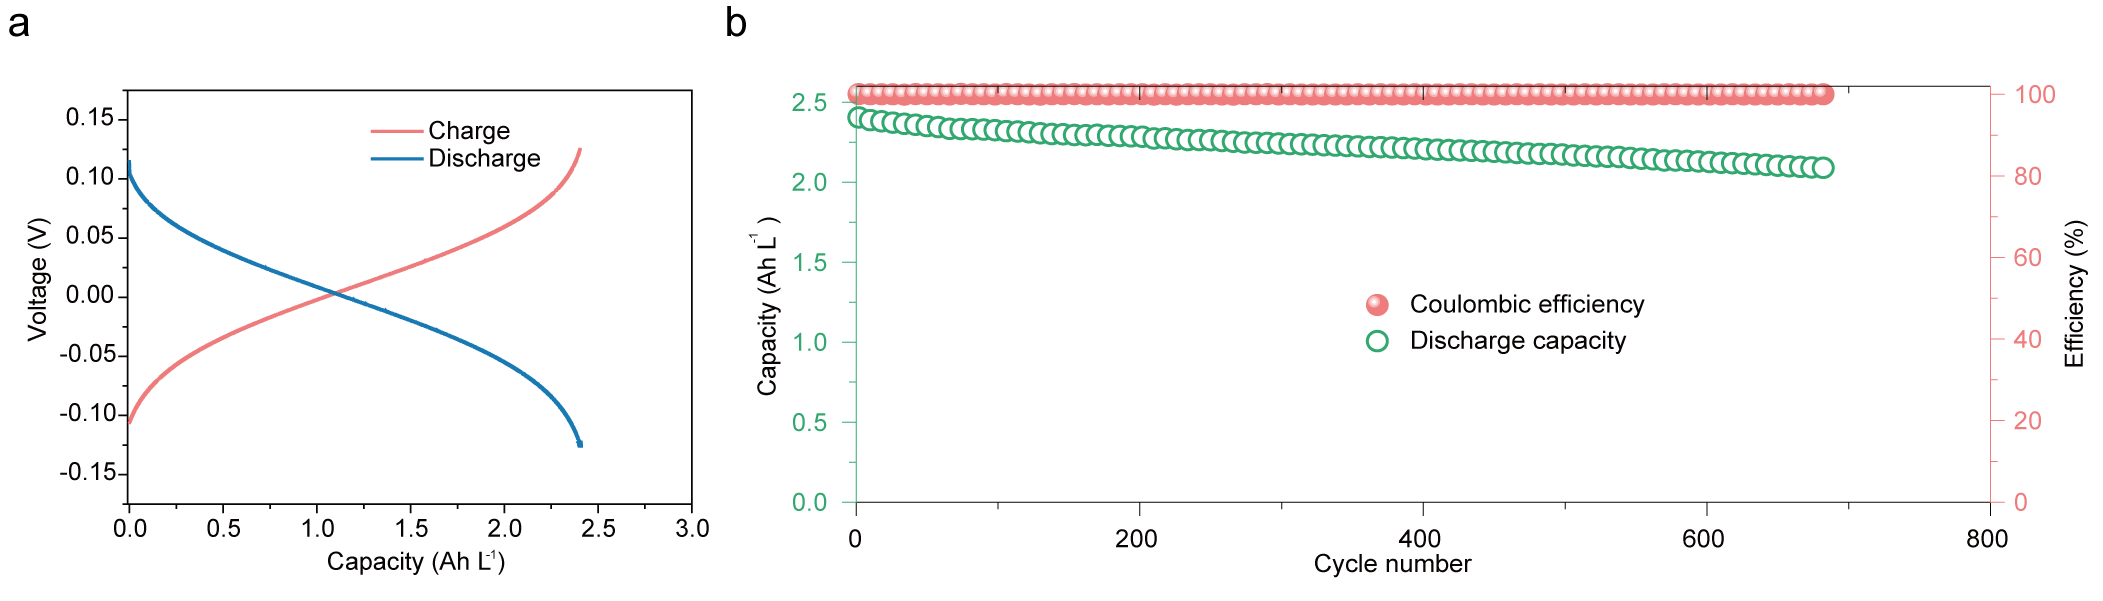


**Supplementary Figure 30**. Charge/discharge profiles of the C2ViIm symmetric AORFB at first cycle. The symmetric AORFB at 2.5 mA cm−2 with 0.1 M C2ViIm (supporting electrolyte, 2 M NaCl) electrolyte symmetric cell, the capacity limiting side consisting of 8 mL solution and the noncapacity limiting side consisting of 12 mL solution.

**Notes**: The symmetric flow battery was assembled with 0.1 M C2ViIm using a Selemion AMV membrane to evaluate the reliability and electrochemical stability of the C2ViIm in the charge/discharge cycling process at 2.5 mA cm−2. The 0.1 M C2ViIm symmetric flow battery produced a capacity of 2.40 Ah L−1 with a capacity retention of 87.2% (capacity fading rate of 0.018% per cycle) after 680 cycles (over 134 days) (Fig 3b). The Coulombic efficiency of the symmetric flow cell at 2.5 mA cm−2 current density is nearly 100%. The battery capacities of both C3ViIm and C4ViIm symmetric flow batteries were less than symmetric the capacity of the C2ViIm symmetric flow battery.


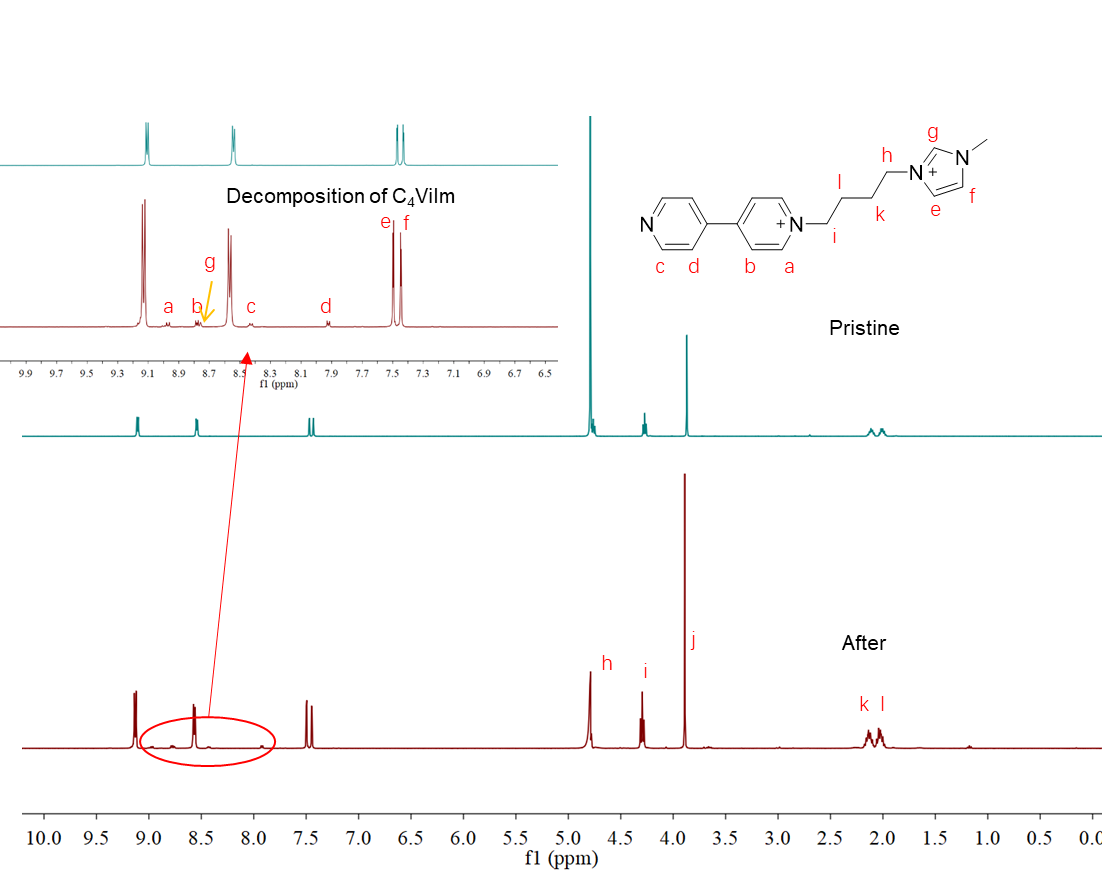


**Supplementary Figure 31**. 1H NMR (400MHz, D2O, 298 K) spectra comparison for symmetric C4ViIm anolyte AORFB after 90 cycles (0.1 M flow cell).


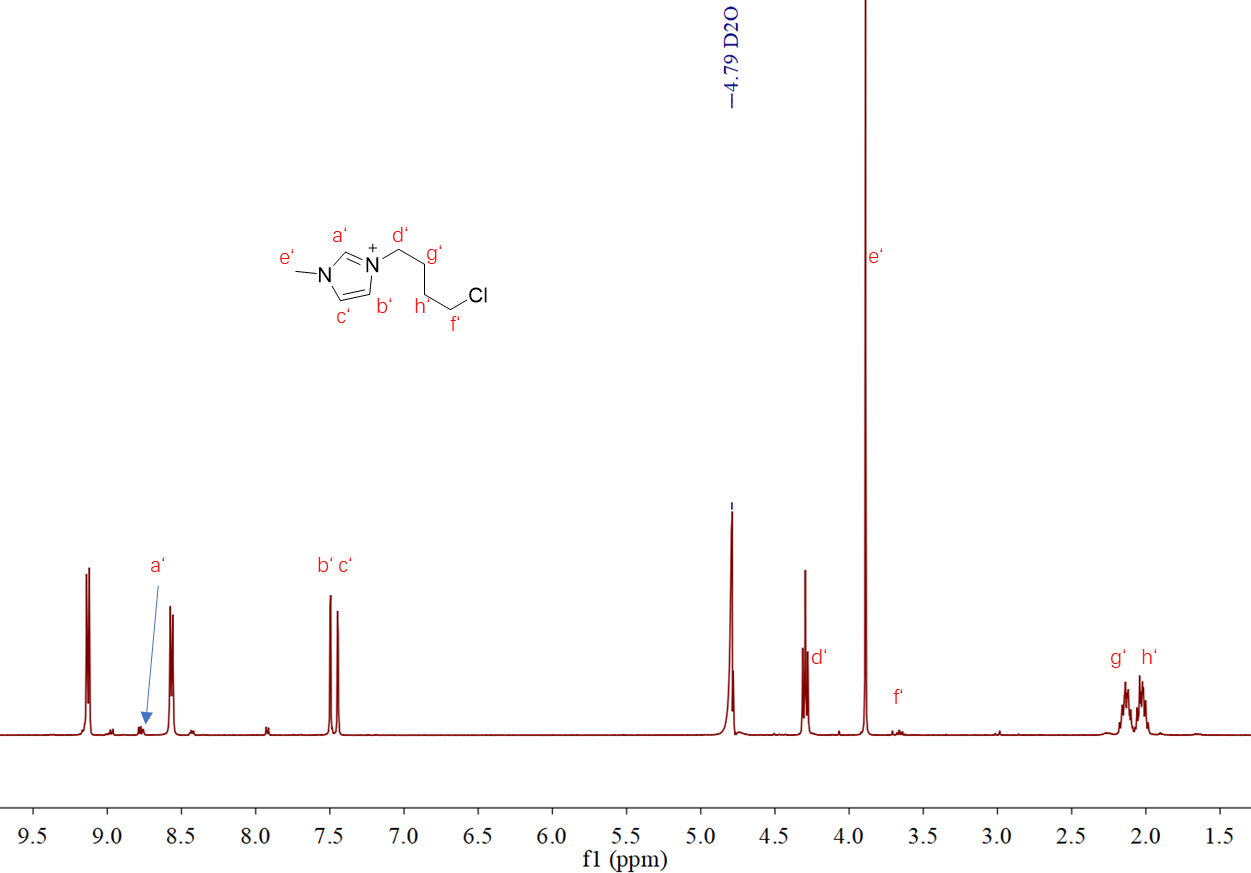
**Supplementary Figure 32**. 1H NMR (400MHz, D2O, 298 K) spectroscopy for symmetric C4ViIm anolyte AORFB after 90 cycles. The spectroscopy of C4ViIm after cycling was recorded in D2O with water suppression

**Notes**: The test results of the symmetric battery show that C4ViIm is the most unstable among the three electrolytes (Fig. 3d), with a rapid capacity decay. In order to explain the capacity decay, we detected the structure of the C4ViIm electrolyte after cycling through 1H NMR spectroscopy, and the results showed the presence of N-(4-(1-methyl-imidazolium)butyl)-4,4'-dipyrydyl chloride (Supplementary Figure 30) and 1-(2-Chlorobutyl)-3-methylimidazolium chloride (Supplementary Figure 31) products, which indicates that C4ViIm has undergone decomposition.


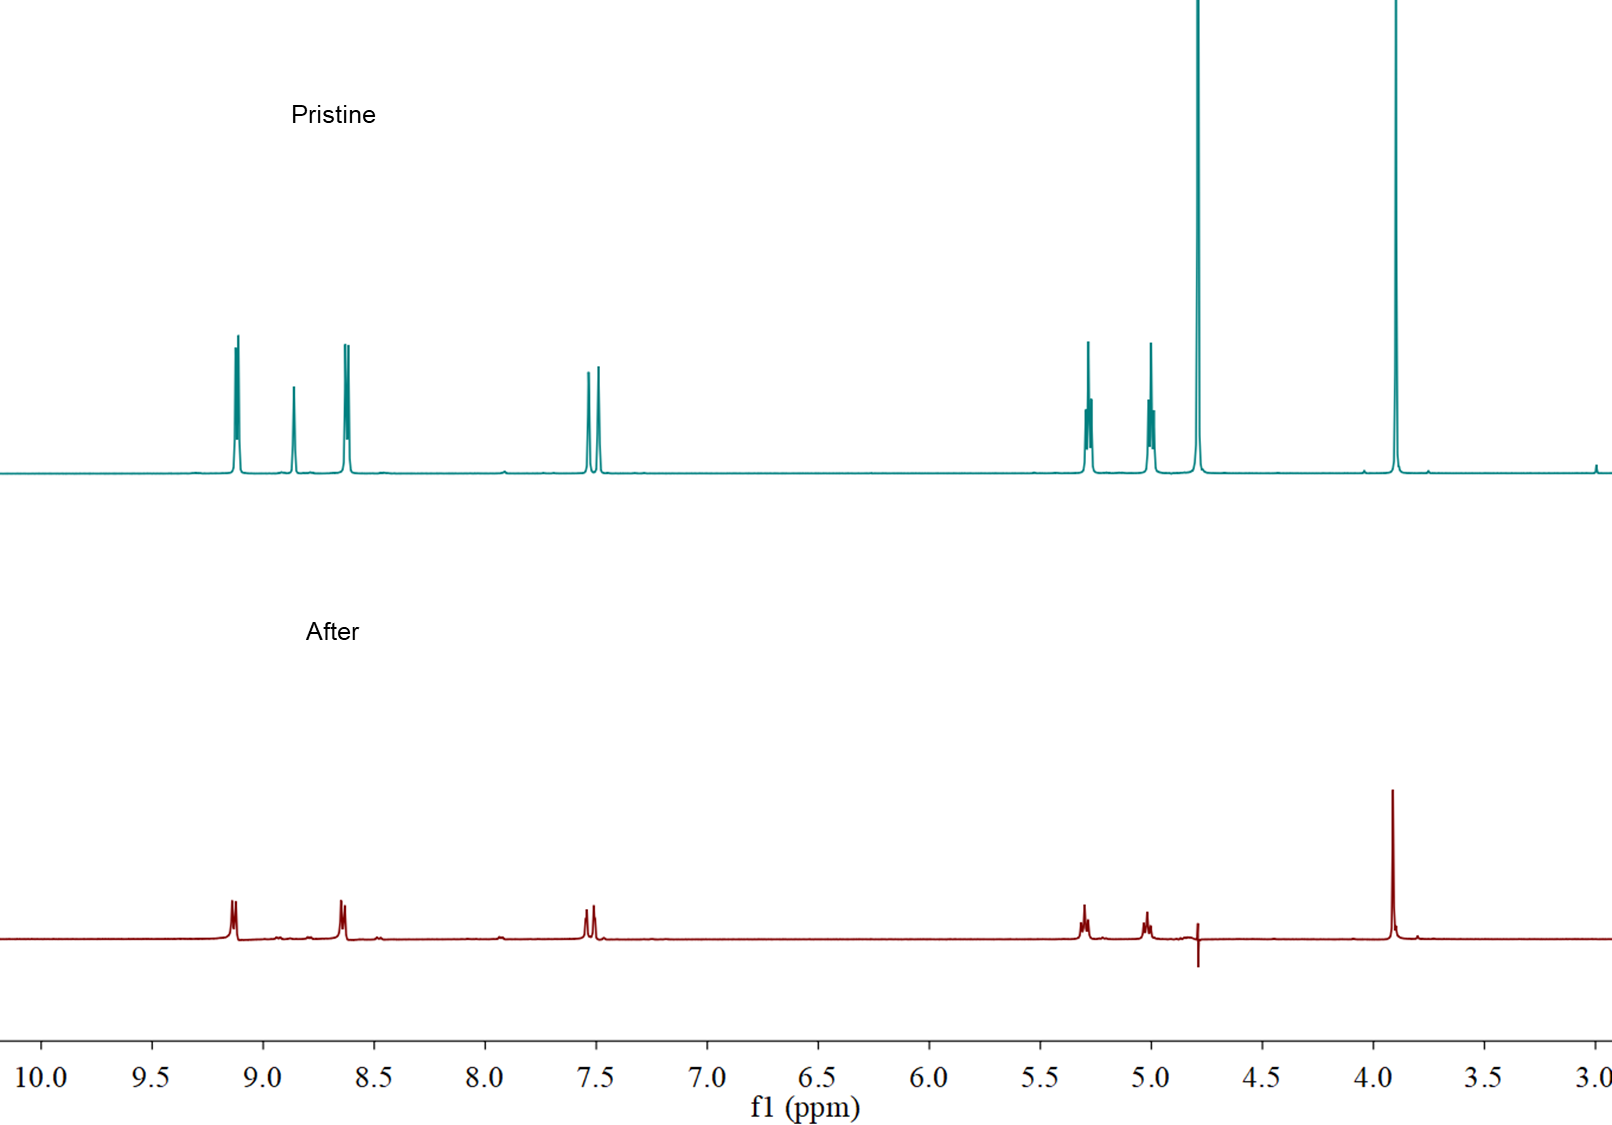


**Supplementary Figure 33**. 1H NMR (400MHz, D2O, 298 K) spectra comparison for symmetric C2ViIm anolyte AORFB after 680 cycles (0.1 M flow cell). The spectroscopy of C2ViIm after cycling was recorded in D2O with water suppression

**Notes**: The test results of the symmetric battery show that C2ViIm is the most stable among the three electrolytes (Fig. 3d). The spectral analyses reveal C2ViIm with trace structural degradation for 680 cycles, suggesting that donor-acceptor interactions enhance C2ViIm stability.


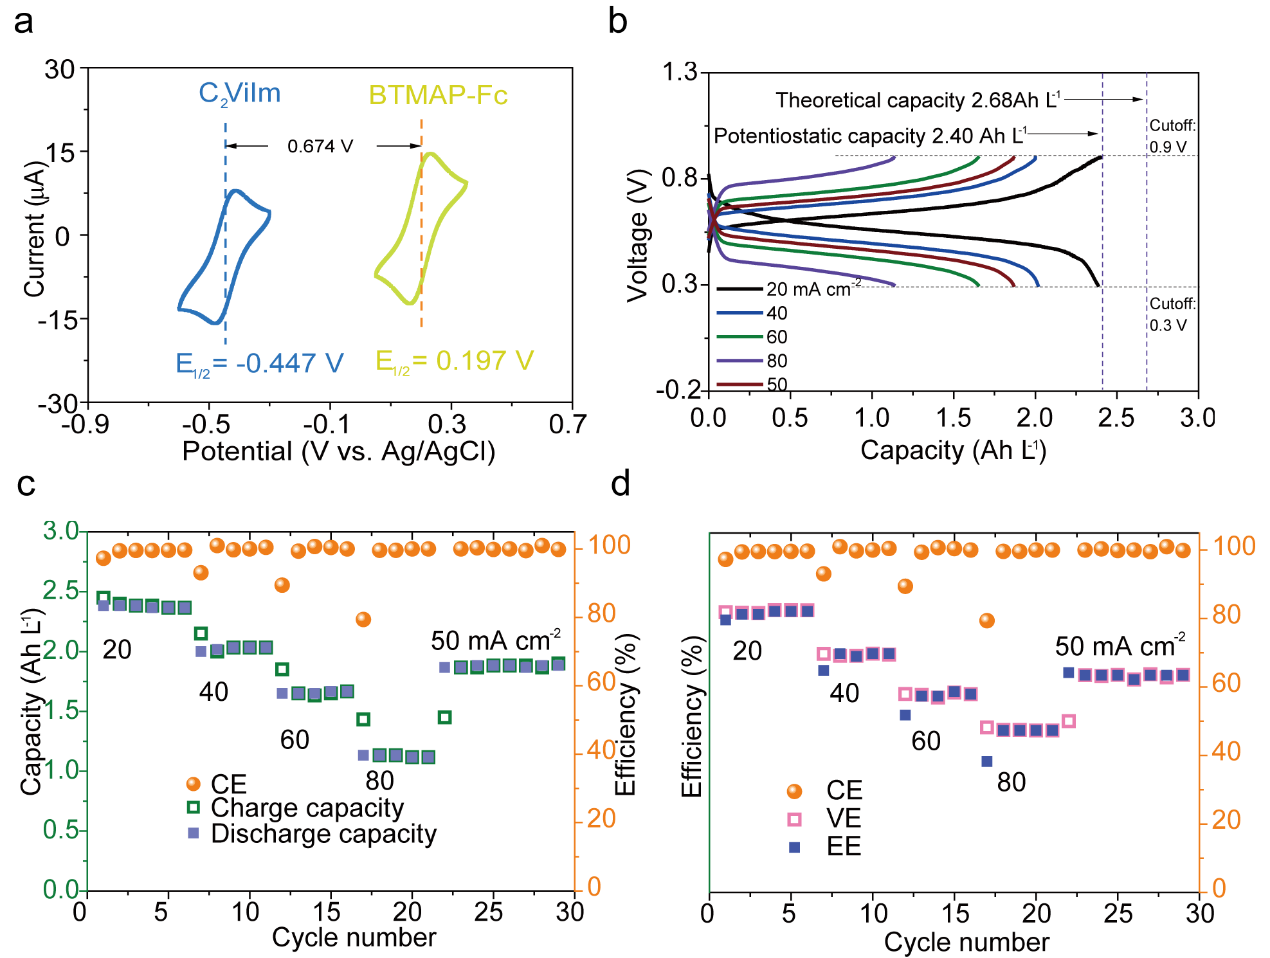


**Supplementary Figure 34**. (a) Cyclic voltammetry of C2ViIm and M BTMAP-Fc in a 0.5 M NaCl aqueous solution (scan rate, 100 mV s−1). (b) Ratability test of the flow battery with 0.1 M C2ViIm (6 mL) anolyte and 0.1 M BTMAP-Fc (12 mL) catholyte (supporting electrolyte, 2 M NaCl). (c) Discharge capacity, charge capacity, coulombic efficiency, (d) voltage efficiency and energy efficiency under different current densities.

**Notes**: The BTMAP-Fc/C2ViIm AORFB (Supplementary Figure 32a) reaches a cell voltage of 0.674 V, the cell was cycled at constant current densities from 20 to 80 mA cm−2 with excellent retention of cell performance (Supplementary Figure 32b-d). The capacity utilization of 0.1 M C2ViIm AORFB was around 89.6%, 75.4%, 69.8%, 61.9%, and 42.5% at 20, 40, 50, 60, and 80 mA cm−2, respectively. The energy efficiency (EE) decreased from around 82.1% to 47.3% as the current density increased from 20 to 80 mA cm−2 with the coulombic efficiency (CE) of nearly 99.9%.


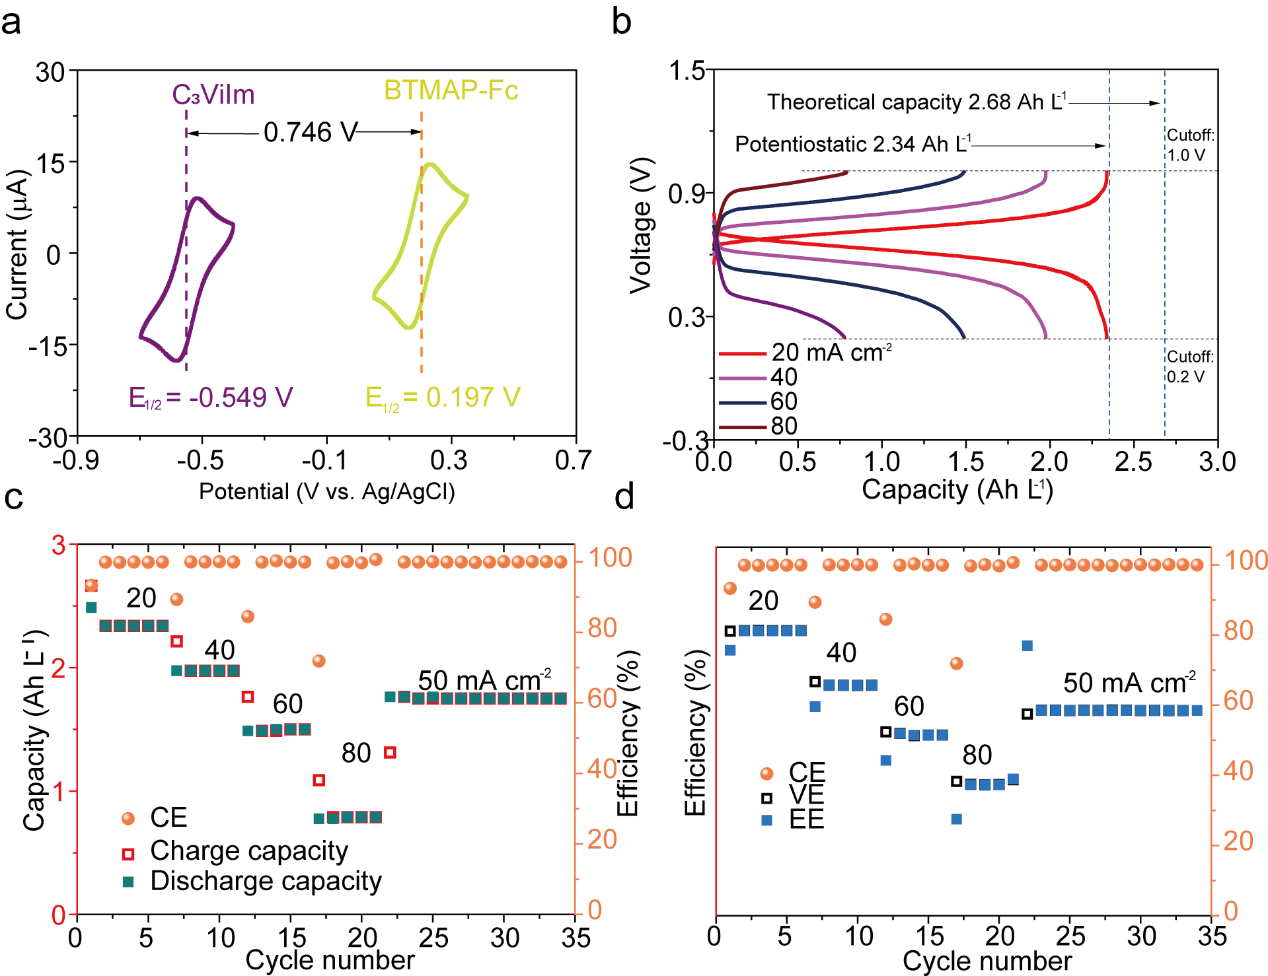


**Supplementary Figure 35**. (a) Cyclic voltammetry of C3ViIm and M BTMAP-Fc in a 0.5 M NaCl aqueous solution (scan rate, 100 mV s−1). (b) Ratability test of the flow battery with 0.1 M C3ViIm (8 mL) anolyte and 0.1 M BTMAP-Fc (14 mL) catholyte (supporting electrolyte, 2 M NaCl). (c) Discharge capacity, charge capacity, coulombic efficiency, (d) voltage efficiency and energy efficiency under different current densities.

**Notes**: The BTMAP-Fc/C3ViIm AORFB (Supplementary Figure 33a) reaches a cell voltage of 0.746 V. The capacity utilization of 0.1 M C3ViIm AORFB was around 87.3%, 73.7%, 56.0%, and 29.4% at 20, 40, 60, and 80 mA cm−2, respectively. The energy efficiency (EE) decreased from around 81.2% to 37.3% as the current density increased from 80 to 20 mA cm−2 with the coulombic efficiency (CE) of nearly 99.9%.


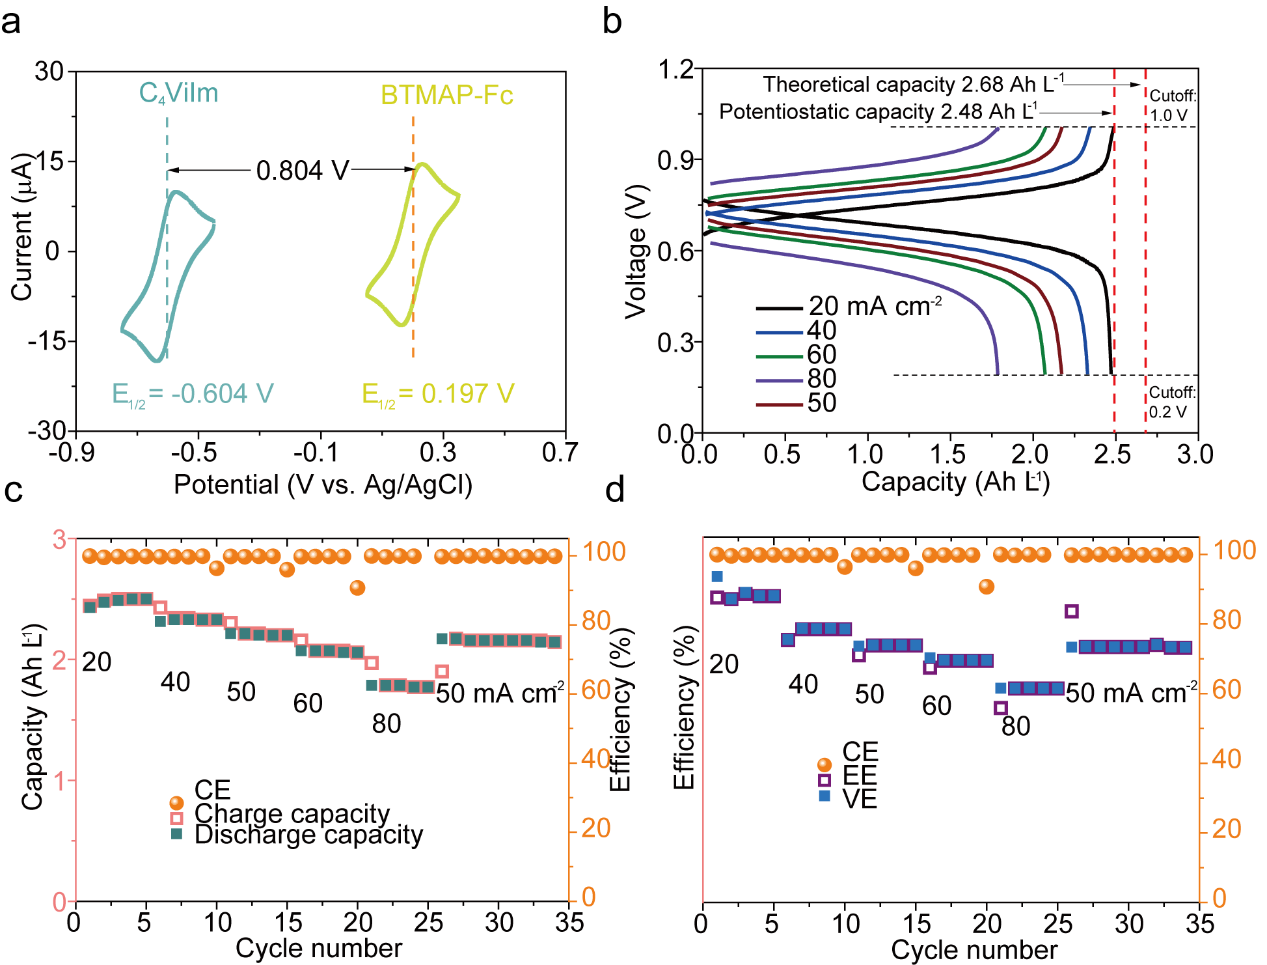


**Supplementary Figure 36**. (a) Cyclic voltammetry of C4ViIm and M BTMAP-Fc in a 0.5 M NaCl aqueous solution (scan rate,100 mV s-1). (b) Ratability test of the flow battery with 0.1 M C4ViIm (7 mL) anolyte and 0.1 M BTMAP-Fc (14 mL) catholyte (supporting electrolyte, 2 M NaCl). (c) Discharge capacity, charge capacity, coulombic efficiency, (d) voltage efficiency and energy efficiency under different current densities.

**Notes**: The BTMAP-Fc/C4ViIm AORFB (Supplementary Figure 34a) reaches a cell voltage of 0.804 V. The capacity utilization of 0.1 M C4ViIm AORFB was around 92.5%, 86.8%, 82.1%, 77.3%, and 66.1% at 20, 40, 50, 60, and 80 mA cm−2, respectively. The energy efficiency (EE) decreased from around 87.9% to 61.4% as the current density increased from 20 to 80 mA cm−2 with the coulombic efficiency (CE) of nearly 99.9%.


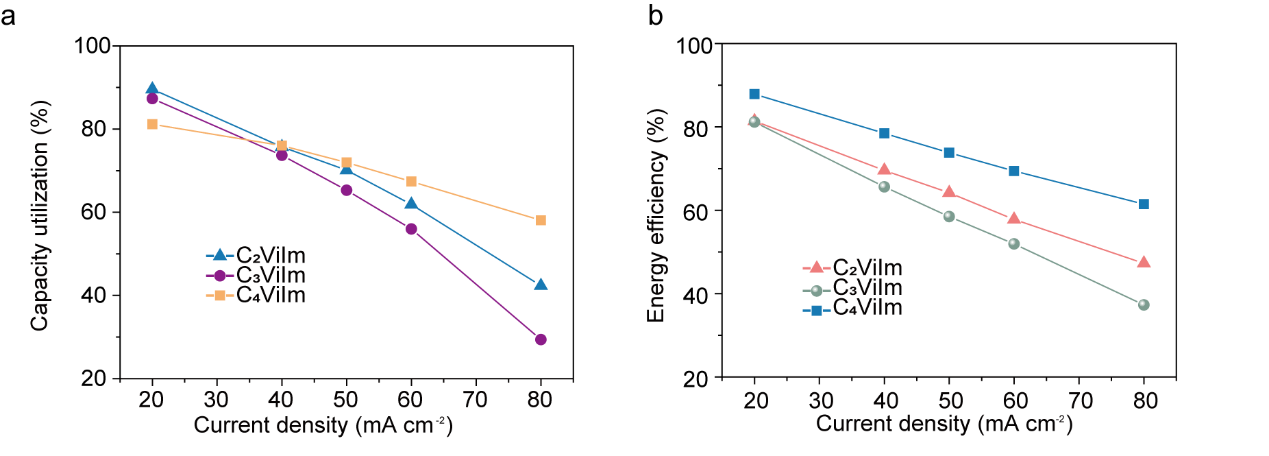


**Supplementary Figure 37**. Ratability test of the flow battery with 0.1 M CnViIm (n=2,3,4) anolyte and 0.1 M BTMAP-Fc catholyte (supporting electrolyte, 2 M NaCl). Capacity utilization (a) and energy efficiency (b) under different current densities.


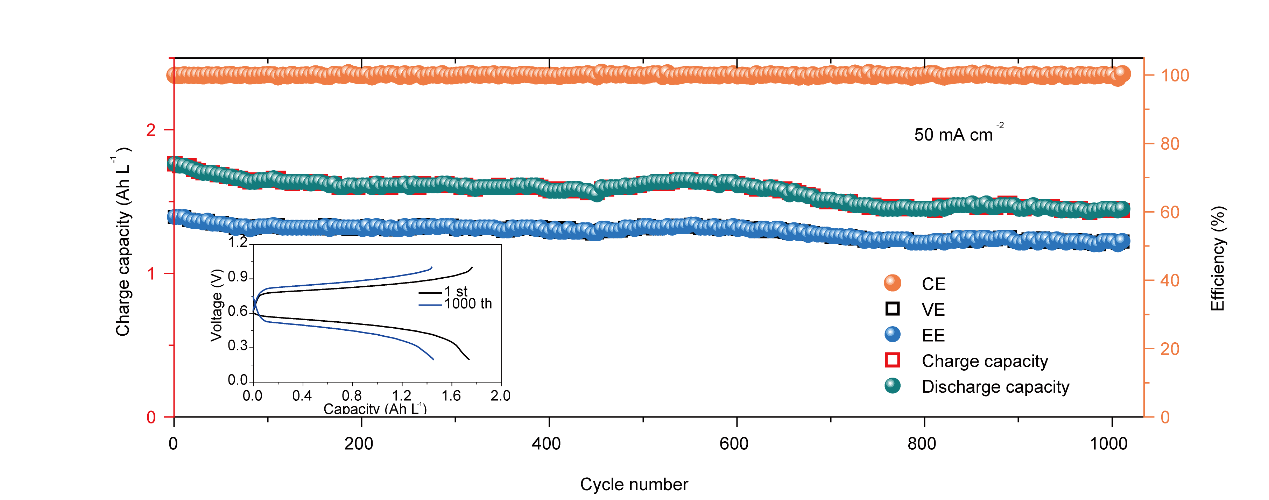


**Supplementary Figure 38**. Extended 1012 cycle testing performance of the BTMAP-Fc/C3ViIm AORFB in the voltage range of 1.0-0.2 V at current density 50 mA cm−2. The cell was constructed with 8 mL of a 0.1 M C3ViIm anolyte and 14 mL of a 0.1 M BTMAP-Fc catholyte (supporting electrolyte, 2 M NaCl). (inset: charge/discharge profiles of the BTMAP-Fc/C3ViIm AORFB at different cycles).

**Notes**: C3ViIm reached a capacity retention of 82.3% after 1012 cycles, corresponding to a capacity fade rate of 0.018% per cycle. The energy and voltage efficiencies through the cycles remained around 54.2%, with an average coulombic efficiency of 99.9%.


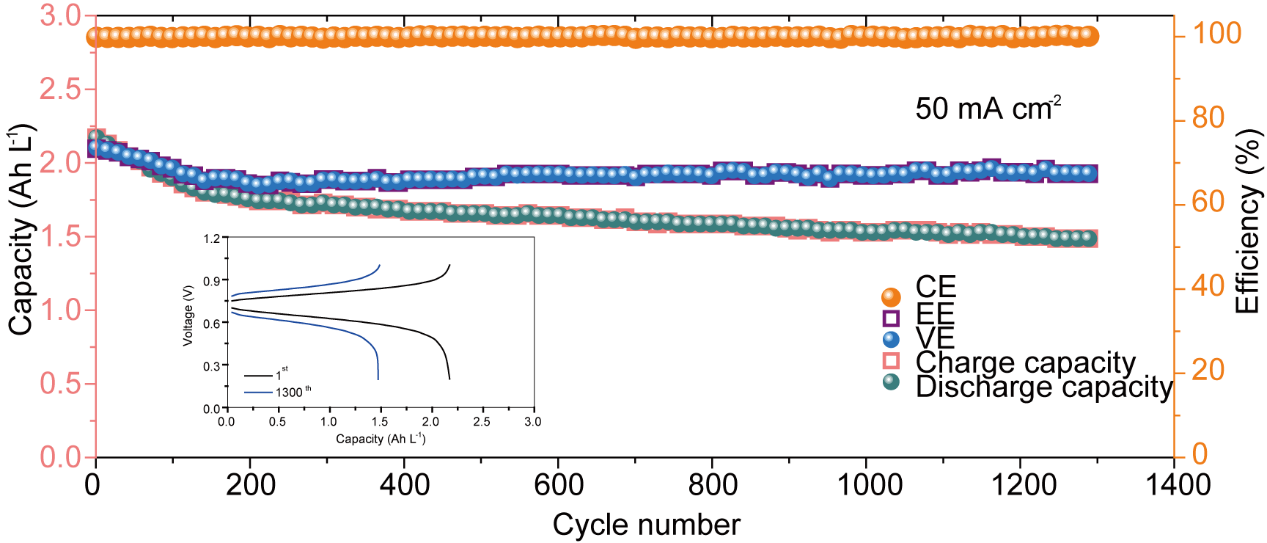


**Supplementary Figure 39**. Extended 1300 cycle testing performance of the BTMAP-Fc/C4ViIm AORFB in the voltage range of 1.1-0.2 V at current density 50 mA cm−2. The cell was constructed with 7 mL of a 0.1 M C4ViIm anolyte and 14 mL of a 0.1 M BTMAP-Fc catholyte (supporting electrolyte, 2 M NaCl). (inset: charge/discharge profiles of the BTMAP-Fc/C4ViIm AORFB at different cycles).

**Notes**: The 0.1 M C4ViIm AORFB was cycled at 50 mA cm−2 between 0.2 and 1.1 V for 1300 cycles, corresponding to a capacity fade rate of 0.024% per cycle. The energy and voltage efficiencies through the cycles remained around 67.25%, with an average coulombic efficiency of 99.9%. Their (C2ViIm, C3ViIm and C4ViIm) similar capacity fade rates agree with their similar strength of donor-acceptor interactions.


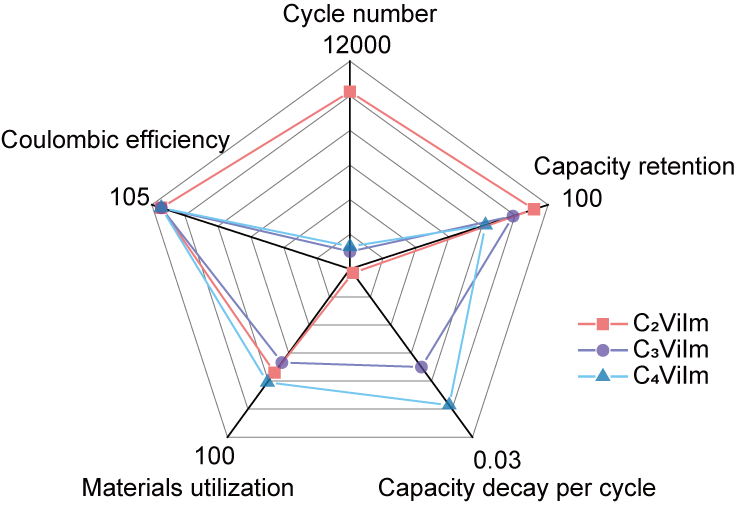


**Supplementary Figure 40**. Radar plot with five requirements for AORFBs (CE, cycling number, capacity retention, capacity decay per cycle, material utilization) to evaluate CnViIm (n=2,3,4) electrolytes.


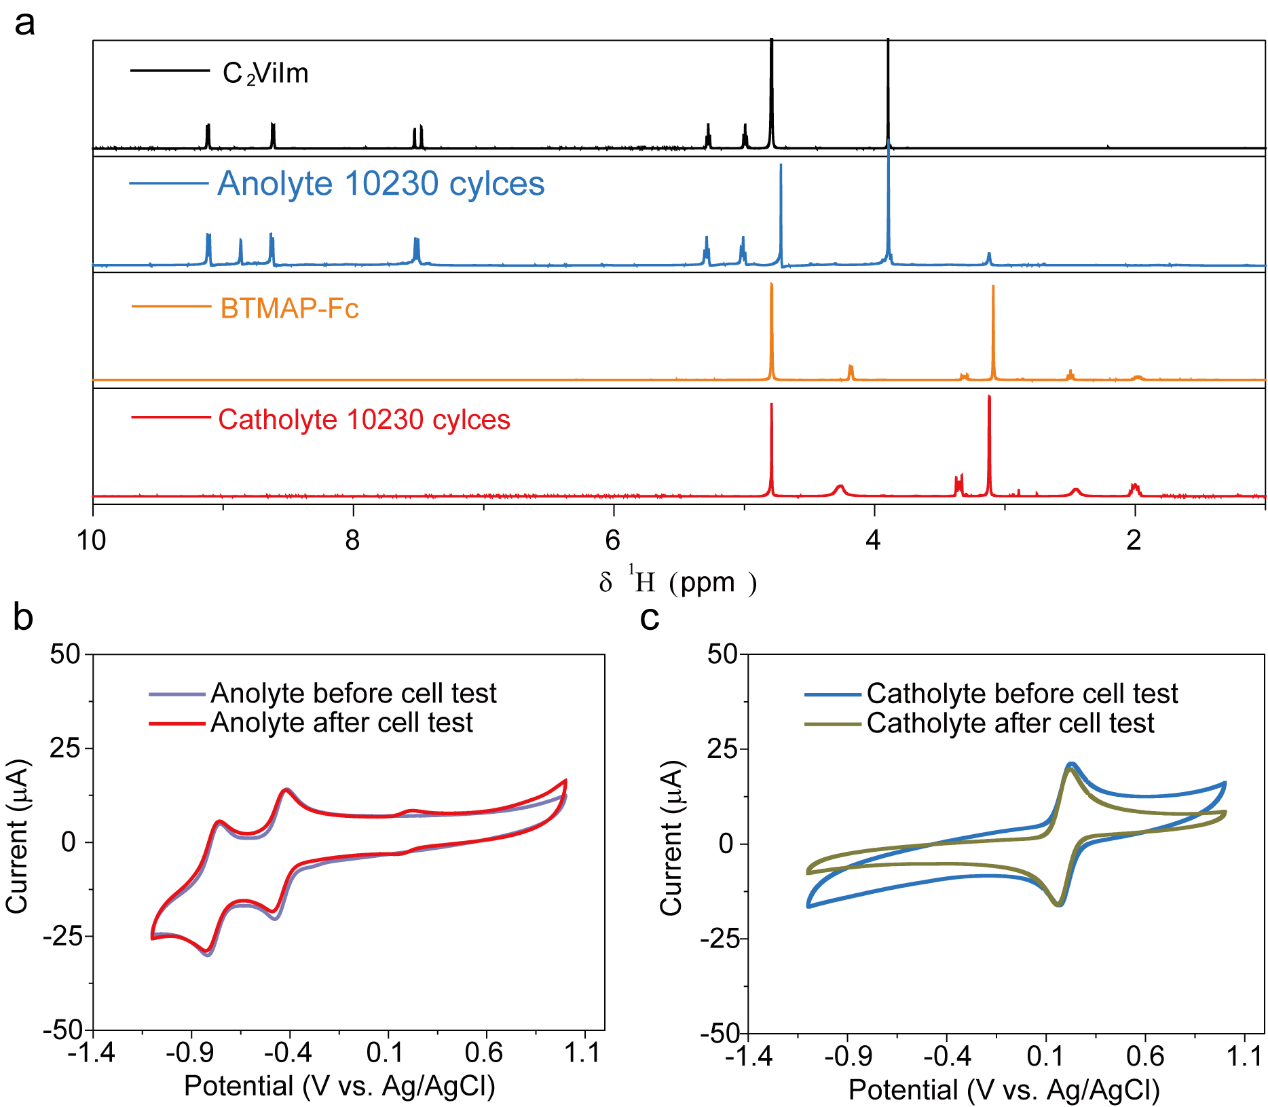


**Supplementary Figure 41**. Characterization of electrolytes for 0.1 M BTMAP-Fc/C2ViIm AORFB after cycling. (a) 1H NMR spectra comparison for BTMAP-Fc, C2ViIm, the catholyte and the anolyte after 10230 cycles. Cyclic voltammograms of the anolyte (b) and the catholyte (c) before and after 10230 cycles. The cell structure was 6 ml of a 0.1 M C2ViIm anolyte and 10 ml of a 0.1 M BTMAP-Fc catholyte (supporting electrolyte, 2 M NaCl).

**Notes**: The 1H NMR spectrum shows that after 10230 cycles of BTMAP-Fc/C2ViIm flow cell, a new peak appears (3.1 ppm) at the anolyte, which is attributed to the membrane penetration of the BTMAP-Fc. In addition, there are no other new peak signals, indicating that the anolyte structure is stable. The capacity degradation of C2ViIm with stronger donor-acceptor interactions flow cell was mainly attributed to the transmembrane crossover of BTMAP-Fc, while the capacity decay of C3ViIm and C4ViIm with weaker donor-acceptor interactions was primarily attributed to their own chemical degradation and transmembrane crossover of BTMAP-Fc, as confirmed by 1H NMR, CV, and HRMS studies.


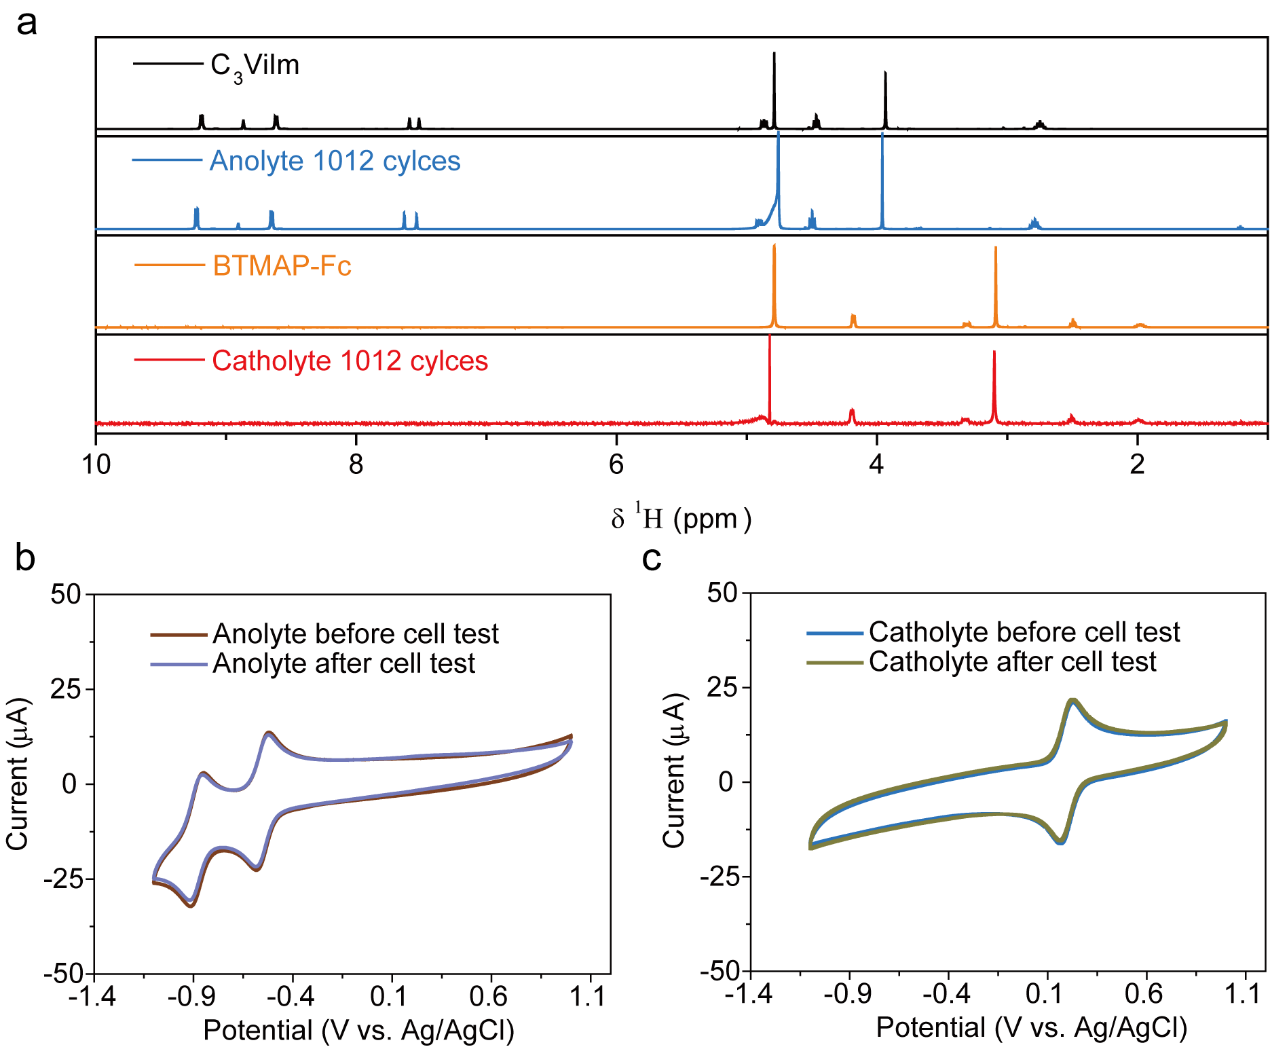


**Supplementary Figure 42**. Characterization of electrolytes 0.1 M BTMAP-Fc/C3ViIm AORFB after cycling. (a) 1H NMR spectra comparison for BTMAP-Fc, C3ViIm, the catholyte and the anolyte after 1012 cycles. Cyclic voltammograms of the anolyte (b) and the catholyte (c) before and after 1012 cycles. The cell structure was 8 ml of a 0.1 M C3ViIm anolyte and 12 ml of a 0.1 M BTMAP-Fc catholyte (supporting electrolyte, 2 M NaCl).

**Notes**: The 1H NMR spectrum shows that after 1012 cycles of the BTMAP-Fc/C3ViIm flow cell, no new signal peak appears at the anolyte electrode, and the electrochemical cyclic voltammetry curve does not show any new signal peak. However, HR-MS reveal that the C3ViIm/BTMAP-Fc flow battery experience degradation of the anolyte and crossover of the catholyte (Supplementary Figure 44). This may not have reached the detection limit of 1H NMR and CV.


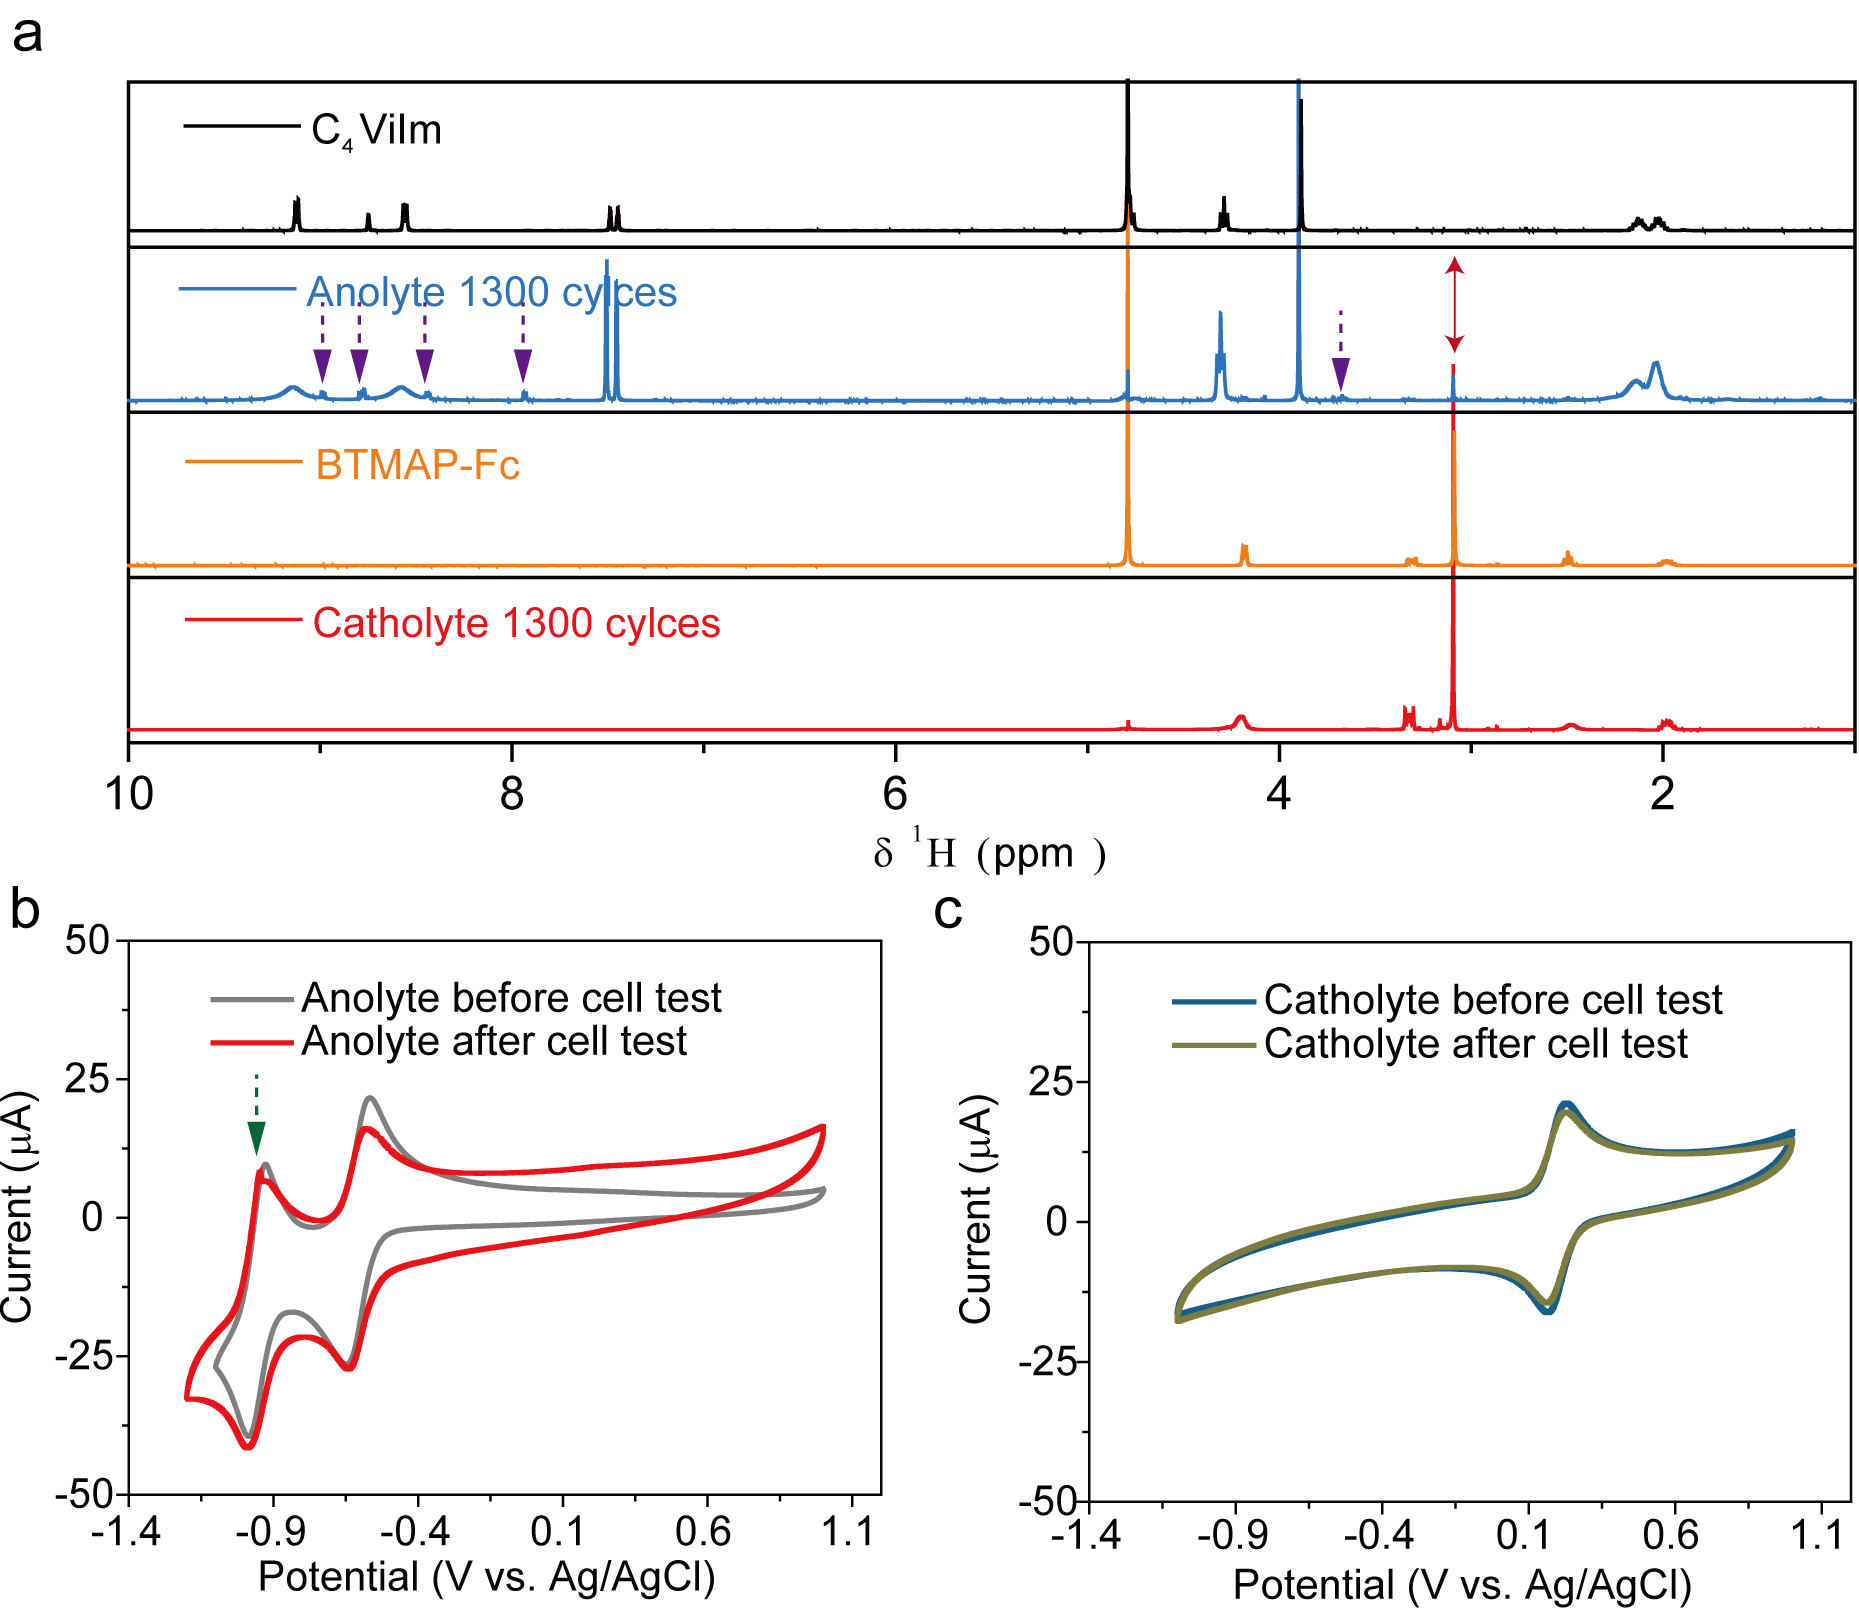


**Supplementary Figure 43**. Characterization of electrolytes 0.1 M BTMAP-Fc/C4ViIm AORFB after cycling. (a) 1H NMR spectra comparison for BTMAP-Fc, C4ViIm, the catholyte and the anolyte after 1300 cycles. Cyclic voltammograms of the anolyte (b) and the catholyte (c) before and after 1300 cycles. The cell structure was 7 ml of a 0.1 M C4ViIm anolyte and 12 ml of a 0.1 M BTMAP-Fc catholyte (supporting electrolyte, 2 M NaCl).

**Notes**: The 1H NMR spectrum shows that a series of new signal peaks (8.9, 8.7, 8.4, 7.9, and 3.1 ppm) appear at the negative electrode of the BTMAP-Fc/C4ViIm flow cell after 1300 cycles, which belong to compound N-(4-(1-methyl-imidazolium)butyl)-4,4'-dipyrydyl chloride (purple arrow) and BTMAP-Fc (red arrow). These results are consistent with the product analysis of the symmetric cell (Supplementary Figure 30 and 31). CV shows a new more negative signal peak (green arrow) compared to C4ViIm, which is probably the N-(4-(1-methyl-imidazolium)butyl)-4,4'-dipyrydyl chloride signal of the decomposition product. These degradation products were further confirmed by HRMS (Supplementary Figure 42).


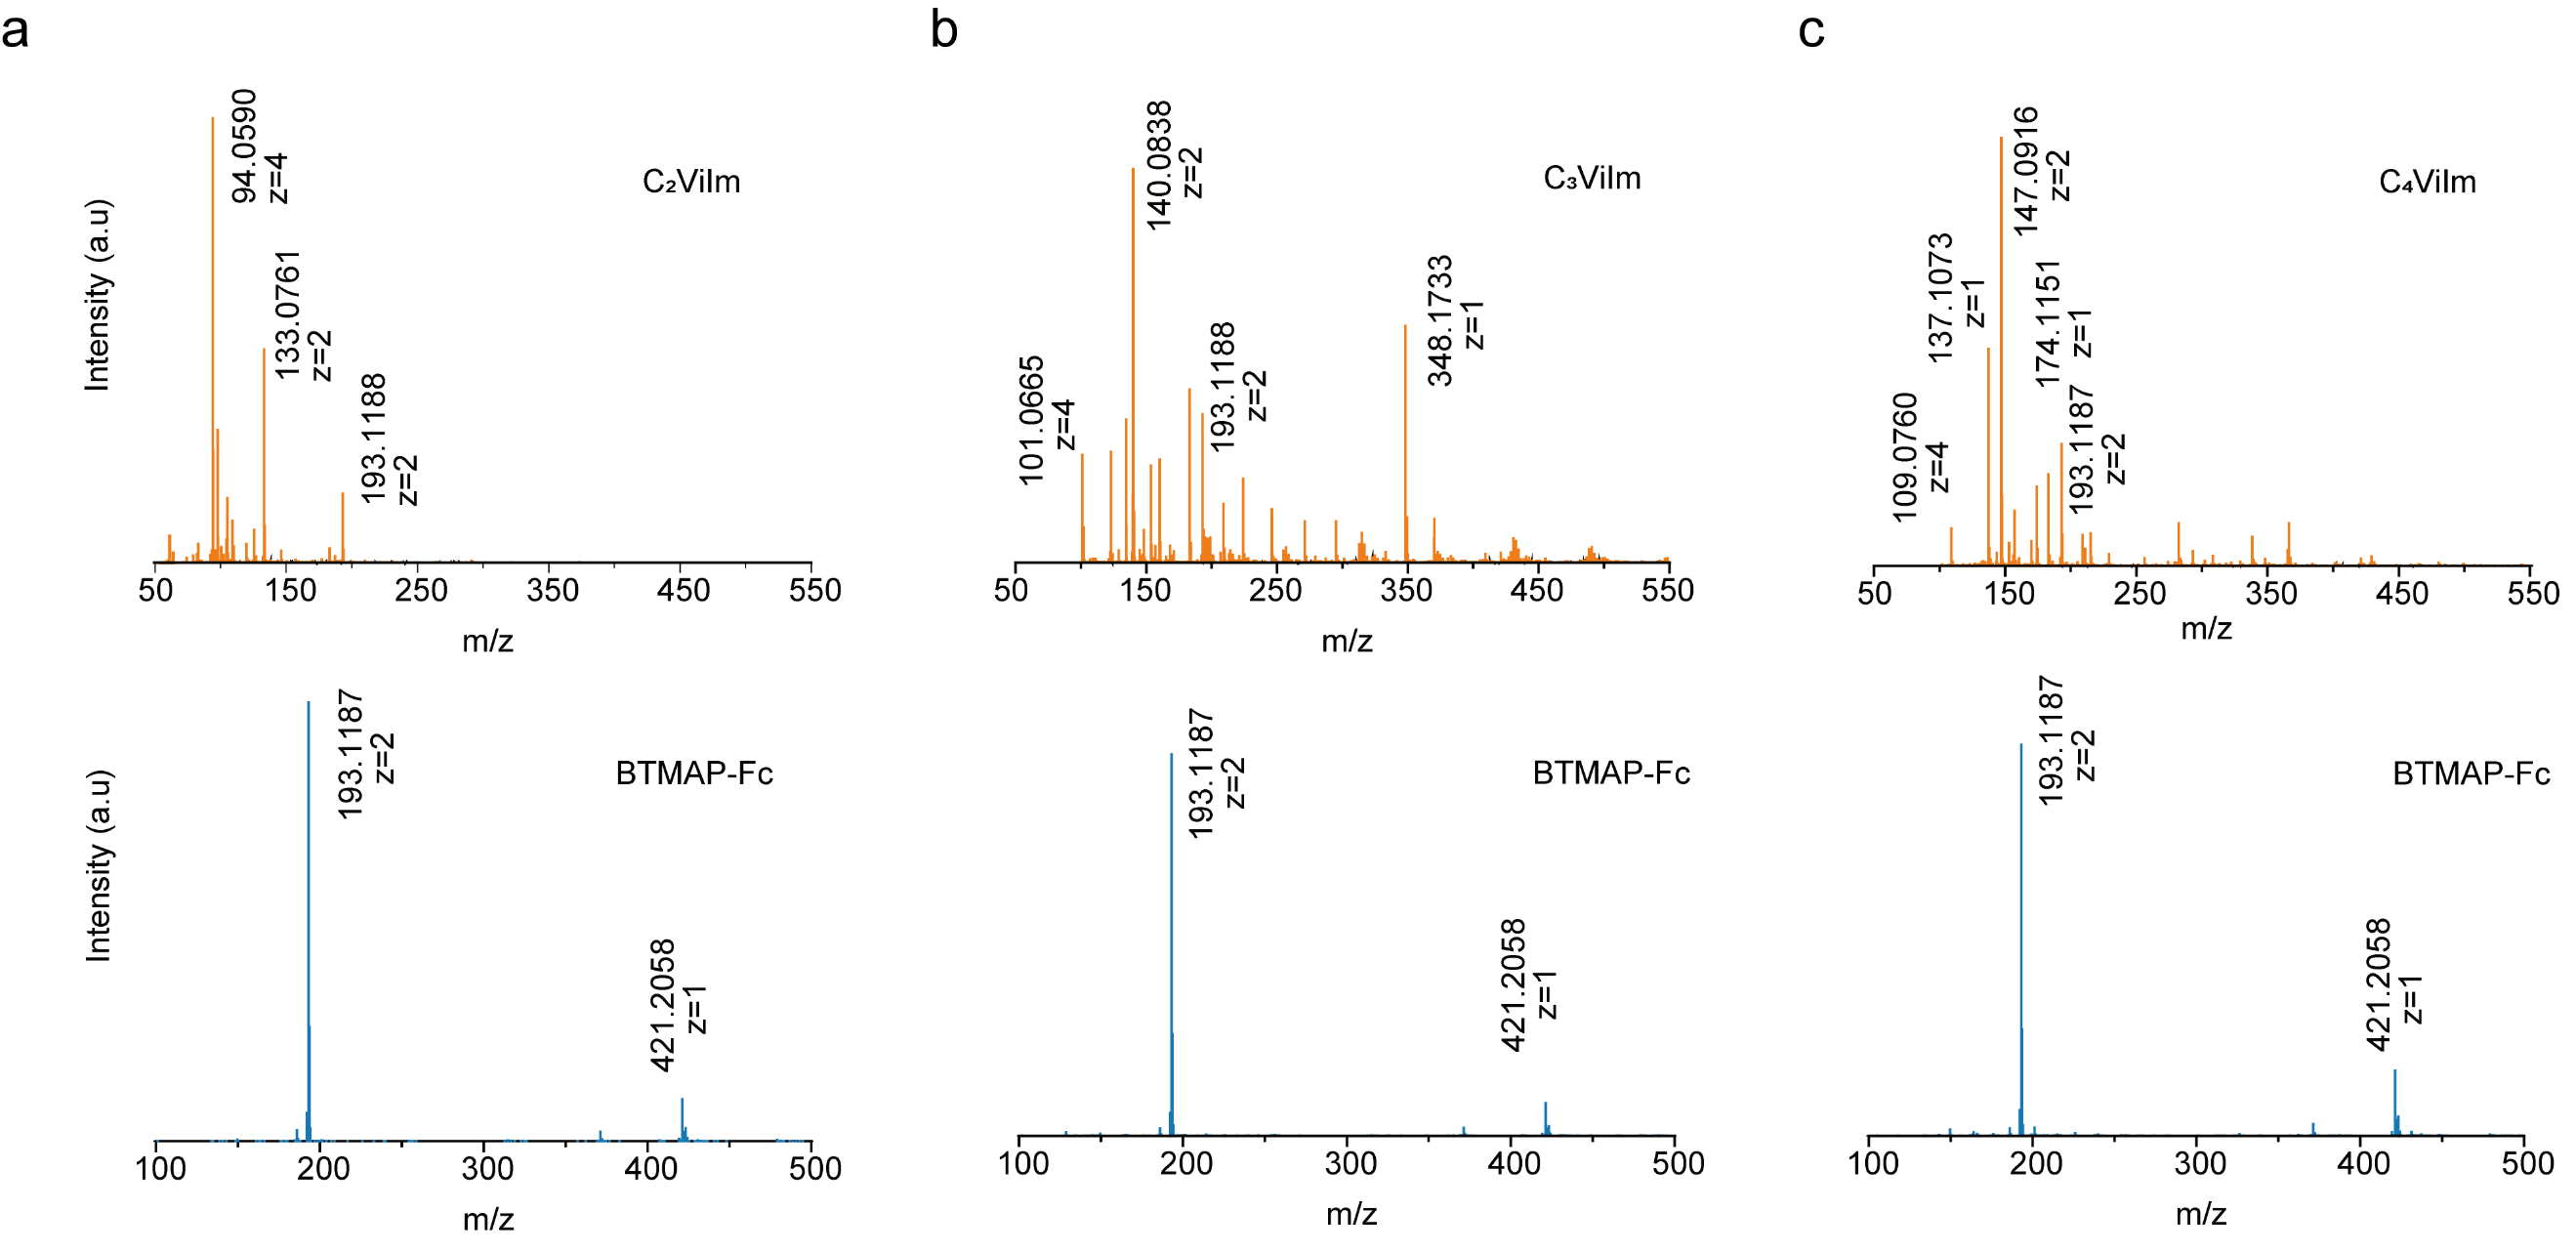


**Supplementary Figure 44**. The HR-MS spectra of the samples after cycling for AORFBs in 0.1 M. (**a**) BTMAP-Fc/C2ViIm flow cell. (**b**) BTMAP-Fc/C3ViIm flow cell. (**c**) BTMAP-Fc/C4ViIm flow cell.

**Notes:** Several *m*/*z* peaks corresponding to the ion fragments from C3ViIm degradation was clearly observed (Supplementary Figure 44), attributed to N-(3-(1-methyl-imidazolium)propyl)-4,4'-dipyrydyl chloride ([M]2+ calcd for C17H20N42+ 140.0839, found  140.0838), indicating that weak donor-acceptor interactions make the N−C bond more polar, making it easier to break the N−C bond, thus causing battery capacity decay. The BTMAP-Fc catholyte crossover for C3ViIm/BTMAP-Fc flow cell after cycling was observed ([M]2+ calcd for C22H38FeN22+ 193.1184, found *m/z* = 193.1188) (Supplementary Figure 44b). For C4ViIm, NMR and CV results exhibit the presence of N-(4-(1-methyl-imidazolium)butyl)-4,4'-dipyrydyl chloride and trace amount of BTMAP-Fc (Fig. 5, and Supplementary Fig.44) in the anolyte, suggesting weaker donor-acceptor interactions significantly promoted the degradation of C4ViIm. The C4ViIm degradation is further experimentally confirmed by HRMS, which shows presence of N-(4-(1-methyl-imidazolium)butyl)-4,4'-dipyrydyl chloride ([M]2+ calcd for C18H22N42+ 147.0917, found 147.0916) and 1-(2-Chlorobutyl)-3-methylimidazolium chloride ([M+H] + calcd for C18H22N4+ 174.0841, found 174.1151) (Supplementary Figure 44c). The appearance of N-(4-(1-methyl-imidazolium)butyl)-4,4'-dipyrydyl chloride and 1-(2-Chlorobutyl)-3-methylimidazolium chloride should originate from instability of C4ViIm. We also observed crossover of BTMAP-Fc ([M]2+ calcd for C22H38FeN22+ 193.1184, found  193.1187) (Supplementary Figure 44c).


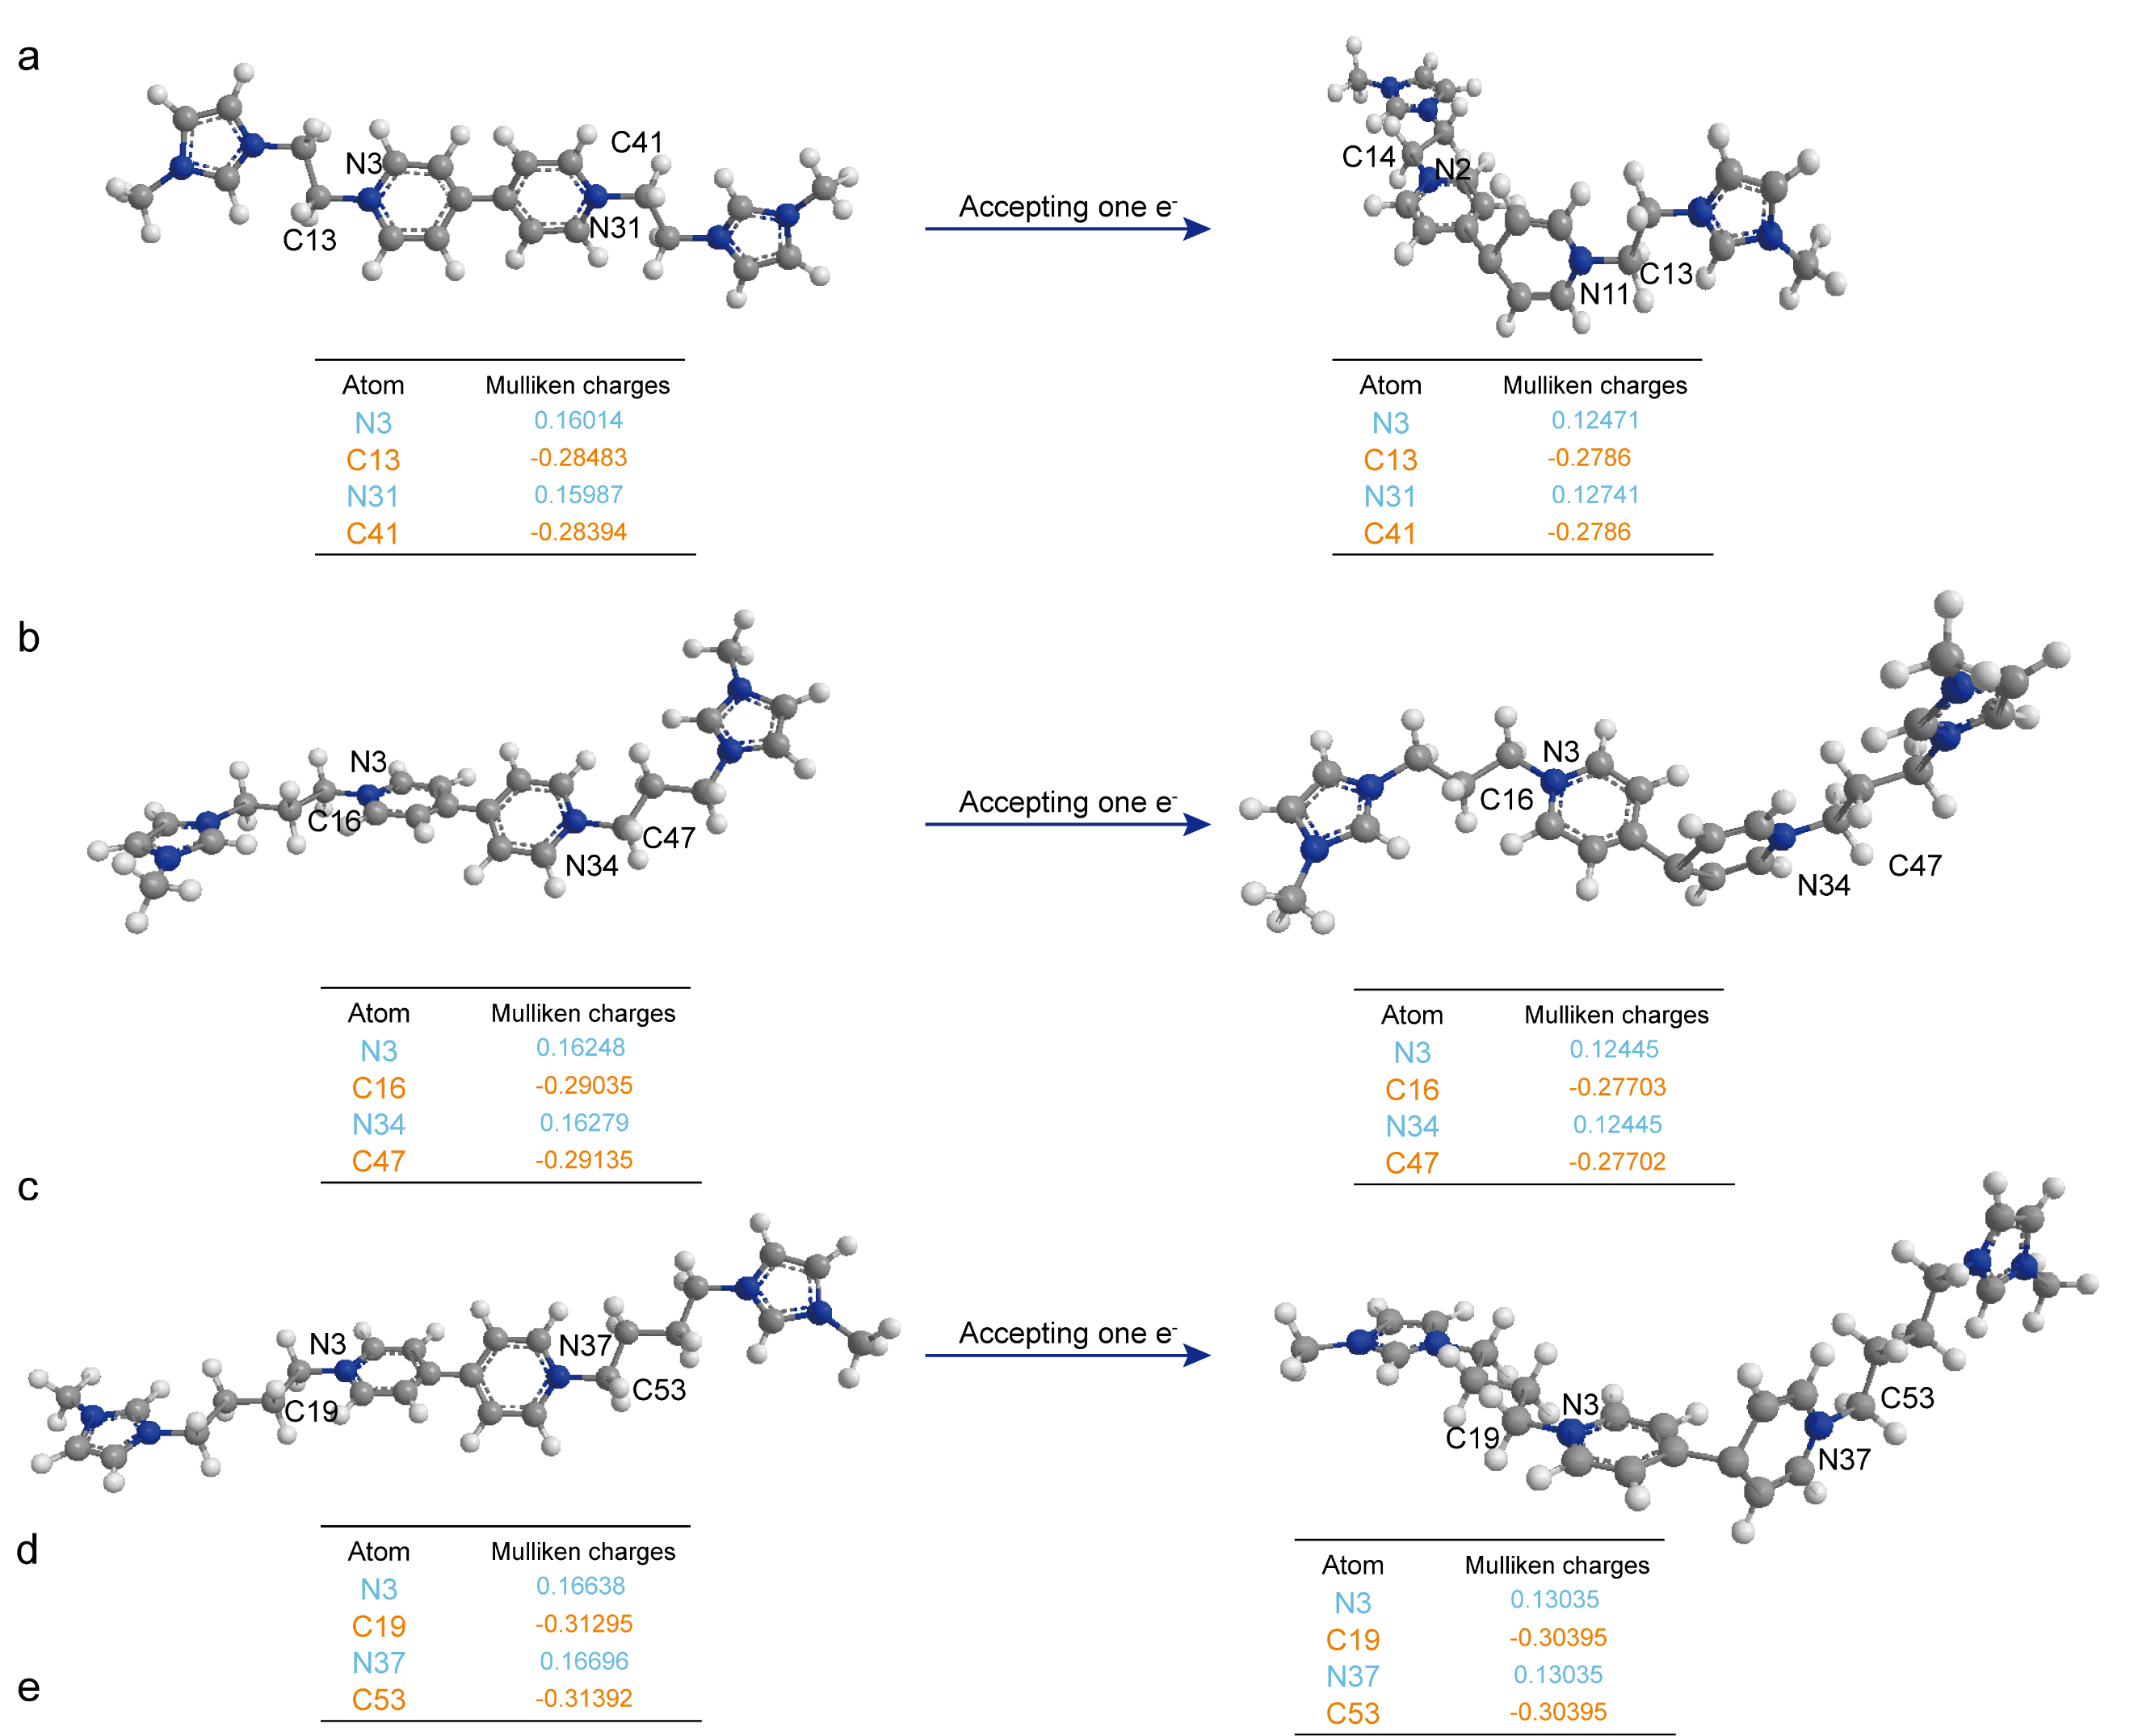


**Supplementary Figure 45**. Changes in the calculated Mulliken charges of important atoms in the during charge/discharge.

**Notes:** We conducted DFT calculations to analyze the possible mechanism of electrolytes degradation. As discussed in the main text (Fig. 5e), the strong polar bonds of electrolytes with the weak donor-acceptor interactions indicates preferable N−C bond breaking during charge/discharge thus generating charge. For electrolytes, we note that the carbon atoms of C4ViIm exhibit the most negative Mulliken charges, and when C4ViIm accept one electron (Supplementary Figure 45). This projects that the N−C bond of this carbon atom in C4ViIm is highly polar. For charge state, we find that accepting one electron leads to the most negative Mulliken charges on carbon atoms of C4ViIm in C2ViIm, C3ViIm and C4ViIm. These findings are consistent with ESP results (Fig 2e). Therefore, the negative charged C and positive charged N atoms are projected to break (Supplementary Figure 15).


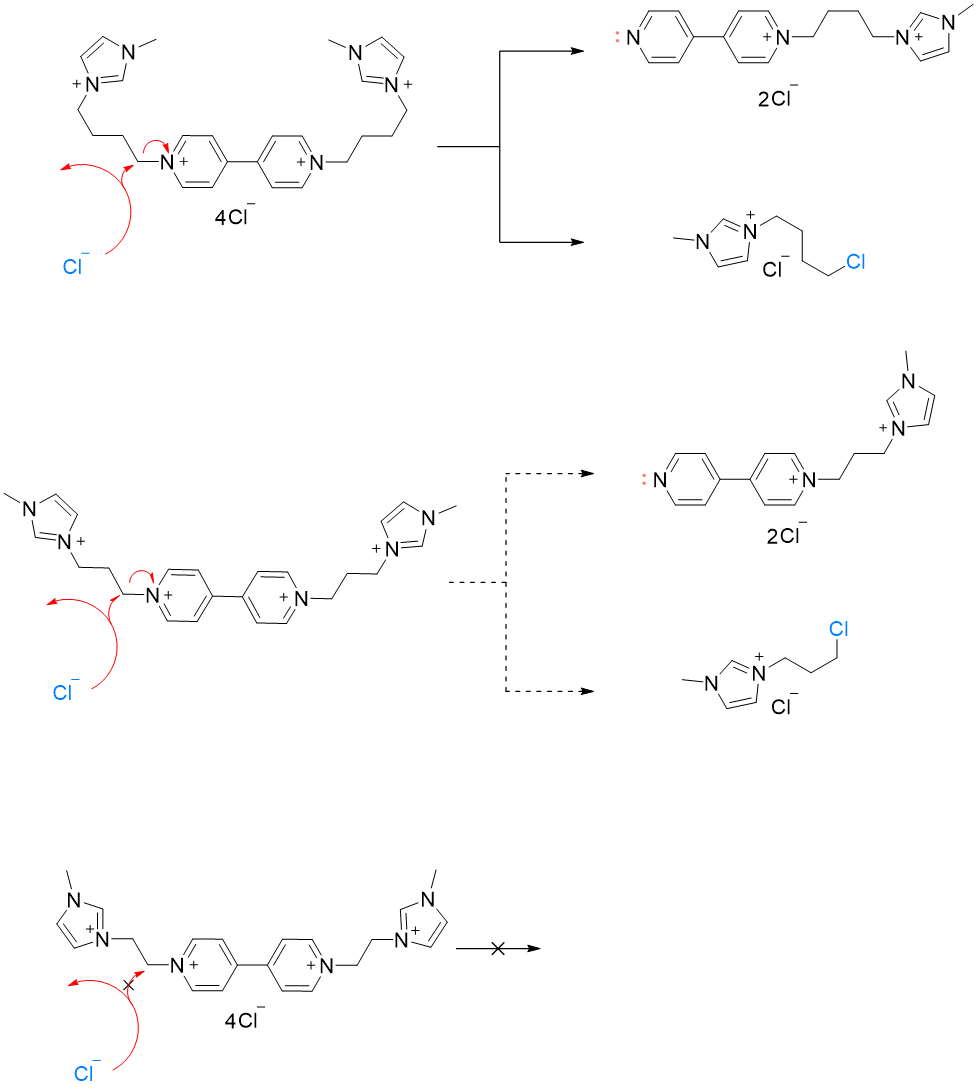


**Supplementary Figure 46**. Mechanisms of electrolyte degradation for C2ViIm, C3ViIm, and C4ViIm.

**Supplementary Figure 47**. The molecular structure showing the charged I (1-(2-Chlorobutyl)-3-methylimidazolium chloride) and its mesomeric form.


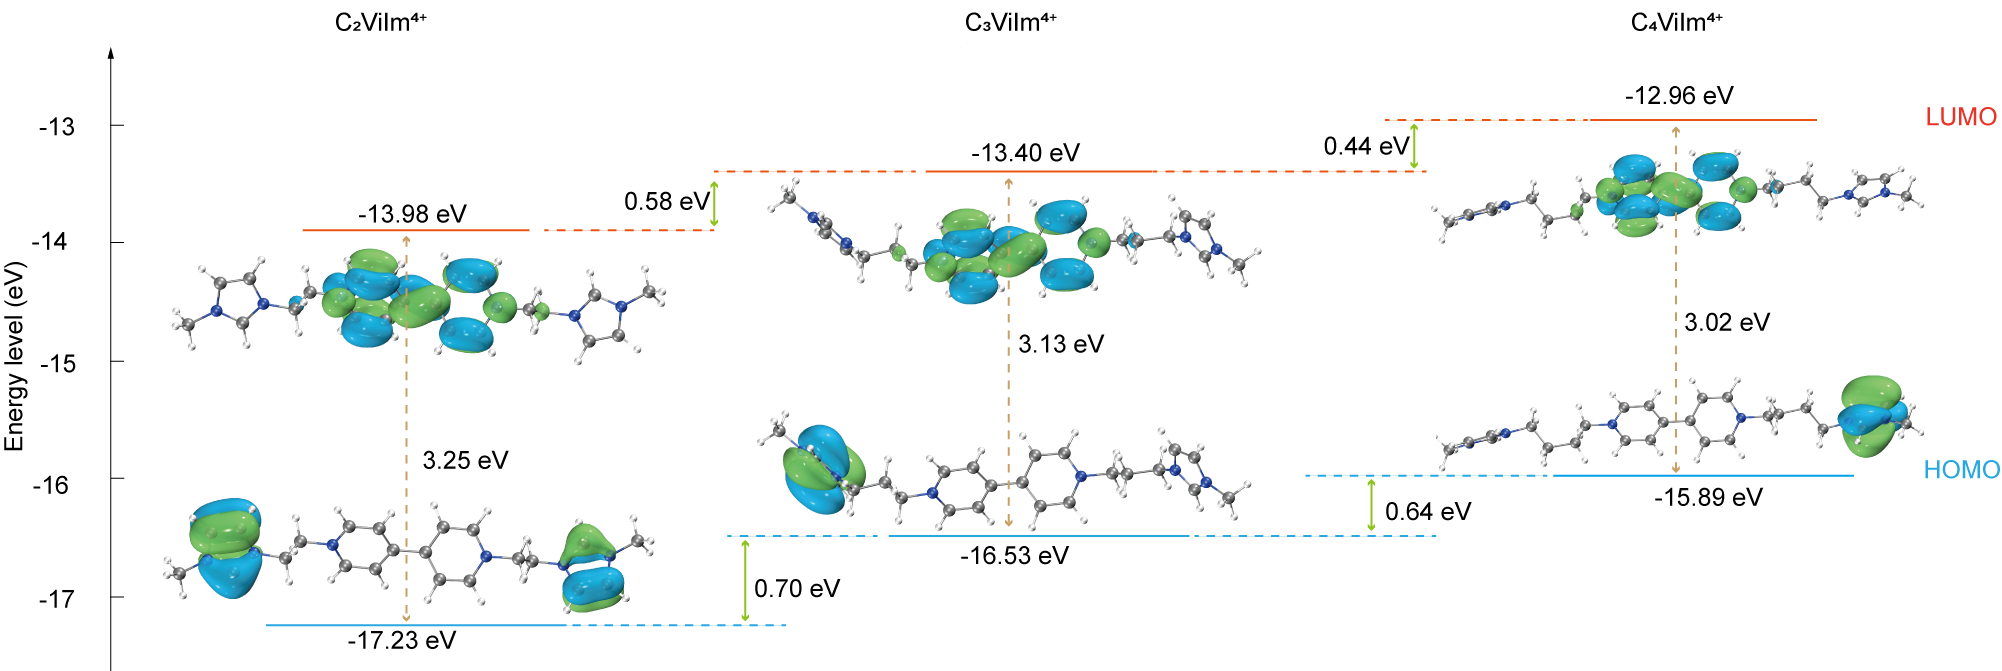


**Supplementary Figure 48**. LUMO and HOMO energy levels of different electrolytes including C2ViIm, C3ViIm and C4ViIm.

**Notes:** The energy levels of the lowest unoccupied molecular orbital (LUMO) and highest occupied molecular orbital (HOMO) of C2ViIm, C3ViIm and C4ViIm were calculated using DFT. The HOMO diagram shows that C2ViIm is lower than C3ViIm and C4ViIm due to effective electron delocalization and conjugation, indicating that its oxidation state is more chemically stable. The LUMO-HOMO gaps of C3ViIm and C4ViIm are smaller than that of C2ViIm, which further indicates that C2ViIm is more chemically stable.


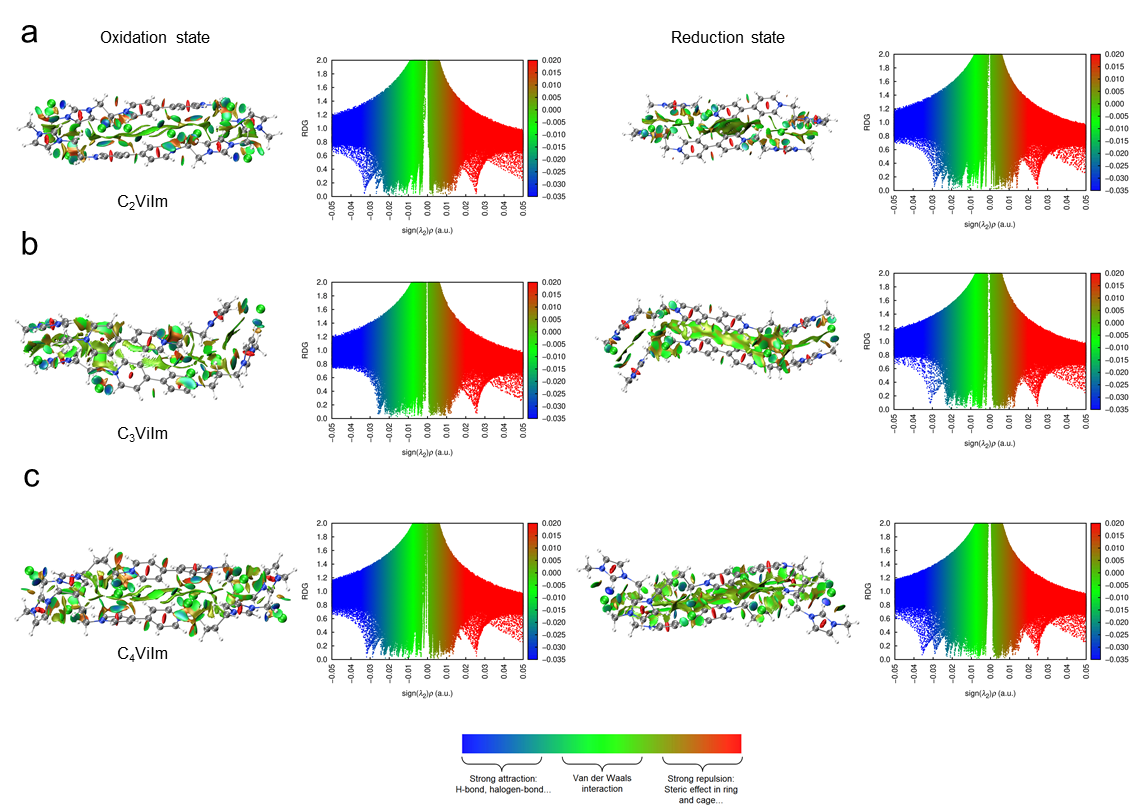


**Supplementary Figure 49**. NCI 3D isosurfaces and 2D-RDG scattered map of compound C2ViIm (a), C3ViIm (b), and C4ViIm (c) in the density functional theory (DFT)18.

Notes: The electron density of sign (*λ2*) relative to RDG indicates the nature and magnitude of intermolecular inter actions. In molecular systems, blue signifies repulsion, whereas red represents repulsive forces. Sign (*λ2*) is an important factor in predicting the type of interaction. For example, sign 2 < 0 implies repulsive forces between bonded atoms, while sign (*λ2*) > 0 suggests non-bonded atoms without repulsive force. The RDG scatter plot for the complexes is presented on the right side of Supplementary Figure 49. According to the expression at the top of the figure, red indicates strong repulsive forces (steric or cyclic effect); blue represents hydrogen bonding; and green reflects the presence of Van der Waals interactions. According to color classification, there is a Vander Waals interaction between the CnViIm molecule, which suggests that these molecules have weak interactions. These results are similar to previous reports that a relatively high surface potential due to the positively charged side groups, which hinders their aggregation19.


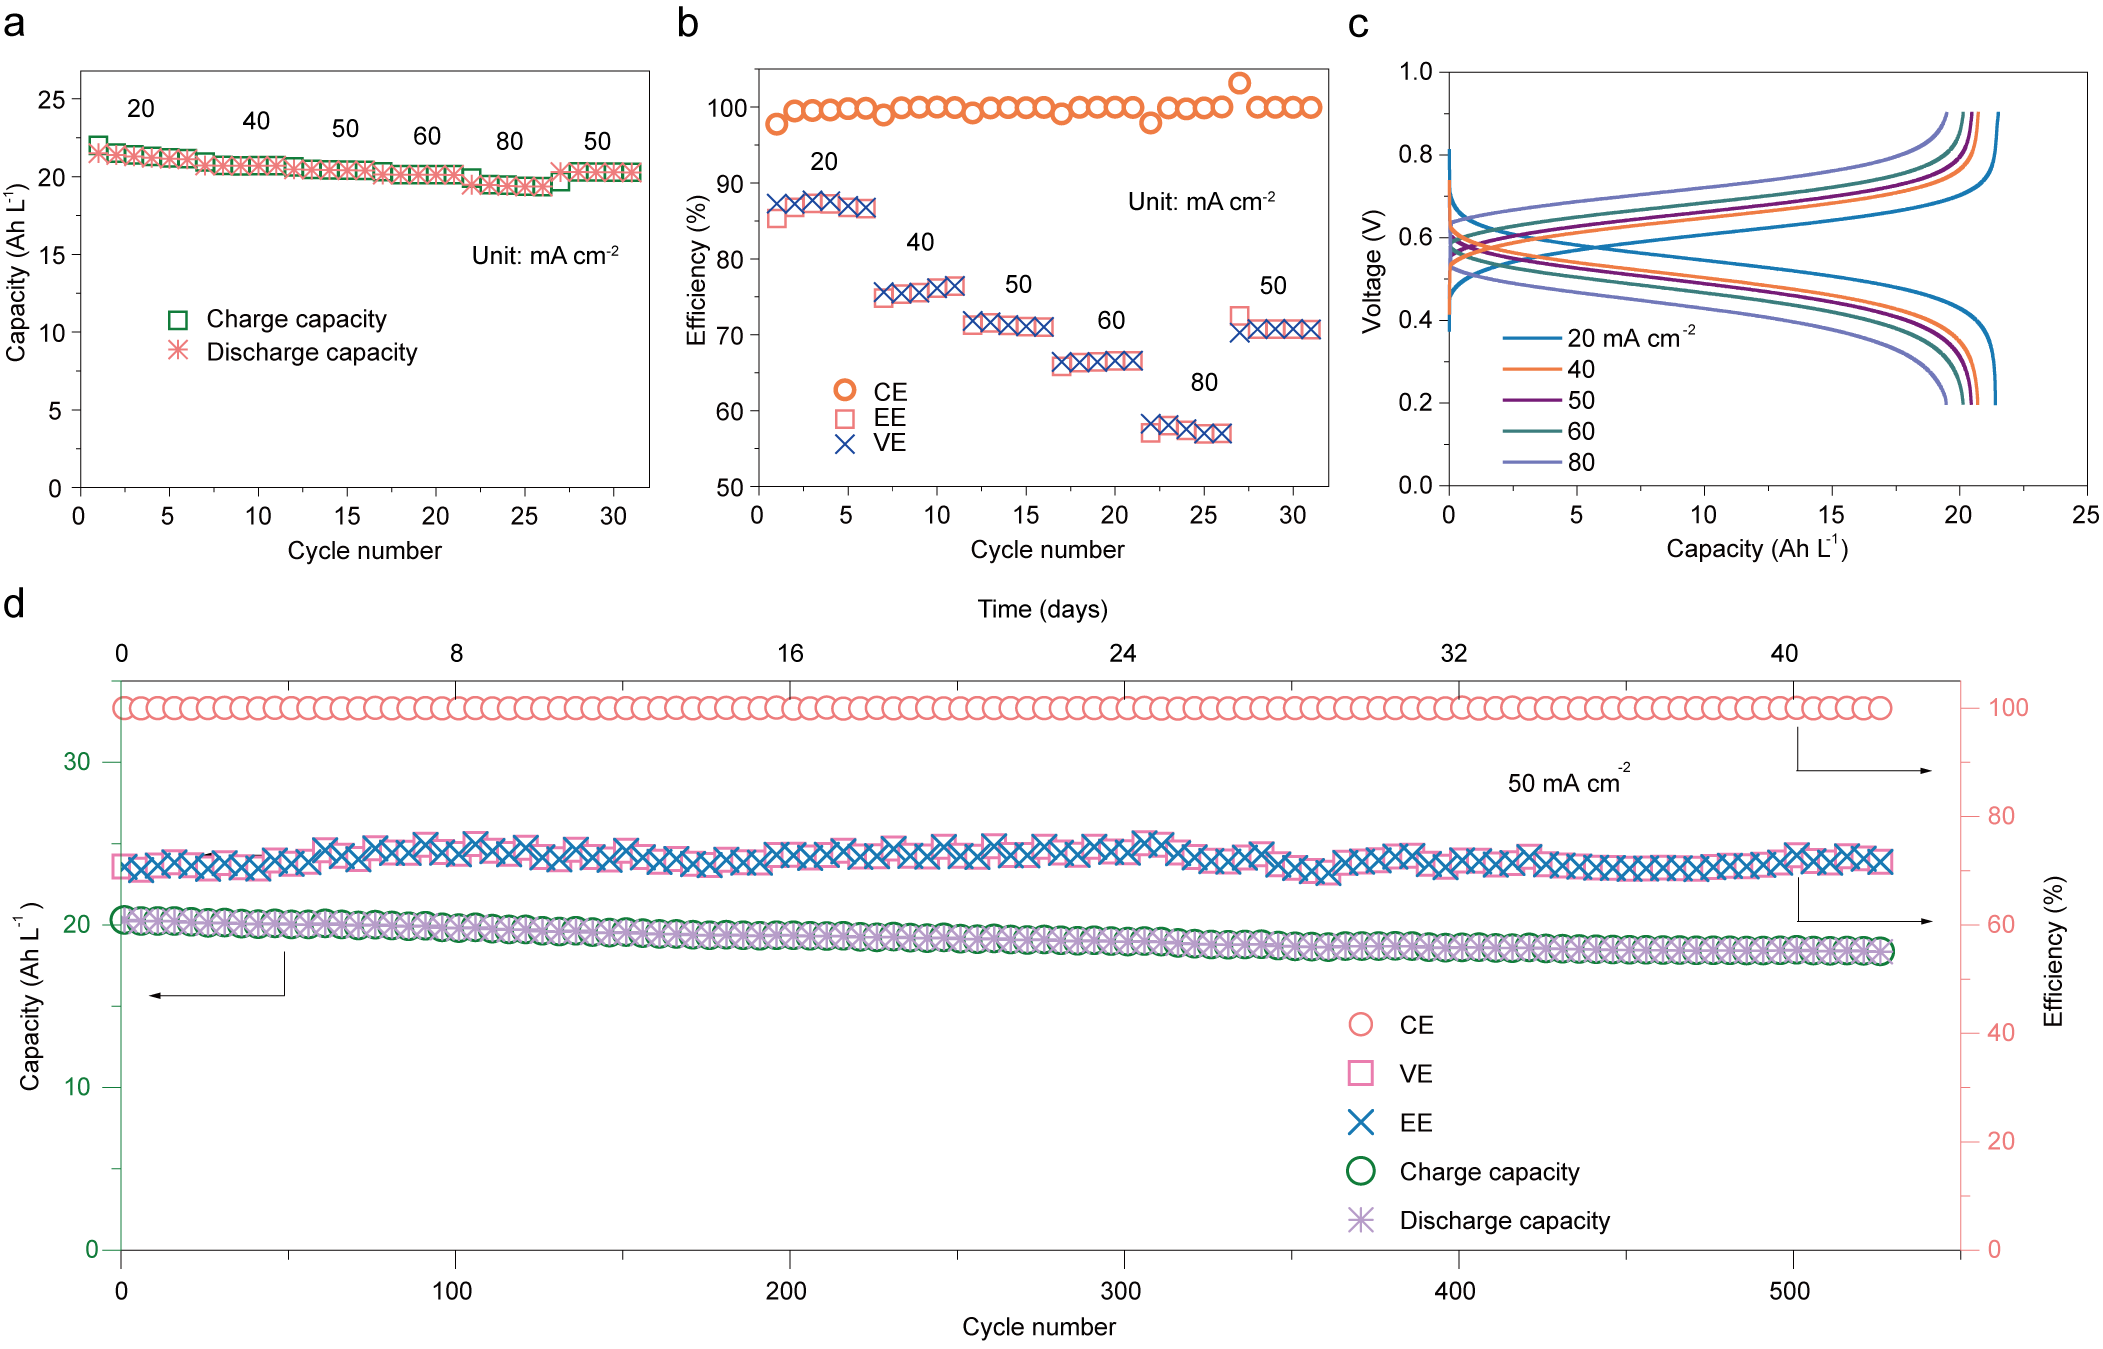


**Supplementary Figure 50**. Discharge capacity, charge capacity, CEs, VEs and EEs at different current densities.


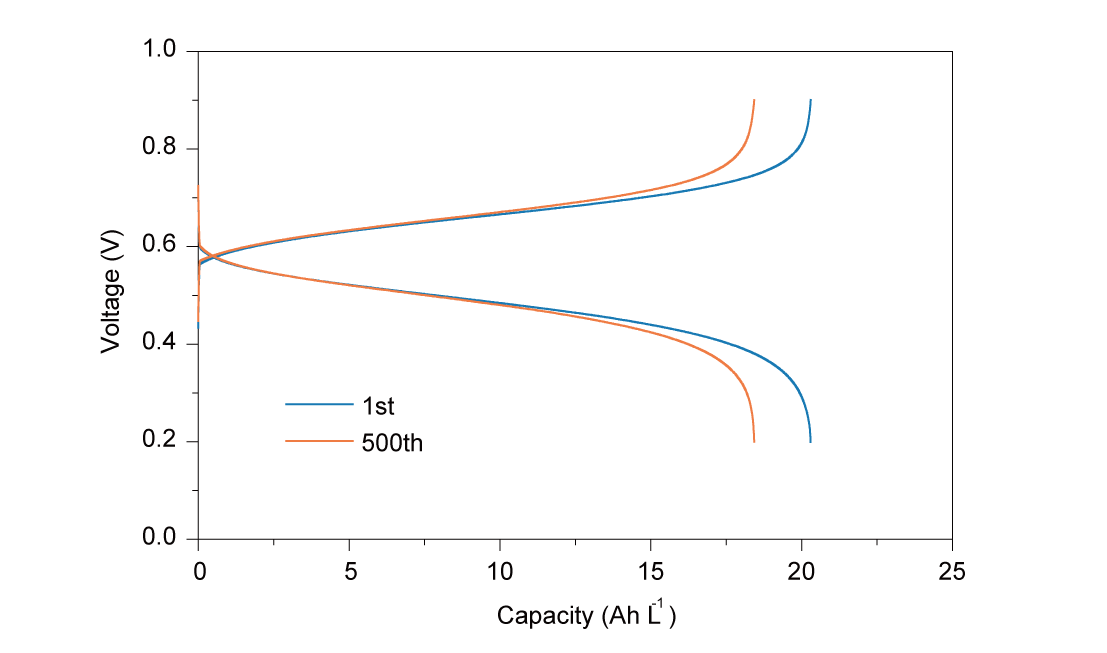


**Supplementary Figure 51**. Representative charge and discharge profiles of 1st and 500th cycles (1.0 M C2ViIm anolyte and 1.0 M BTMAP-Fc catholyte).


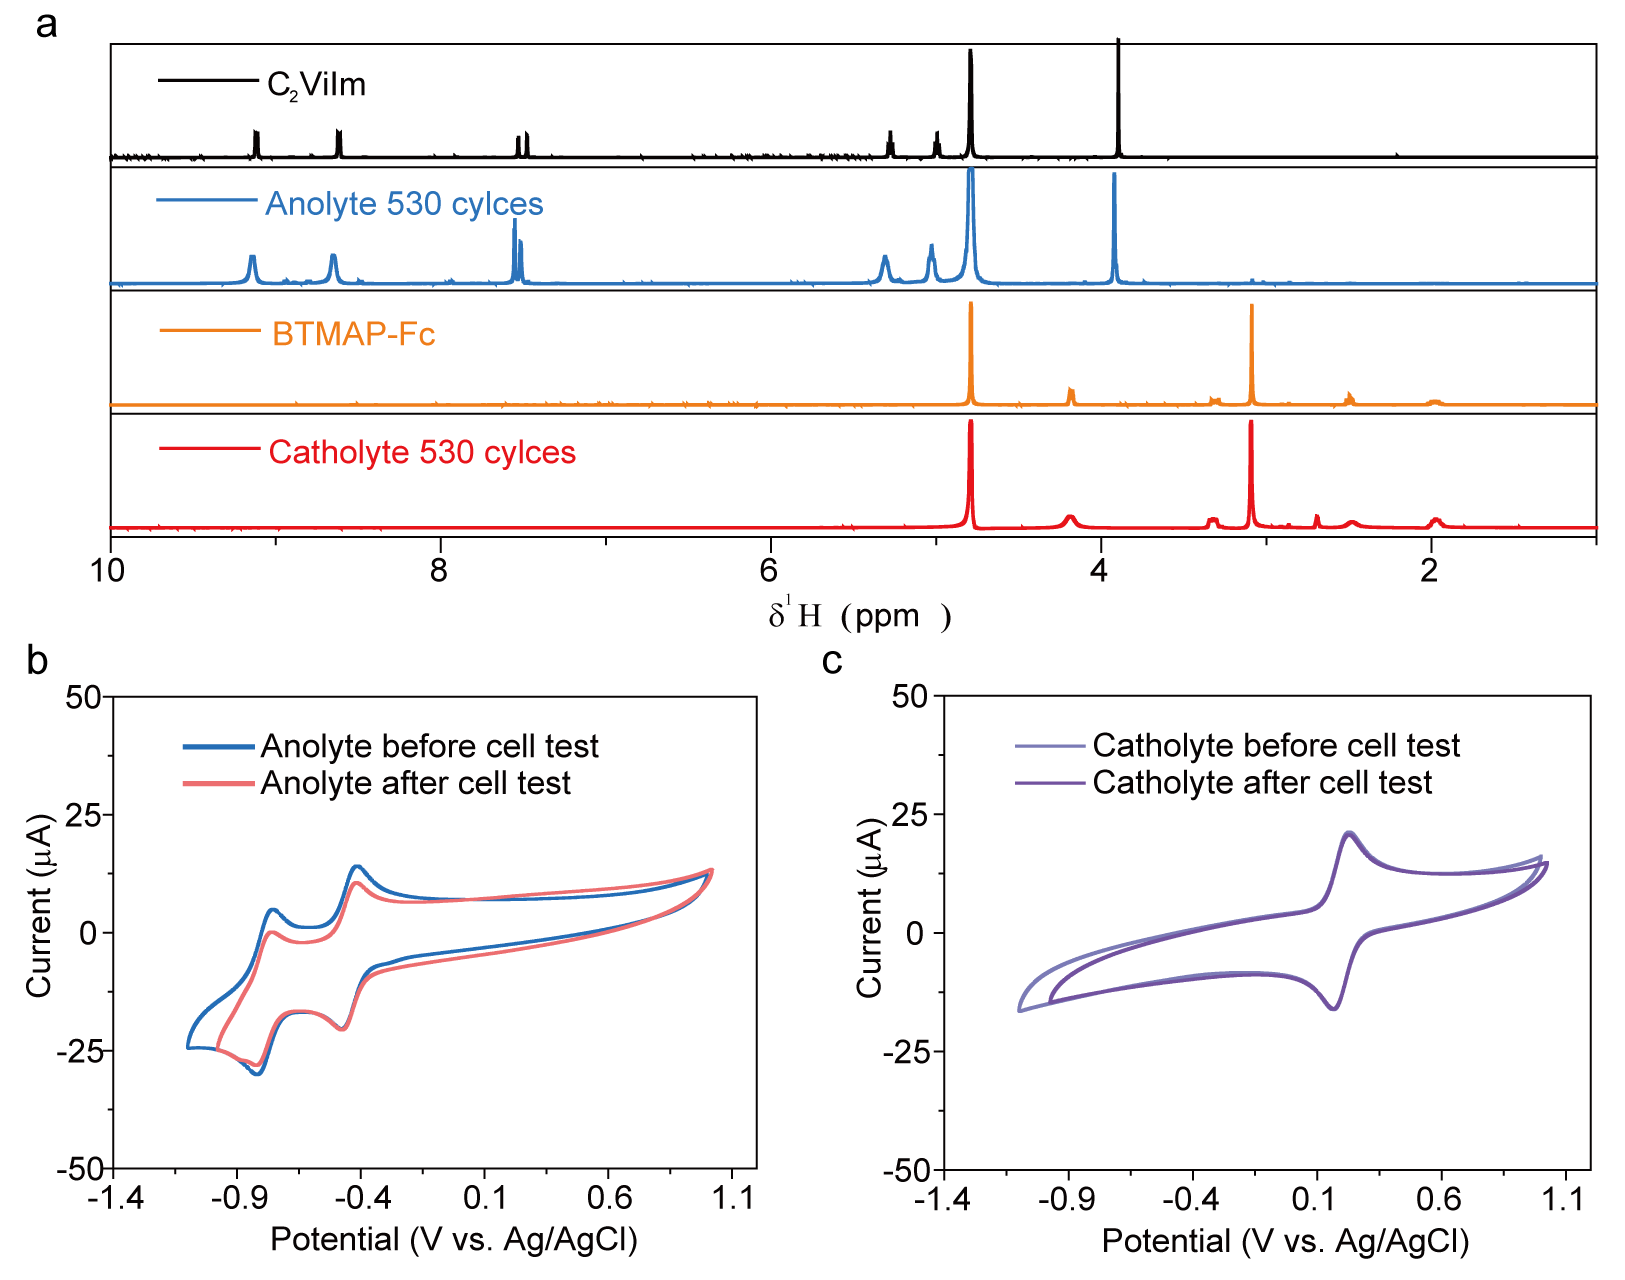


**Supplementary Figure 52**. Characterization of electrolytes for 1.0 M BTMAP-Fc/C2ViIm AORFB after cycling. (a) 1H NMR spectra comparison for BTMAP-Fc, C2ViIm, the catholyte and the anolyte after 530 cycles. Cyclic voltammograms of the anolyte (b) and the catholyte (c) before and after 530 cycles. The cell structure was 8 ml of a 1.0 M C2ViIm anolyte and 12 ml of a 1.0 M BTMAP-Fc catholyte (supporting electrolyte, 0.5 M NaCl).

**References**

1 Song, G., Wang, X., Li, Y. & Li, X. Iridium Abnormal N-Heterocyclic Carbene Hydrides via Highly Selective C−H Activation. *Organometallics* **27**, 1187-1192 (2008).

2 Chen, Q. *et al.* Designer Ferrocene Catholyte for Aqueous Organic Flow Batteries. *Chemsuschem* **14**, 1295-1301 (2021).

3 Beh, E. S. *et al.* A Neutral pH Aqueous Organic–Organometallic Redox Flow Battery with Extremely High Capacity Retention. *Acs Energy Lett* **2**, 639-644 (2017).

4 M. J. Frisch, G. W. T., H. B. Schlegel, G. E. Scuseria,  *et al.* Gaussian 09, Revision D.01. (Gaussian 2013).

5 Marenich, A. V., Cramer, C. J. & Truhlar, D. G. Universal solvation model based on solute electron density and on a continuum model of the solvent defined by the bulk dielectric constant and atomic surface tensions. *J Phys Chem B* **113**, 6378-6396 (2009).

6 Florian Weigenda, R. A. Balanced basis sets of split valence, triple zeta valence and quadruple zeta valence quality for H to Rn: Design and assessment of accuracy. *Phys Chem Chem Phys* **7**, 3297-3305 (2005).

7 Fukui, K. The path of chemical reactions - the IRC approach. *Accounts Chem Res* **14**, 363-368 (2002).

8 D. A. McQuarrie, J. S. Physical Chemistry: A Molecular Approach, University Science Books. (1997).

9 Lu, T. & Chen, Q. Shermo: A general code for calculating molecular thermochemistry properties. *Computational and Theoretical Chemistry* **1200** (2021).

10 Wang, M. *et al.* Molecular Geometries and Vibrational Contributions to Reaction Thermochemistry Are Surprisingly Insensitive to the Choice of Basis Sets. *J Chem Theory Comput* **19**, 5036-5046 (2023).

11 Zhao, Y. & Truhlar, D. G. The M06 suite of density functionals for main group thermochemistry, thermochemical kinetics, noncovalent interactions, excited states, and transition elements: two new functionals and systematic testing of four M06-class functionals and 12 other functionals. *Theoretical Chemistry Accounts* **120**, 215-241 (2007).

12 Weigend, F., Häser, M., Patzelt, H. & Ahlrichs, R. RI-MP2: optimized auxiliary basis sets and demonstration of efficiency. *Chemical Physics Letters* **294**, 143-152 (1998).

13 de Andrade, K. N., Peixoto, B. P., Carneiro, J. W. M. & Fiorot, R. G. Exploring borderline S(N)1-S(N)2 mechanisms: the role of explicit solvation protocols in the DFT investigation of isopropyl chloride. *Rsc Adv* **14**, 4692-4701 (2024).

14 Grimme, S., Antony, J., Ehrlich, S. & Krieg, H. A consistent and accurate ab initio parametrization of density functional dispersion correction (DFT-D) for the 94 elements H-Pu. *J Chem Phys* **132**, 154104 (2010).

15 Monkowius, U., Nogai, S. & Schmidbaur, H. A Conformational Analysis of the Spirocyclic Quaternary Ammonium Cation [(CH2)4N(CH2)4]+ in its Bromide and Picrate Salts. *Zeitschrift für Naturforschung B* **59**, 259-263 (2004).

16 Ishigaki, Y., Shimajiri, T., Takeda, T., Katoono, R. & Suzuki, T. Longest C–C Single Bond among Neutral Hydrocarbons with a Bond Length beyond 1.8 Å. *Chem-Us* **4**, 795-806 (2018).

17 Jin, S. *et al.* Near Neutral pH Redox Flow Battery with Low Permeability and Long‐Lifetime Phosphonated Viologen Active Species. *Advanced Energy Materials* **10**, 202000100 (2020).

18 Johnson, E. R. *et al.* Revealing Noncovalent Interactions. *J Am Chem Soc* **132**, 6498-6506 (2010).

19 Xiang, Z. *et al.* Manipulating Aggregate Electrochemistry for High‐Performance Organic Redox Flow Batteries. *Angewandte Chemie International Edition* **64** (2024).
